# Supplementary material for: Construction of High Density Sweet Cherry (Prunus avium L.) Linkage Maps Using Microsatellite Markers and SNPs Detected by Genotyping-by-Sequencing (GBS)
Source: PLoS One. 2015 May 26;10(5):e0127750. doi: 10.1371/journal.pone.0127750 (PMC4444190; doi:10.1371/journal.pone.0127750)
Supplement: S3 Table — (XLSX) [file pone.0127750.s005.xlsx]

## Sheet: Hoja1
S3 Table. Number and segregation type of informative SNPs in Ra x Ri progeny by scaffold.
Scaffold	<lmxll>	<nnxnp>	<hkxhk>	Total
1	417	395	897	1709
2	281	186	635	1102
3	236	199	456	891
4	184	350	537	1071
5	196	137	424	757
6	272	284	617	1173
7	158	190	525	873
8	206	139	555	900
Total	1950	1880	4646	8476
Ra – ‘Rainier’; Ri – ‘Rivedel’; lmxll – SNPs segregating only in ‘Rainier’; nnxnp – SNPs segregating only in ‘Rivedel’; hkxhk – SNPs segregating in both parents.
