# Supplementary material for: Construction of High Density Sweet Cherry (Prunus avium L.) Linkage Maps Using Microsatellite Markers and SNPs Detected by Genotyping-by-Sequencing (GBS)
Source: PLoS One. 2015 May 26;10(5):e0127750. doi: 10.1371/journal.pone.0127750 (PMC4444190; doi:10.1371/journal.pone.0127750)
Supplement: S4 Table — (XLSX) [file pone.0127750.s006.xlsx]

## Sheet: Hoja1
	S4 Table. Distribution of SNPs in genic (exonic, intronic and UTR) and intergenic regions. Peach v1.0 (Verde et al., 2013) was used as reference.
	Scaffold	Exonic (%)	Intronic (%)	UTR (%)	Genic regiona (%)	Intergenic region (%)
	1	50.9	15.6	2.6	69.1	30.9
	2	47.2	12.1	0.6	59.9	40.1
	3	51.1	14.5	1.3	66.9	33.1
	4	45.8	15.1	0.7	61.6	38.4
	5	57.9	16.3	1.8	76	24
	6	46.9	15.5	2.5	64.9	35.1
	7	51.5	12.2	1.4	65.1	34.9
	8	47.4	13.4	1.3	62.1	37.9
	Average	49.8	14.3	1.5	65.6	34.4
	References
	Verde I, Abbott AG, Scalabrin S, Jung S, Shu S, Marroni F, et al. Nature Genetics 2013; 45(5): 487:496.
