# Supplementary material for: Construction of High Density Sweet Cherry (Prunus avium L.) Linkage Maps Using Microsatellite Markers and SNPs Detected by Genotyping-by-Sequencing (GBS)
Source: PLoS One. 2015 May 26;10(5):e0127750. doi: 10.1371/journal.pone.0127750 (PMC4444190; doi:10.1371/journal.pone.0127750)
Supplement: S5 Table — (XLSX) [file pone.0127750.s007.xlsx]

## Sheet: Hoja1
S5 Table. Microsatellite markers used for mapping.
Marker	LG	Segregation
CPPCT-029	1	<abxcd>
PMS-67	1	<abxcd>
EMPA-016	1	<efxeg>
UDAp-414	1	<efxeg>
UDAp-415	1	<efxeg>
EMPA-005	1	<efxeg>
UCD-CH11	2	<efxeg>
UCD-CH21	2	<efxeg>
UCD-CH12	2	<efxeg>
EMPA-013	2	<efxeg>
UDP98-410	2	<efxeg>
PceGA-34	2	<efxeg>
PMS-30	3	<efxeg>
UDP97-403	3	<efxeg>
BPPCT-007	3	<hkxhk>
pchcms5	3	<hkxhk>
UDAp-416	4	<hkxhk>
BPPCT-026	5	<hkxhk>
BPPCT-038	5	<hkxhk>
BPPCT-037	5	<hkxhk>
EMPaS-14	5	<hkxhk>
EPPCU-9168	5	<lmxll>
CPSCT-002	6	<lmxll>
EMPaS-01	6	<lmxll>
EPPCU-3090	6	<lmxll>
EMPA-004	6	<lmxll>
UDP98-021	6	<lmxll>
MA020	7	<lmxll>
PMS-2	7	<lmxll>
CPPCT-033	7	<lmxll>
AMPA-107	7	<lmxll>
EPDCU-3392	7	<lmxll>
UCD-CH14	7	<lmxll>
EMPA-018	8	<abxcd>
