# Supplementary material for: Construction of High Density Sweet Cherry (Prunus avium L.) Linkage Maps Using Microsatellite Markers and SNPs Detected by Genotyping-by-Sequencing (GBS)
Source: PLoS One. 2015 May 26;10(5):e0127750. doi: 10.1371/journal.pone.0127750 (PMC4444190; doi:10.1371/journal.pone.0127750)
Supplement: S7 Table — (XLSX) [file pone.0127750.s009.xlsx]

## Sheet: Rainier
S7 Table. Markers mapped in 'Rainier', 'Rivedel' and consensus maps, including the linkage group and map position to which they were located.
LG	Marker	Position (cM)	Segregation	Phase	ll	lm	--	X2	Df	Signif.
RaLG1	s1_493072	0	<lmxll>	{0-}	81	76	9	0.16	1	-
RaLG1	s1_512037	0.048	<lmxll>	{1-}	84	81	1	0.05	1	-
RaLG1	s1_376328	0.68	<lmxll>	{1-}	83	83	0	0	1	-
RaLG1	s1_336438	0.68	<lmxll>	{0-}	83	83	0	0	1	-
RaLG1	s1_336583	0.69	<lmxll>	{0-}	83	80	3	0.06	1	-
RaLG1	s1_640847	3.138	<lmxll>	{1-}	83	80	3	0.06	1	-
RaLG1	s1_590653	3.142	<lmxll>	{0-}	83	83	0	0	1	-
RaLG1	s1_690093	3.142	<lmxll>	{1-}	83	83	0	0	1	-
RaLG1	UDAp-415	14.454	<lmxll>	{1-}	40	42	84	0.05	1	-
RaLG1	s1_5832765	15.974	<lmxll>	{0-}	93	72	1	2.67	1	-
RaLG1	s1_6885090	18.433	<lmxll>	{0-}	92	72	2	2.44	1	-
RaLG1	s1_6276615	18.597	<lmxll>	{0-}	92	74	0	1.95	1	-
RaLG1	s1_6502979	18.599	<lmxll>	{0-}	92	72	2	2.44	1	-
RaLG1	s1_6276714	18.688	<lmxll>	{0-}	91	70	5	2.74	1	*
RaLG1	s1_7819607	23.148	<lmxll>	{0-}	94	71	1	3.21	1	*
RaLG1	s1_7991355	23.4	<lmxll>	{0-}	94	72	0	2.92	1	*
RaLG1	s1_7965732	24.017	<lmxll>	{0-}	95	71	0	3.47	1	*
RaLG1	s1_9196124	32.714	<lmxll>	{1-}	73	93	0	2.41	1	-
RaLG1	s1_10119677	34.989	<lmxll>	{0-}	94	72	0	2.92	1	*
RaLG1	s1_10188365	35.201	<lmxll>	{1-}	71	93	2	2.95	1	*
RaLG1	s1_10188429	35.29	<lmxll>	{1-}	71	90	5	2.24	1	-
RaLG1	s1_10201987	35.309	<lmxll>	{1-}	71	95	0	3.47	1	*
RaLG1	s1_10162342	35.415	<lmxll>	{0-}	95	70	1	3.79	1	*
RaLG1	EMPA-005	40.067	<lmxll>	{1-}	71	95	0	3.47	1	*
RaLG1	s1_10846678	43.888	<lmxll>	{1-}	73	92	1	2.19	1	-
RaLG1	s1_11215791	46.197	<lmxll>	{1-}	73	89	4	1.58	1	-
RaLG1	s1_13493935	54.794	<lmxll>	{1-}	78	85	3	0.3	1	-
RaLG1	s1_13493994	54.804	<lmxll>	{1-}	78	86	2	0.39	1	-
RaLG1	s1_13363295	54.827	<lmxll>	{0-}	88	78	0	0.6	1	-
RaLG1	s1_13495868	54.827	<lmxll>	{1-}	78	88	0	0.6	1	-
RaLG1	s1_13495951	55.001	<lmxll>	{1-}	78	84	4	0.22	1	-
RaLG1	s1_12281523	55.545	<lmxll>	{1-}	76	90	0	1.18	1	-
RaLG1	s1_12254982	55.545	<lmxll>	{0-}	90	76	0	1.18	1	-
RaLG1	s1_11908684	55.706	<lmxll>	{1-}	76	88	2	0.88	1	-
RaLG1	s1_21700484	59.299	<lmxll>	{1-}	79	87	0	0.39	1	-
RaLG1	s1_22478761	59.934	<lmxll>	{0-}	86	79	1	0.3	1	-
RaLG1	s1_22453876	59.964	<lmxll>	{0-}	86	77	3	0.5	1	-
RaLG1	s1_28834950	80.692	<lmxll>	{0-}	91	68	7	3.33	1	*
RaLG1	s1_28785064	80.81	<lmxll>	{0-}	90	69	7	2.77	1	*
RaLG1	s1_28938918	80.844	<lmxll>	{0-}	85	65	16	2.67	1	-
RaLG1	s1_28448436	80.887	<lmxll>	{0-}	91	69	6	3.02	1	*
RaLG1	s1_28257606	81.009	<lmxll>	{0-}	91	74	1	1.75	1	-
RaLG1	s1_28272286	81.083	<lmxll>	{0-}	91	73	2	1.98	1	-
RaLG1	EMPA-016	84.101	<lmxll>	{0-}	48	40	78	0.73	1	-
RaLG1	s1_31012393	84.59	<lmxll>	{0-}	91	75	0	1.54	1	-
RaLG1	UDAp-414	85.098	<lmxll>	{1-}	43	50	73	0.53	1	-
RaLG1	PMS-67	90.939	<lmxll>	{0-}	91	75	0	1.54	1	-
RaLG1	s1_34199333	95.15	<lmxll>	{0-}	89	71	6	2.02	1	-
RaLG1	s1_33907538	95.265	<lmxll>	{0-}	89	76	1	1.02	1	-
RaLG1	s1_33895319	95.824	<lmxll>	{0-}	88	76	2	0.88	1	-
RaLG1	s1_33713372	95.924	<lmxll>	{0-}	88	78	0	0.6	1	-
RaLG1	s1_34740111	98.964	<lmxll>	{0-}	85	80	1	0.15	1	-
RaLG1	s1_34689215	98.964	<lmxll>	{0-}	84	81	1	0.05	1	-
RaLG1	s1_34740216	98.971	<lmxll>	{0-}	85	81	0	0.1	1	-
RaLG1	s1_34806902	99.244	<lmxll>	{0-}	85	79	2	0.22	1	-
RaLG1	s1_34936933	99.578	<lmxll>	{0-}	84	82	0	0.02	1	-
RaLG1	s1_35259318	101.864	<lmxll>	{0-}	86	78	2	0.39	1	-
RaLG1	s1_35282364	101.94	<lmxll>	{0-}	86	78	2	0.39	1	-
RaLG1	s1_35501976	103.783	<lmxll>	{0-}	87	79	0	0.39	1	-
RaLG1	s1_35520953	104.402	<lmxll>	{0-}	86	75	5	0.75	1	-
RaLG1	s1_35536636	104.41	<lmxll>	{0-}	86	80	0	0.22	1	-
RaLG1	s1_36570421	106.259	<lmxll>	{0-}	83	80	3	0.06	1	-
RaLG1	s1_36173160	106.286	<lmxll>	{0-}	83	80	3	0.06	1	-
RaLG1	s1_36092275	106.314	<lmxll>	{0-}	83	83	0	0	1	-
RaLG1	s1_35966775	106.315	<lmxll>	{0-}	83	81	2	0.02	1	-
RaLG1	s1_36775145	106.338	<lmxll>	{0-}	83	82	1	0.01	1	-
RaLG1	s1_36598428	106.341	<lmxll>	{0-}	83	81	2	0.02	1	-
RaLG1	s1_36572605	106.367	<lmxll>	{0-}	82	77	7	0.16	1	-
RaLG1	s1_36600924	106.518	<lmxll>	{0-}	83	80	3	0.06	1	-
RaLG1	s1_36974244	109.961	<lmxll>	{0-}	83	83	0	0	1	-
RaLG1	s1_37035243	111.208	<lmxll>	{0-}	85	81	0	0.1	1	-
RaLG1	s1_37100371	111.239	<lmxll>	{0-}	85	78	3	0.3	1	-
RaLG1	s1_37100959	111.455	<lmxll>	{0-}	85	75	6	0.62	1	-
RaLG1	s1_37425351	114.286	<lmxll>	{0-}	84	81	1	0.05	1	-
RaLG1	s1_38238968	118.82	<lmxll>	{0-}	85	81	0	0.1	1	-
RaLG1	s1_38148601	119.214	<lmxll>	{0-}	85	75	6	0.62	1	-
RaLG1	s1_38238599	119.457	<lmxll>	{0-}	86	76	4	0.62	1	-
RaLG1	s1_39063825	120.699	<lmxll>	{0-}	88	78	0	0.6	1	-
RaLG1	s1_40623243	125.107	<lmxll>	{0-}	91	74	1	1.75	1	-
RaLG1	s1_40714828	126.446	<lmxll>	{0-}	89	77	0	0.87	1	-
RaLG1	s1_44124719	134.034	<lmxll>	{0-}	87	79	0	0.39	1	-
RaLG1	s1_42980659	136.961	<lmxll>	{0-}	82	73	11	0.52	1	-
RaLG1	s1_43149931	137.695	<lmxll>	{1-}	83	75	8	0.41	1	-
RaLG1	s1_42975295	138.119	<lmxll>	{0-}	81	78	7	0.06	1	-
RaLG1	s1_42397607	138.13	<lmxll>	{1-}	82	80	4	0.02	1	-
RaLG1	s1_42186718	138.13	<lmxll>	{1-}	82	83	1	0.01	1	-
RaLG1	s1_43475799	138.514	<lmxll>	{1-}	84	81	1	0.05	1	-
RaLG1	s1_43102782	138.523	<lmxll>	{1-}	84	80	2	0.1	1	-
RaLG1	s1_43114928	138.532	<lmxll>	{1-}	84	79	3	0.15	1	-
RaLG1	s1_43084529	138.537	<lmxll>	{1-}	84	79	3	0.15	1	-
RaLG1	s1_43150715	138.542	<lmxll>	{1-}	84	81	1	0.05	1	-
RaLG1	s1_43102725	138.546	<lmxll>	{1-}	83	80	3	0.06	1	-
RaLG1	s1_43062476	138.549	<lmxll>	{0-}	82	84	0	0.02	1	-
RaLG1	s1_43701037	138.549	<lmxll>	{1-}	84	82	0	0.02	1	-
RaLG1	s1_43475775	138.556	<lmxll>	{0-}	82	83	1	0.01	1	-
RaLG1	s1_43221581	138.564	<lmxll>	{1-}	83	81	2	0.02	1	-
RaLG1	s1_43084621	138.565	<lmxll>	{1-}	84	80	2	0.1	1	-
RaLG1	s1_43139665	138.681	<lmxll>	{1-}	83	81	2	0.02	1	-
RaLG1	s1_42924871	139.071	<lmxll>	{1-}	83	82	1	0.01	1	-
RaLG1	s4_3011114	139.075	<lmxll>	{1-}	83	83	0	0	1	-
RaLG1	s1_43016879	139.085	<lmxll>	{0-}	83	82	1	0.01	1	-
RaLG1	s1_42801165	139.096	<lmxll>	{1-}	83	81	2	0.02	1	-
RaLG1	s1_42186915	139.515	<lmxll>	{1-}	82	84	0	0.02	1	-
RaLG1	s1_42153859	139.555	<lmxll>	{1-}	81	79	6	0.02	1	-
RaLG2	s2_9861152	0	<lmxll>	{1-}	76	88	2	0.88	1	-
RaLG2	s2_10258716	0.03	<lmxll>	{1-}	76	89	1	1.02	1	-
RaLG2	s2_10147949	0.069	<lmxll>	{0-}	90	76	0	1.18	1	-
RaLG2	s2_9691706	0.431	<lmxll>	{1-}	76	85	5	0.5	1	-
RaLG2	s2_705961	6.086	<lmxll>	{1-}	70	94	2	3.51	1	*
RaLG2	s2_706131	6.141	<lmxll>	{1-}	70	96	0	4.07	1	**
RaLG2	s2_705067	6.793	<lmxll>	{1-}	70	90	6	2.5	1	-
RaLG2	s2_4912153	12.583	<lmxll>	{1-}	75	86	5	0.75	1	-
RaLG2	s2_3851317	12.698	<lmxll>	{0-}	91	74	1	1.75	1	-
RaLG2	s2_3867998	12.841	<lmxll>	{0-}	91	75	0	1.54	1	-
RaLG2	s2_3987595	13.537	<lmxll>	{1-}	76	85	5	0.5	1	-
RaLG2	s2_6071765	16.553	<lmxll>	{1-}	79	85	2	0.22	1	-
RaLG2	s2_11564418	19.041	<lmxll>	{1-}	78	85	3	0.3	1	-
RaLG2	s2_12752388	19.235	<lmxll>	{1-}	63	86	17	3.55	1	*
RaLG2	s2_11354990	19.662	<lmxll>	{1-}	78	86	2	0.39	1	-
RaLG2	s2_12809720	20.099	<lmxll>	{1-}	77	83	6	0.22	1	-
RaLG2	s2_12441799	20.287	<lmxll>	{1-}	77	89	0	0.87	1	-
RaLG2	s2_12447854	20.899	<lmxll>	{1-}	76	89	1	1.02	1	-
RaLG2	s2_13414676	20.92	<lmxll>	{1-}	76	90	0	1.18	1	-
RaLG2	s2_13416116	21.741	<lmxll>	{1-}	75	89	2	1.2	1	-
RaLG2	s2_17172344	31.03	<lmxll>	{1-}	71	90	5	2.24	1	-
RaLG2	s2_16900286	31.04	<lmxll>	{1-}	70	92	4	2.99	1	*
RaLG2	s2_16755779	31.103	<lmxll>	{1-}	71	94	1	3.21	1	*
RaLG2	s2_17136218	31.109	<lmxll>	{1-}	71	93	2	2.95	1	*
RaLG2	s2_17105740	31.124	<lmxll>	{1-}	71	95	0	3.47	1	*
RaLG2	s2_16700339	31.197	<lmxll>	{1-}	71	92	3	2.71	1	-
RaLG2	s2_17122248	31.4	<lmxll>	{1-}	70	80	16	0.67	1	-
RaLG2	s2_16175781	31.826	<lmxll>	{1-}	72	92	2	2.44	1	-
RaLG2	s2_15691757	31.833	<lmxll>	{1-}	72	94	0	2.92	1	*
RaLG2	s2_15693693	32.129	<lmxll>	{1-}	71	95	0	3.47	1	*
RaLG2	s2_15640184	32.277	<lmxll>	{1-}	72	93	1	2.67	1	-
RaLG2	s2_15691801	32.369	<lmxll>	{1-}	72	94	0	2.92	1	*
RaLG2	s2_15356547	32.587	<lmxll>	{1-}	74	90	2	1.56	1	-
RaLG2	s2_15089812	32.717	<lmxll>	{1-}	74	91	1	1.75	1	-
RaLG2	s2_14256335	32.738	<lmxll>	{1-}	75	91	0	1.54	1	-
RaLG2	s2_14471925	33.093	<lmxll>	{1-}	73	93	0	2.41	1	-
RaLG2	s2_19869360	40.845	<lmxll>	{1-}	65	93	8	4.96	1	**
RaLG2	s2_19791688	41.754	<lmxll>	{1-}	63	99	4	8	1	**
RaLG2	s2_20222586	45.189	<lmxll>	{1-}	62	96	8	7.32	1	**
RaLG2	s2_20413771	46.529	<lmxll>	{1-}	61	101	4	9.88	1	**
RaLG2	s2_20417101	47.245	<lmxll>	{1-}	62	104	0	10.63	1	**
RaLG2	s2_20320291	48.717	<lmxll>	{1-}	64	100	2	7.9	1	**
RaLG2	s2_21629421	51.231	<lmxll>	{1-}	65	92	9	4.64	1	**
RaLG2	UCD-CH11	52.61	<lmxll>	{0-}	99	67	0	6.17	1	**
RaLG2	s2_21695836	52.61	<lmxll>	{1-}	67	99	0	6.17	1	**
RaLG2	s2_21662414	52.864	<lmxll>	{1-}	67	92	7	3.93	1	**
RaLG2	s2_22033331	53.871	<lmxll>	{0-}	99	67	0	6.17	1	**
RaLG2	s2_22784889	59.432	<lmxll>	{1-}	66	94	6	4.9	1	**
RaLG2	s2_23334906	59.745	<lmxll>	{0-}	99	66	1	6.6	1	**
RaLG2	UCD-CH12	59.888	<lmxll>	{1-}	67	99	0	6.17	1	**
RaLG2	s2_23272082	59.888	<lmxll>	{0-}	99	67	0	6.17	1	**
RaLG2	s2_23677811	61.07	<lmxll>	{0-}	97	69	0	4.72	1	**
RaLG2	s2_24576208	63.49	<lmxll>	{1-}	71	95	0	3.47	1	*
RaLG2	s2_24987649	65.38	<lmxll>	{1-}	70	96	0	4.07	1	**
RaLG2	s2_25523698	65.98	<lmxll>	{1-}	71	90	5	2.24	1	-
RaLG2	s2_25371101	65.984	<lmxll>	{0-}	95	70	1	3.79	1	*
RaLG2	s2_25244162	65.997	<lmxll>	{1-}	71	95	0	3.47	1	*
RaLG2	PceGA-34	66.355	<lmxll>	{1-}	72	94	0	2.92	1	*
RaLG2	UDP98-410	66.355	<lmxll>	{0-}	94	72	0	2.92	1	*
RaLG2	s2_25553931	66.934	<lmxll>	{1-}	73	93	0	2.41	1	-
RaLG2	s2_25623458	67.448	<lmxll>	{1-}	73	87	6	1.23	1	-
RaLG2	s2_25780503	67.646	<lmxll>	{1-}	74	87	5	1.05	1	-
RaLG2	s2_26020798	68.376	<lmxll>	{1-}	73	83	10	0.64	1	-
RaLG2	s2_26293818	68.721	<lmxll>	{1-}	75	91	0	1.54	1	-
RaLG2	s2_26572434	68.753	<lmxll>	{1-}	75	83	8	0.41	1	-
RaLG2	s2_26288441	68.861	<lmxll>	{1-}	75	85	6	0.62	1	-
RaLG3	s3_673070	0	<lmxll>	{0-}	77	82	7	0.16	1	-
RaLG3	s3_208499	0.032	<lmxll>	{0-}	79	83	4	0.1	1	-
RaLG3	s3_357550	0.069	<lmxll>	{0-}	79	87	0	0.39	1	-
RaLG3	s3_96273	0.086	<lmxll>	{0-}	79	86	1	0.3	1	-
RaLG3	s3_832042	0.587	<lmxll>	{0-}	81	85	0	0.1	1	-
RaLG3	s3_1262637	0.589	<lmxll>	{0-}	81	82	3	0.01	1	-
RaLG3	s3_1934809	0.857	<lmxll>	{0-}	79	76	11	0.06	1	-
RaLG3	s3_1721292	0.893	<lmxll>	{0-}	80	81	5	0.01	1	-
RaLG3	s3_853519	0.895	<lmxll>	{0-}	80	82	4	0.02	1	-
RaLG3	s3_1517551	0.921	<lmxll>	{0-}	80	86	0	0.22	1	-
RaLG3	s3_1517441	0.929	<lmxll>	{0-}	80	83	3	0.06	1	-
RaLG3	s3_225999	1.3	<lmxll>	{0-}	79	83	4	0.1	1	-
RaLG3	s3_615587	1.311	<lmxll>	{0-}	79	86	1	0.3	1	-
RaLG3	s3_446641	1.318	<lmxll>	{0-}	79	82	5	0.06	1	-
RaLG3	s3_440979	1.333	<lmxll>	{0-}	79	82	5	0.06	1	-
RaLG3	s3_4475039	11.846	<lmxll>	{0-}	77	87	2	0.61	1	-
RaLG3	s3_2950758	12.242	<lmxll>	{0-}	78	83	5	0.16	1	-
RaLG3	s3_3374252	17.12	<lmxll>	{0-}	82	84	0	0.02	1	-
RaLG3	s3_4194966	20.193	<lmxll>	{0-}	81	76	9	0.16	1	-
RaLG3	s3_4170950	20.578	<lmxll>	{0-}	80	85	1	0.15	1	-
RaLG3	s3_3987687	20.656	<lmxll>	{0-}	79	75	12	0.1	1	-
RaLG3	s3_4988156	24.671	<lmxll>	{0-}	79	83	4	0.1	1	-
RaLG3	s3_9781229	32.064	<lmxll>	{1-}	85	76	5	0.5	1	-
RaLG3	s3_9783189	32.868	<lmxll>	{1-}	85	77	4	0.4	1	-
RaLG3	s3_13620577	33.152	<lmxll>	{0-}	81	77	8	0.1	1	-
RaLG3	s3_9826594	34.767	<lmxll>	{0-}	80	86	0	0.22	1	-
RaLG3	s3_10620285	36.044	<lmxll>	{1-}	88	78	0	0.6	1	-
RaLG3	s3_12383969	37.397	<lmxll>	{1-}	88	72	6	1.6	1	-
RaLG3	s3_12674159	39.207	<lmxll>	{0-}	79	86	1	0.3	1	-
RaLG3	s3_12712447	39.214	<lmxll>	{0-}	79	87	0	0.39	1	-
RaLG3	s3_13417026	44.96	<lmxll>	{0-}	80	83	3	0.06	1	-
RaLG3	s3_13779550	46.649	<lmxll>	{0-}	79	87	0	0.39	1	-
RaLG3	s3_14518185	51.53	<lmxll>	{0-}	81	79	6	0.02	1	-
RaLG3	s3_14372430	51.697	<lmxll>	{0-}	80	85	1	0.15	1	-
RaLG3	s3_15463298	53.505	<lmxll>	{1-}	84	79	3	0.15	1	-
RaLG3	s3_15497961	54.27	<lmxll>	{0-}	83	81	2	0.02	1	-
RaLG3	s3_15472030	55.181	<lmxll>	{1-}	84	79	3	0.15	1	-
RaLG3	s3_16098848	58.733	<lmxll>	{0-}	86	80	0	0.22	1	-
RaLG3	s3_17598484	61.547	<lmxll>	{1-}	83	76	7	0.31	1	-
RaLG3	s3_17388280	62.415	<lmxll>	{1-}	82	83	1	0.01	1	-
RaLG3	s3_17301940	62.46	<lmxll>	{1-}	82	83	1	0.01	1	-
RaLG3	s3_17367086	62.467	<lmxll>	{1-}	82	84	0	0.02	1	-
RaLG3	s3_17342357	62.473	<lmxll>	{1-}	82	82	2	0	1	-
RaLG3	s3_17034728	62.508	<lmxll>	{1-}	82	75	9	0.31	1	-
RaLG3	s3_17349238	62.611	<lmxll>	{1-}	80	74	12	0.23	1	-
RaLG3	s3_17891918	63.724	<lmxll>	{0-}	86	80	0	0.22	1	-
RaLG3	s3_17388199	64.391	<lmxll>	{1-}	81	80	5	0.01	1	-
RaLG3	s3_18278501	66.183	<lmxll>	{0-}	82	84	0	0.02	1	-
RaLG3	s3_18258127	66.846	<lmxll>	{0-}	80	81	5	0.01	1	-
RaLG3	s3_18628381	68.029	<lmxll>	{0-}	83	82	1	0.01	1	-
RaLG3	s3_18278453	68.956	<lmxll>	{0-}	85	78	3	0.3	1	-
RaLG3	s3_20248413	72.832	<lmxll>	{0-}	84	77	5	0.3	1	-
RaLG3	s3_20369092	73.567	<lmxll>	{0-}	86	80	0	0.22	1	-
RaLG3	s3_21354946	73.638	<lmxll>	{0-}	86	78	2	0.39	1	-
RaLG3	s3_20590416	73.675	<lmxll>	{0-}	86	76	4	0.62	1	-
RaLG4	s4_13751491	0	<lmxll>	{1-}	84	73	9	0.77	1	-
RaLG4	s4_13966821	4.182	<lmxll>	{1-}	82	84	0	0.02	1	-
RaLG4	s4_18129927	14.721	<lmxll>	{0-}	80	86	0	0.22	1	-
RaLG4	s4_23061047	22.832	<lmxll>	{1-}	89	72	5	1.8	1	-
RaLG4	s4_23042604	23.769	<lmxll>	{1-}	88	74	4	1.21	1	-
RaLG4	s4_22963499	23.896	<lmxll>	{1-}	88	77	1	0.73	1	-
RaLG4	s4_23042686	24.114	<lmxll>	{1-}	90	72	4	2	1	-
RaLG4	s4_23780118	24.115	<lmxll>	{1-}	90	72	4	2	1	-
RaLG4	s4_23042765	24.283	<lmxll>	{1-}	89	68	9	2.81	1	*
RaLG4	s4_27322722	25.536	<lmxll>	{0-}	79	84	3	0.15	1	-
RaLG4	s4_26671992	27.419	<lmxll>	{1-}	88	78	0	0.6	1	-
RaLG4	s8_13457699	28.612	<lmxll>	{0-}	78	87	1	0.49	1	-
RaLG4	s4_26292908	28.803	<lmxll>	{1-}	88	71	7	1.82	1	-
RaLG5	s5_2722408	0	<lmxll>	{0-}	79	83	4	0.1	1	-
RaLG5	s5_2760029	0.046	<lmxll>	{0-}	79	85	2	0.22	1	-
RaLG5	s5_1986033	0.419	<lmxll>	{0-}	79	86	1	0.3	1	-
RaLG5	s5_1797623	0.666	<lmxll>	{1-}	88	76	2	0.88	1	-
RaLG5	s4_2613920	0.704	<lmxll>	{1-}	88	78	0	0.6	1	-
RaLG5	s5_1121958	1.491	<lmxll>	{1-}	86	70	10	1.64	1	-
RaLG5	s5_674862	2.44	<lmxll>	{1-}	85	79	2	0.22	1	-
RaLG5	s5_389562	4.305	<lmxll>	{1-}	88	78	0	0.6	1	-
RaLG5	EPPCU-9168	4.929	<lmxll>	{1-}	89	77	0	0.87	1	-
RaLG5	s5_3232514	5.598	<lmxll>	{1-}	88	75	3	1.04	1	-
RaLG5	s5_3645100	6.18	<lmxll>	{1-}	87	79	0	0.39	1	-
RaLG5	s5_3658213	6.741	<lmxll>	{1-}	88	74	4	1.21	1	-
RaLG5	BPPCT-026	6.805	<lmxll>	{1-}	88	78	0	0.6	1	-
RaLG5	s5_4649816	7.434	<lmxll>	{0-}	79	87	0	0.39	1	-
RaLG5	s5_4962108	10.031	<lmxll>	{1-}	89	76	1	1.02	1	-
RaLG5	s5_5853190	12.507	<lmxll>	{1-}	89	77	0	0.87	1	-
RaLG5	s5_8793208	18.446	<lmxll>	{1-}	88	75	3	1.04	1	-
RaLG5	s5_8264772	19.799	<lmxll>	{1-}	88	72	6	1.6	1	-
RaLG5	s5_12111965	26.136	<lmxll>	{0-}	77	81	8	0.1	1	-
RaLG5	s5_12091154	26.761	<lmxll>	{0-}	76	86	4	0.62	1	-
RaLG5	s5_12035052	26.884	<lmxll>	{0-}	76	90	0	1.18	1	-
RaLG5	BPPCT-037	27.52	<lmxll>	{0-}	75	91	0	1.54	1	-
RaLG5	s5_12874828	29.619	<lmxll>	{0-}	75	89	2	1.2	1	-
RaLG5	s5_12784379	29.924	<lmxll>	{0-}	75	91	0	1.54	1	-
RaLG5	s5_13008786	31.852	<lmxll>	{0-}	78	87	1	0.49	1	-
RaLG5	s5_13291324	31.867	<lmxll>	{0-}	78	88	0	0.6	1	-
RaLG5	s5_13215786	32.007	<lmxll>	{0-}	78	86	2	0.39	1	-
RaLG5	s5_13311336	32.425	<lmxll>	{0-}	79	86	1	0.3	1	-
RaLG5	s5_13507676	33.226	<lmxll>	{0-}	78	84	4	0.22	1	-
RaLG5	s5_13843020	37.017	<lmxll>	{0-}	80	84	2	0.1	1	-
RaLG5	s5_13859152	38.344	<lmxll>	{0-}	80	86	0	0.22	1	-
RaLG5	s5_14174060	39.248	<lmxll>	{0-}	81	78	7	0.06	1	-
RaLG5	s5_14180472	39.63	<lmxll>	{0-}	82	84	0	0.02	1	-
RaLG5	s5_14241081	41.314	<lmxll>	{0-}	82	76	8	0.23	1	-
RaLG5	s5_14294597	41.905	<lmxll>	{0-}	84	74	8	0.63	1	-
RaLG5	BPPCT-038	43.415	<lmxll>	{0-}	84	82	0	0.02	1	-
RaLG5	s5_14934878	45.116	<lmxll>	{0-}	85	76	5	0.5	1	-
RaLG5	s5_14935123	45.369	<lmxll>	{0-}	85	77	4	0.4	1	-
RaLG5	s5_15044200	46.477	<lmxll>	{0-}	85	80	1	0.15	1	-
RaLG5	EMPaS-14	46.485	<lmxll>	{0-}	85	81	0	0.1	1	-
RaLG5	s5_15253761	46.81	<lmxll>	{0-}	84	76	6	0.4	1	-
RaLG5	s5_15120020	47.074	<lmxll>	{0-}	84	75	7	0.51	1	-
RaLG5	s5_15306167	47.076	<lmxll>	{0-}	84	81	1	0.05	1	-
RaLG5	s5_15094355	47.077	<lmxll>	{0-}	84	81	1	0.05	1	-
RaLG5	s5_15306287	47.078	<lmxll>	{0-}	84	81	1	0.05	1	-
RaLG5	s5_15138839	47.082	<lmxll>	{0-}	84	82	0	0.02	1	-
RaLG5	s5_15606060	48.349	<lmxll>	{0-}	84	82	0	0.02	1	-
RaLG5	s5_15923929	52.426	<lmxll>	{0-}	81	81	4	0	1	-
RaLG5	s5_16355934	52.755	<lmxll>	{0-}	81	85	0	0.1	1	-
RaLG5	s5_16372159	52.775	<lmxll>	{0-}	81	81	4	0	1	-
RaLG5	s5_17116581	57.326	<lmxll>	{0-}	82	81	3	0.01	1	-
RaLG5	s5_16980917	57.616	<lmxll>	{0-}	81	83	2	0.02	1	-
RaLG5	s5_17269821	57.701	<lmxll>	{0-}	81	82	3	0.01	1	-
RaLG5	s5_17062870	57.727	<lmxll>	{0-}	81	85	0	0.1	1	-
RaLG5	s5_16321505	58.016	<lmxll>	{0-}	78	76	12	0.03	1	-
RaLG5	s5_16852601	58.329	<lmxll>	{0-}	80	86	0	0.22	1	-
RaLG5	s5_17659161	59.244	<lmxll>	{0-}	80	84	2	0.1	1	-
RaLG5	s5_17573812	59.362	<lmxll>	{0-}	80	82	4	0.02	1	-
RaLG5	s5_17402195	59.491	<lmxll>	{0-}	80	86	0	0.22	1	-
RaLG5	s5_17574501	59.509	<lmxll>	{0-}	80	85	1	0.15	1	-
RaLG5	s1_23216631	59.716	<lmxll>	{0-}	76	73	17	0.06	1	-
RaLG5	s5_17876167	59.721	<lmxll>	{0-}	78	75	13	0.06	1	-
RaLG5	s5_17750346	59.863	<lmxll>	{0-}	77	74	15	0.06	1	-
RaLG5	s5_18178889	59.873	<lmxll>	{0-}	81	80	5	0.01	1	-
RaLG5	s5_18370425	60.04	<lmxll>	{0-}	81	85	0	0.1	1	-
RaLG5	s5_18364486	60.061	<lmxll>	{0-}	80	85	1	0.15	1	-
RaLG5	s5_18336406	60.061	<lmxll>	{0-}	81	80	5	0.01	1	-
RaLG5	s5_18418015	60.1	<lmxll>	{0-}	81	82	3	0.01	1	-
RaLG5	s5_17920730	60.119	<lmxll>	{0-}	81	81	4	0	1	-
RaLG6	s6_953503	0	<lmxll>	{0-}	90	70	6	2.5	1	-
RaLG6	s6_939619	0.096	<lmxll>	{1-}	74	81	11	0.32	1	-
RaLG6	s6_813916	0.193	<lmxll>	{0-}	91	74	1	1.75	1	-
RaLG6	s6_953481	0.46	<lmxll>	{1-}	75	87	4	0.89	1	-
RaLG6	s6_4414263	1.482	<lmxll>	{0-}	91	75	0	1.54	1	-
RaLG6	s6_4329192	1.628	<lmxll>	{1-}	75	90	1	1.36	1	-
RaLG6	s6_2842360	4.572	<lmxll>	{1-}	74	92	0	1.95	1	-
RaLG6	s6_3335499	4.572	<lmxll>	{0-}	92	74	0	1.95	1	-
RaLG6	s6_3070552	5.19	<lmxll>	{1-}	73	93	0	2.41	1	-
RaLG6	s6_3717000	5.19	<lmxll>	{0-}	93	73	0	2.41	1	-
RaLG6	s6_2002523	8.813	<lmxll>	{0-}	95	69	2	4.12	1	**
RaLG6	s6_1764223	8.815	<lmxll>	{0-}	95	69	2	4.12	1	**
RaLG6	s6_2630030	8.821	<lmxll>	{0-}	94	66	6	4.9	1	**
RaLG6	s6_2557368	8.824	<lmxll>	{1-}	71	94	1	3.21	1	*
RaLG6	s6_2205976	8.825	<lmxll>	{0-}	95	70	1	3.79	1	*
RaLG6	s6_2205915	8.825	<lmxll>	{0-}	95	70	1	3.79	1	*
RaLG6	s6_2226015	8.835	<lmxll>	{0-}	95	71	0	3.47	1	*
RaLG6	s6_1493883	9.956	<lmxll>	{0-}	93	72	1	2.67	1	-
RaLG6	s6_1351835	11.212	<lmxll>	{0-}	91	74	1	1.75	1	-
RaLG6	s6_610667	11.608	<lmxll>	{0-}	92	73	1	2.19	1	-
RaLG6	s6_4645424	11.615	<lmxll>	{0-}	92	73	1	2.19	1	-
RaLG6	s6_4570814	11.748	<lmxll>	{0-}	92	73	1	2.19	1	-
RaLG6	s6_472822	11.785	<lmxll>	{0-}	92	73	1	2.19	1	-
RaLG6	s6_473011	11.827	<lmxll>	{0-}	92	74	0	1.95	1	-
RaLG6	s6_472960	11.839	<lmxll>	{0-}	92	72	2	2.44	1	-
RaLG6	s6_4639702	12.466	<lmxll>	{0-}	91	74	1	1.75	1	-
RaLG6	s6_4832761	13.053	<lmxll>	{0-}	90	76	0	1.18	1	-
RaLG6	s6_4991729	13.673	<lmxll>	{0-}	91	75	0	1.54	1	-
RaLG6	s6_5059268	14.294	<lmxll>	{0-}	90	76	0	1.18	1	-
RaLG6	s6_5147321	14.913	<lmxll>	{0-}	89	77	0	0.87	1	-
RaLG6	s6_5144797	14.921	<lmxll>	{0-}	89	76	1	1.02	1	-
RaLG6	s6_5383318	15.316	<lmxll>	{0-}	88	69	9	2.3	1	-
RaLG6	s6_5391830	15.535	<lmxll>	{0-}	88	78	0	0.6	1	-
RaLG6	s6_5881398	15.535	<lmxll>	{1-}	78	88	0	0.6	1	-
RaLG6	s6_5462434	15.545	<lmxll>	{0-}	88	77	1	0.73	1	-
RaLG6	s6_6089367	15.545	<lmxll>	{1-}	78	87	1	0.49	1	-
RaLG6	s6_7248921	23.077	<lmxll>	{0-}	82	84	0	0.02	1	-
RaLG6	EMPaS-01	23.077	<lmxll>	{1-}	84	82	0	0.02	1	-
RaLG6	s6_7248985	23.098	<lmxll>	{0-}	82	83	1	0.01	1	-
RaLG6	s6_7076378	23.214	<lmxll>	{1-}	84	81	1	0.05	1	-
RaLG6	s6_7212794	23.723	<lmxll>	{0-}	83	82	1	0.01	1	-
RaLG6	s6_8795745	33.36	<lmxll>	{0-}	90	76	0	1.18	1	-
RaLG6	s6_8900719	33.367	<lmxll>	{0-}	89	76	1	1.02	1	-
RaLG6	s6_10261093	34.533	<lmxll>	{0-}	83	69	14	1.29	1	-
RaLG6	s6_11070239	38.279	<lmxll>	{1-}	78	88	0	0.6	1	-
RaLG6	s6_11846158	38.284	<lmxll>	{1-}	78	86	2	0.39	1	-
RaLG6	s6_9991105	38.296	<lmxll>	{1-}	78	85	3	0.3	1	-
RaLG6	s6_11068712	38.375	<lmxll>	{1-}	78	79	9	0.01	1	-
RaLG6	s6_9993620	38.404	<lmxll>	{1-}	78	83	5	0.16	1	-
RaLG6	s6_11165633	38.613	<lmxll>	{1-}	78	74	14	0.11	1	-
RaLG6	s6_11068807	39.663	<lmxll>	{1-}	80	78	8	0.03	1	-
RaLG6	s6_11068840	39.669	<lmxll>	{1-}	79	78	9	0.01	1	-
RaLG6	s6_14848965	45.654	<lmxll>	{1-}	78	84	4	0.22	1	-
RaLG6	s6_16253391	48.06	<lmxll>	{1-}	74	91	1	1.75	1	-
RaLG6	s6_16986857	50.345	<lmxll>	{1-}	75	88	3	1.04	1	-
RaLG6	s6_17518036	51.299	<lmxll>	{1-}	77	85	4	0.4	1	-
RaLG6	s6_17519700	51.428	<lmxll>	{1-}	77	87	2	0.61	1	-
RaLG6	s6_17297466	51.428	<lmxll>	{1-}	77	88	1	0.73	1	-
RaLG6	s6_17581556	51.515	<lmxll>	{1-}	77	87	2	0.61	1	-
RaLG6	s6_17702145	52.691	<lmxll>	{1-}	75	88	3	1.04	1	-
RaLG6	s6_18565028	53.313	<lmxll>	{1-}	74	92	0	1.95	1	-
RaLG6	s6_17589193	53.606	<lmxll>	{1-}	73	85	8	0.91	1	-
RaLG6	s6_20710688	58.501	<lmxll>	{1-}	72	94	0	2.92	1	*
RaLG6	s6_20604077	59.149	<lmxll>	{1-}	73	90	3	1.77	1	-
RaLG6	s6_22735786	63.562	<lmxll>	{1-}	72	86	8	1.24	1	-
RaLG6	s6_22659585	63.628	<lmxll>	{1-}	72	89	5	1.8	1	-
RaLG6	s6_22759256	64.113	<lmxll>	{1-}	72	84	10	0.92	1	-
RaLG6	s6_25355347	70.138	<lmxll>	{0-}	91	71	4	2.47	1	-
RaLG6	s6_25684848	71.073	<lmxll>	{0-}	90	72	4	2	1	-
RaLG6	s6_26118148	72.178	<lmxll>	{0-}	90	74	2	1.56	1	-
RaLG6	s6_26102923	72.273	<lmxll>	{0-}	90	76	0	1.18	1	-
RaLG6	s6_27371082	72.883	<lmxll>	{0-}	89	77	0	0.87	1	-
RaLG6	s6_26238831	72.895	<lmxll>	{0-}	89	76	1	1.02	1	-
RaLG6	s6_26189627	72.895	<lmxll>	{0-}	89	76	1	1.02	1	-
RaLG6	s6_26951665	72.902	<lmxll>	{0-}	88	77	1	0.73	1	-
RaLG6	s6_26407074	72.912	<lmxll>	{0-}	88	72	6	1.6	1	-
RaLG6	s6_26407153	72.942	<lmxll>	{0-}	89	73	4	1.58	1	-
RaLG6	s6_26187095	72.953	<lmxll>	{0-}	88	73	5	1.4	1	-
RaLG6	s6_28549234	72.967	<lmxll>	{0-}	89	69	8	2.53	1	-
RaLG7	CPPCT-033	0	<lmxll>	{1-}	40	40	86	0	1	-
RaLG7	s7_16812740	2.222	<lmxll>	{0-}	69	95	2	4.12	1	**
RaLG7	s7_17986610	6.57	<lmxll>	{0-}	67	84	15	1.91	1	-
RaLG7	s7_17978335	6.813	<lmxll>	{0-}	68	94	4	4.17	1	**
RaLG7	MA020	8.039	<lmxll>	{0-}	68	98	0	5.42	1	**
RaLG7	UCD-CH14	10.584	<lmxll>	{0-}	68	98	0	5.42	1	**
RaLG7	s7_18392279	13.812	<lmxll>	{0-}	65	94	7	5.29	1	**
RaLG7	s7_18448211	15.681	<lmxll>	{0-}	66	100	0	6.96	1	**
RaLG7	s7_18481353	18.866	<lmxll>	{0-}	69	97	0	4.72	1	**
RaLG7	s7_18481431	19.712	<lmxll>	{0-}	71	95	0	3.47	1	*
RaLG7	s7_19230415	27.126	<lmxll>	{0-}	71	95	0	3.47	1	*
RaLG7	s7_19230401	28.776	<lmxll>	{0-}	68	89	9	2.81	1	*
RaLG7	s7_19328023	29.445	<lmxll>	{0-}	67	99	0	6.17	1	**
RaLG7	s7_19860728	30.714	<lmxll>	{0-}	69	97	0	4.72	1	**
RaLG7	s7_19974713	31.98	<lmxll>	{0-}	71	95	0	3.47	1	*
RaLG7	s7_20075064	32.827	<lmxll>	{0-}	72	91	3	2.21	1	-
RaLG7	s7_20428302	35.027	<lmxll>	{0-}	74	92	0	1.95	1	-
RaLG7	s7_20918923	35.967	<lmxll>	{0-}	74	92	0	1.95	1	-
RaLG7	s7_21060831	36.633	<lmxll>	{0-}	75	86	5	0.75	1	-
RaLG7	s7_20394461	38.277	<lmxll>	{0-}	78	83	5	0.16	1	-
RaLG7	s7_21139437	38.355	<lmxll>	{0-}	77	73	16	0.11	1	-
RaLG7	s7_21672951	38.612	<lmxll>	{0-}	78	78	10	0	1	-
RaLG8	s8_421739	0	<lmxll>	{0-}	80	86	0	0.22	1	-
RaLG8	s8_718891	1.288	<lmxll>	{0-}	82	84	0	0.02	1	-
RaLG8	s8_556456	1.31	<lmxll>	{0-}	82	80	4	0.02	1	-
RaLG8	s7_16574776	4.878	<lmxll>	{0-}	82	84	0	0.02	1	-
RaLG8	s8_2157196	5.17	<lmxll>	{0-}	82	81	3	0.01	1	-
RaLG8	s8_1997024	5.48	<lmxll>	{0-}	83	82	1	0.01	1	-
RaLG8	s8_2372929	6.674	<lmxll>	{0-}	83	68	15	1.49	1	-
RaLG8	s8_2567357	6.68	<lmxll>	{0-}	83	83	0	0	1	-
RaLG8	s8_2838287	7.849	<lmxll>	{0-}	83	81	2	0.02	1	-
RaLG8	s8_2962383	7.88	<lmxll>	{0-}	83	83	0	0	1	-
RaLG8	s8_3213345	8.335	<lmxll>	{0-}	81	74	11	0.32	1	-
RaLG8	s8_3743630	9.604	<lmxll>	{0-}	83	74	9	0.52	1	-
RaLG8	s8_4534514	10.708	<lmxll>	{0-}	86	77	3	0.5	1	-
RaLG8	s8_4536200	11.208	<lmxll>	{0-}	85	81	0	0.1	1	-
RaLG8	s8_4515583	11.256	<lmxll>	{0-}	85	79	2	0.22	1	-
RaLG8	s8_4390107	11.474	<lmxll>	{0-}	85	78	3	0.3	1	-
RaLG8	s8_5342958	11.779	<lmxll>	{0-}	86	79	1	0.3	1	-
RaLG8	s8_5343038	11.779	<lmxll>	{0-}	86	79	1	0.3	1	-
RaLG8	s8_5071522	11.78	<lmxll>	{0-}	86	80	0	0.22	1	-
RaLG8	s8_5817068	13.634	<lmxll>	{0-}	84	77	5	0.3	1	-
RaLG8	s8_8886482	13.879	<lmxll>	{0-}	84	80	2	0.1	1	-
RaLG8	s8_9005717	14.805	<lmxll>	{0-}	85	73	8	0.91	1	-
RaLG8	s8_8054123	16.53	<lmxll>	{0-}	84	82	0	0.02	1	-
RaLG8	s8_8083234	16.55	<lmxll>	{0-}	84	80	2	0.1	1	-
RaLG8	s8_7292804	19.709	<lmxll>	{0-}	85	78	3	0.3	1	-
RaLG8	s8_11160044	25.034	<lmxll>	{0-}	80	85	1	0.15	1	-
RaLG8	s8_11538664	26.134	<lmxll>	{0-}	80	86	0	0.22	1	-
RaLG8	s8_11548517	26.184	<lmxll>	{0-}	80	82	4	0.02	1	-
RaLG8	s8_12178533	29.709	<lmxll>	{0-}	78	88	0	0.6	1	-
RaLG8	s8_13650238	30.344	<lmxll>	{0-}	79	87	0	0.39	1	-
RaLG8	s8_14266654	33.504	<lmxll>	{0-}	80	86	0	0.22	1	-
RaLG8	s8_14684738	34.059	<lmxll>	{0-}	81	84	1	0.05	1	-
RaLG8	EMPA-018	34.148	<lmxll>	{0-}	81	85	0	0.1	1	-
RaLG8	s8_14825086	34.159	<lmxll>	{0-}	81	84	1	0.05	1	-
RaLG8	s8_14684659	34.171	<lmxll>	{0-}	81	83	2	0.02	1	-
RaLG8	s8_14800416	34.791	<lmxll>	{0-}	82	84	0	0.02	1	-
RaLG8	s8_14984887	37.332	<lmxll>	{0-}	84	82	0	0.02	1	-
RaLG8	s8_15078212	39.264	<lmxll>	{0-}	87	76	3	0.74	1	-
RaLG8	s8_16924231	45.756	<lmxll>	{1-}	79	87	0	0.39	1	-
RaLG8	s8_17360959	46.197	<lmxll>	{1-}	79	76	11	0.06	1	-
RaLG8	s8_17430748	46.4	<lmxll>	{1-}	80	86	0	0.22	1	-
RaLG8	s8_17622545	46.402	<lmxll>	{1-}	80	85	1	0.15	1	-
RaLG8	s8_18154877	54.427	<lmxll>	{1-}	84	80	2	0.1	1	-
RaLG8	s8_18877572	57.043	<lmxll>	{1-}	89	77	0	0.87	1	-
RaLG8	s8_18689322	57.05	<lmxll>	{1-}	89	76	1	1.02	1	-
RaLG8	s8_18877516	57.647	<lmxll>	{1-}	90	76	0	1.18	1	-
RaLG8	s8_18874819	57.655	<lmxll>	{1-}	90	75	1	1.36	1	-
RaLG8	s8_19452527	61.953	<lmxll>	{1-}	91	75	0	1.54	1	-
RaLG8	s8_19452379	61.982	<lmxll>	{1-}	91	73	2	1.98	1	-
RaLG8	s8_20436374	66.588	<lmxll>	{1-}	93	71	2	2.95	1	*
RaLG8	s8_20893960	66.724	<lmxll>	{1-}	93	73	0	2.41	1	-
RaLG8	s8_21416042	66.75	<lmxll>	{1-}	93	72	1	2.67	1	-
RaLG8	s8_20870745	66.75	<lmxll>	{1-}	93	72	1	2.67	1	-
RaLG8	s8_21371619	66.75	<lmxll>	{1-}	93	72	1	2.67	1	-

## Sheet: Rivedel
S4 Table. Markers mapped in 'Rainier', 'Rivedel' and consensus maps, including the linkage group and map position to which they were located.
LG	Marker	Position (cM)	Segregation	Phase	nn	np	--	X2	Df	Signif.
RiLG1	s1_1839844	0	<nnxnp>	{-0}	70	95	1	3.79	1	*
RiLG1	s1_1541669	0.033	<nnxnp>	{-0}	70	96	0	4.07	1	**
RiLG1	s1_1761660	0.101	<nnxnp>	{-0}	68	89	9	2.81	1	*
RiLG1	s1_1761297	0.13	<nnxnp>	{-0}	67	88	11	2.85	1	*
RiLG1	s1_575621	0.278	<nnxnp>	{-0}	70	85	11	1.45	1	-
RiLG1	s1_3284707	4.744	<nnxnp>	{-0}	74	78	14	0.11	1	-
RiLG1	s1_3443665	5.646	<nnxnp>	{-0}	73	83	10	0.64	1	-
RiLG1	s1_4029063	7.624	<nnxnp>	{-0}	74	77	15	0.06	1	-
RiLG1	s1_3637714	8.076	<nnxnp>	{-0}	75	91	0	1.54	1	-
RiLG1	s1_7819825	19.216	<nnxnp>	{-0}	75	76	15	0.01	1	-
RiLG1	UDAp-415	19.474	<nnxnp>	{-1}	40	42	84	0.05	1	-
RiLG1	s1_7564699	20.468	<nnxnp>	{-0}	77	87	2	0.61	1	-
RiLG1	s1_7570604	20.496	<nnxnp>	{-0}	77	88	1	0.73	1	-
RiLG1	s1_7647620	20.52	<nnxnp>	{-0}	77	88	1	0.73	1	-
RiLG1	s1_7516783	20.522	<nnxnp>	{-0}	77	89	0	0.87	1	-
RiLG1	s1_7964970	20.884	<nnxnp>	{-0}	75	81	10	0.23	1	-
RiLG1	s1_8027520	22.38	<nnxnp>	{-1}	88	77	1	0.73	1	-
RiLG1	s1_8027649	22.409	<nnxnp>	{-1}	88	78	0	0.6	1	-
RiLG1	s1_8813976	24.586	<nnxnp>	{-1}	88	78	0	0.6	1	-
RiLG1	s1_9209151	25.866	<nnxnp>	{-1}	90	76	0	1.18	1	-
RiLG1	s1_765148	26.514	<nnxnp>	{-1}	89	77	0	0.87	1	-
RiLG1	s1_10642022	33.12	<nnxnp>	{-0}	80	79	7	0.01	1	-
RiLG1	s1_10659420	33.156	<nnxnp>	{-0}	80	83	3	0.06	1	-
RiLG1	s1_10866255	33.692	<nnxnp>	{-1}	87	75	4	0.89	1	-
RiLG1	s1_10875237	33.738	<nnxnp>	{-1}	87	79	0	0.39	1	-
RiLG1	s1_11012864	35.44	<nnxnp>	{-0}	78	88	0	0.6	1	-
RiLG1	s1_11237658	36.628	<nnxnp>	{-0}	76	85	5	0.5	1	-
RiLG1	s1_11226569	36.635	<nnxnp>	{-0}	78	85	3	0.3	1	-
RiLG1	s1_12284952	38.575	<nnxnp>	{-0}	79	83	4	0.1	1	-
RiLG1	s1_12159049	38.851	<nnxnp>	{-0}	78	86	2	0.39	1	-
RiLG1	s1_23504633	39.575	<nnxnp>	{-0}	77	86	3	0.5	1	-
RiLG1	s1_15086404	39.616	<nnxnp>	{-1}	89	76	1	1.02	1	-
RiLG1	s1_11650430	39.617	<nnxnp>	{-1}	89	77	0	0.87	1	-
RiLG1	s1_12181482	39.617	<nnxnp>	{-0}	77	89	0	0.87	1	-
RiLG1	s1_15071820	39.866	<nnxnp>	{-1}	89	76	1	1.02	1	-
RiLG1	s6_17833473	40.226	<nnxnp>	{-0}	78	88	0	0.6	1	-
RiLG1	s1_22820703	40.803	<nnxnp>	{-0}	77	89	0	0.87	1	-
RiLG1	s1_22814513	40.805	<nnxnp>	{-0}	77	88	1	0.73	1	-
RiLG1	s1_24964192	42.569	<nnxnp>	{-0}	80	86	0	0.22	1	-
RiLG1	s1_25100316	42.569	<nnxnp>	{-1}	86	80	0	0.22	1	-
RiLG1	s1_25150700	42.766	<nnxnp>	{-0}	80	84	2	0.1	1	-
RiLG1	s1_25640019	43.647	<nnxnp>	{-0}	82	84	0	0.02	1	-
RiLG1	s1_25667115	43.711	<nnxnp>	{-0}	82	81	3	0.01	1	-
RiLG1	s1_25762332	44.351	<nnxnp>	{-1}	85	73	8	0.91	1	-
RiLG1	s1_25733032	44.425	<nnxnp>	{-1}	85	77	4	0.4	1	-
RiLG1	s1_25924201	45.458	<nnxnp>	{-1}	85	81	0	0.1	1	-
RiLG1	s1_25919451	45.473	<nnxnp>	{-0}	81	84	1	0.05	1	-
RiLG1	UDAp-414	46.894	<nnxnp>	{-1}	44	49	73	0.27	1	-
RiLG1	s1_26370947	47.283	<nnxnp>	{-0}	82	84	0	0.02	1	-
RiLG1	s1_27273529	51	<nnxnp>	{-0}	83	75	8	0.41	1	-
RiLG1	EMPA-016	52.806	<nnxnp>	{-0}	49	39	78	1.14	1	-
RiLG1	s1_29890299	62.06	<nnxnp>	{-0}	82	80	4	0.02	1	-
RiLG1	s1_29550078	62.084	<nnxnp>	{-0}	81	73	12	0.42	1	-
RiLG1	s1_29548379	62.103	<nnxnp>	{-0}	82	81	3	0.01	1	-
RiLG1	s1_29670521	62.103	<nnxnp>	{-0}	82	81	3	0.01	1	-
RiLG1	s1_29363919	62.2	<nnxnp>	{-0}	82	84	0	0.02	1	-
RiLG1	s1_29771883	62.825	<nnxnp>	{-0}	79	75	12	0.1	1	-
RiLG1	s1_29965530	63.259	<nnxnp>	{-0}	82	82	2	0	1	-
RiLG1	s1_29660520	63.653	<nnxnp>	{-0}	82	77	7	0.16	1	-
RiLG1	s1_30949986	67.314	<nnxnp>	{-0}	81	85	0	0.1	1	-
RiLG1	s1_31316348	71.337	<nnxnp>	{-0}	79	84	3	0.15	1	-
RiLG1	s1_31388495	71.369	<nnxnp>	{-0}	79	87	0	0.39	1	-
RiLG1	s1_31605578	72.644	<nnxnp>	{-0}	81	85	0	0.1	1	-
RiLG1	s1_32050057	73.932	<nnxnp>	{-0}	81	85	0	0.1	1	-
RiLG1	s1_31650343	73.943	<nnxnp>	{-0}	81	83	2	0.02	1	-
RiLG1	s1_32211995	74.57	<nnxnp>	{-0}	80	86	0	0.22	1	-
RiLG1	s1_32785925	75.8	<nnxnp>	{-0}	80	86	0	0.22	1	-
RiLG1	PMS-67	76.435	<nnxnp>	{-0}	81	85	0	0.1	1	-
RiLG1	s1_33350516	76.805	<nnxnp>	{-0}	82	81	3	0.01	1	-
RiLG1	s1_33047596	77.07	<nnxnp>	{-0}	82	84	0	0.02	1	-
RiLG1	s1_32831905	77.09	<nnxnp>	{-0}	82	82	2	0	1	-
RiLG1	s1_33640442	79.215	<nnxnp>	{-0}	82	80	4	0.02	1	-
RiLG1	s1_36495759	85.741	<nnxnp>	{-1}	78	87	1	0.49	1	-
RiLG1	s1_36652912	87.419	<nnxnp>	{-1}	78	82	6	0.1	1	-
RiLG1	s1_36709583	87.904	<nnxnp>	{-1}	79	87	0	0.39	1	-
RiLG1	s1_36730111	88.559	<nnxnp>	{-1}	80	86	0	0.22	1	-
RiLG1	s1_37041277	94.242	<nnxnp>	{-1}	81	85	0	0.1	1	-
RiLG1	s1_37278419	95.521	<nnxnp>	{-0}	85	80	1	0.15	1	-
RiLG1	s1_37212039	95.527	<nnxnp>	{-1}	81	85	0	0.1	1	-
RiLG1	s1_37889266	97.756	<nnxnp>	{-0}	83	75	8	0.41	1	-
RiLG1	s1_39051424	100.911	<nnxnp>	{-0}	82	81	3	0.01	1	-
RiLG1	s1_39081865	100.966	<nnxnp>	{-0}	82	80	4	0.02	1	-
RiLG1	s1_38378468	101.141	<nnxnp>	{-0}	82	84	0	0.02	1	-
RiLG1	s1_38277187	101.528	<nnxnp>	{-0}	82	77	7	0.16	1	-
RiLG1	s1_38369307	101.774	<nnxnp>	{-0}	83	82	1	0.01	1	-
RiLG1	s1_38302378	102.029	<nnxnp>	{-0}	83	71	12	0.94	1	-
RiLG1	s1_39282772	105.568	<nnxnp>	{-1}	81	82	3	0.01	1	-
RiLG1	s1_39521216	106.603	<nnxnp>	{-1}	79	87	0	0.39	1	-
RiLG1	s1_39728842	109.151	<nnxnp>	{-0}	87	79	0	0.39	1	-
RiLG1	s1_39744944	109.293	<nnxnp>	{-0}	87	73	6	1.23	1	-
RiLG1	s1_39792608	109.724	<nnxnp>	{-1}	80	86	0	0.22	1	-
RiLG1	s1_40220931	110.34	<nnxnp>	{-0}	87	79	0	0.39	1	-
RiLG1	s1_40392121	110.34	<nnxnp>	{-1}	79	87	0	0.39	1	-
RiLG1	s1_39760956	110.367	<nnxnp>	{-1}	79	84	3	0.15	1	-
RiLG1	s1_39786051	110.6	<nnxnp>	{-1}	78	76	12	0.03	1	-
RiLG1	s1_41244985	116.546	<nnxnp>	{-1}	79	87	0	0.39	1	-
RiLG1	s1_41264204	118.011	<nnxnp>	{-1}	80	85	1	0.15	1	-
RiLG1	s1_46765766	122.683	<nnxnp>	{-0}	85	81	0	0.1	1	-
RiLG1	s1_45456733	128.222	<nnxnp>	{-1}	82	84	0	0.02	1	-
RiLG1	s1_44764873	128.222	<nnxnp>	{-0}	84	82	0	0.02	1	-
RiLG1	s1_44661638	128.267	<nnxnp>	{-1}	82	81	3	0.01	1	-
RiLG1	s1_44451902	129.327	<nnxnp>	{-1}	80	86	0	0.22	1	-
RiLG1	s1_44686492	129.367	<nnxnp>	{-0}	84	68	14	1.68	1	-
RiLG1	s1_44499877	130.692	<nnxnp>	{-1}	78	74	14	0.11	1	-
RiLG1	s1_43809646	130.714	<nnxnp>	{-1}	79	86	1	0.3	1	-
RiLG1	s1_44403793	130.816	<nnxnp>	{-0}	80	75	11	0.16	1	-
RiLG1	s1_43909967	131.027	<nnxnp>	{-0}	87	79	0	0.39	1	-
RiLG1	s1_43710227	131.027	<nnxnp>	{-1}	79	87	0	0.39	1	-
RiLG2	s2_10223626	0	<nnxnp>	{-0}	93	70	3	3.25	1	*
RiLG2	s2_9707702	0.589	<nnxnp>	{-1}	74	85	7	0.76	1	-
RiLG2	s8_4538115	0.662	<nnxnp>	{-0}	92	73	1	2.19	1	-
RiLG2	s2_664619	1.472	<nnxnp>	{-0}	91	75	0	1.54	1	-
RiLG2	s2_284900	1.658	<nnxnp>	{-0}	90	71	5	2.24	1	-
RiLG2	s2_8998014	1.694	<nnxnp>	{-0}	91	74	1	1.75	1	-
RiLG2	s2_206335	1.702	<nnxnp>	{-0}	91	75	0	1.54	1	-
RiLG2	s2_8997963	1.751	<nnxnp>	{-0}	91	69	6	3.02	1	*
RiLG2	s2_9253387	1.811	<nnxnp>	{-0}	89	70	7	2.27	1	-
RiLG2	s2_9413502	1.852	<nnxnp>	{-0}	90	75	1	1.36	1	-
RiLG2	s2_9100827	1.859	<nnxnp>	{-0}	90	76	0	1.18	1	-
RiLG2	s2_10223139	2.102	<nnxnp>	{-0}	92	74	0	1.95	1	-
RiLG2	s2_9872715	2.105	<nnxnp>	{-0}	92	70	4	2.99	1	*
RiLG2	s2_9273024	2.113	<nnxnp>	{-0}	92	68	6	3.6	1	*
RiLG2	s2_2301347	4.691	<nnxnp>	{-1}	77	89	0	0.87	1	-
RiLG2	s2_2427028	5.935	<nnxnp>	{-1}	77	89	0	0.87	1	-
RiLG2	s2_2975134	7.691	<nnxnp>	{-1}	78	88	0	0.6	1	-
RiLG2	s2_3822727	7.691	<nnxnp>	{-0}	88	78	0	0.6	1	-
RiLG2	s2_16521836	20.616	<nnxnp>	{-1}	75	91	0	1.54	1	-
RiLG2	s2_19199325	25.542	<nnxnp>	{-1}	81	83	2	0.02	1	-
RiLG2	s2_19047545	26.198	<nnxnp>	{-1}	80	85	1	0.15	1	-
RiLG2	s2_19332473	27.481	<nnxnp>	{-1}	80	86	0	0.22	1	-
RiLG2	s2_19591193	28.132	<nnxnp>	{-1}	81	84	1	0.05	1	-
RiLG2	s2_20290583	31.428	<nnxnp>	{-1}	82	84	0	0.02	1	-
RiLG2	s2_20417080	32.086	<nnxnp>	{-1}	83	83	0	0	1	-
RiLG2	s2_20266618	32.343	<nnxnp>	{-1}	81	69	16	0.96	1	-
RiLG2	s2_20486124	33.511	<nnxnp>	{-1}	83	81	2	0.02	1	-
RiLG2	s2_20921620	37.239	<nnxnp>	{-1}	83	83	0	0	1	-
RiLG2	UCD-CH11	41.818	<nnxnp>	{-1}	80	86	0	0.22	1	-
RiLG2	s2_21900771	46.173	<nnxnp>	{-0}	85	73	8	0.91	1	-
RiLG2	s2_22345474	46.247	<nnxnp>	{-0}	84	74	8	0.63	1	-
RiLG2	s2_22505538	48.61	<nnxnp>	{-0}	81	75	10	0.23	1	-
RiLG2	s2_22407394	48.741	<nnxnp>	{-0}	81	85	0	0.1	1	-
RiLG2	s2_22505376	48.902	<nnxnp>	{-0}	81	84	1	0.05	1	-
RiLG2	UCD-CH12	49.996	<nnxnp>	{-1}	87	79	0	0.39	1	-
RiLG2	s2_23065474	51.233	<nnxnp>	{-0}	81	84	1	0.05	1	-
RiLG2	s2_23061020	51.236	<nnxnp>	{-0}	81	85	0	0.1	1	-
RiLG2	s2_23431770	54.342	<nnxnp>	{-0}	80	86	0	0.22	1	-
RiLG2	s2_23443456	54.742	<nnxnp>	{-0}	79	80	7	0.01	1	-
RiLG2	s2_24091341	55.544	<nnxnp>	{-0}	78	88	0	0.6	1	-
RiLG2	s2_24196797	56.109	<nnxnp>	{-0}	79	86	1	0.3	1	-
RiLG2	s2_24153000	56.131	<nnxnp>	{-0}	79	87	0	0.39	1	-
RiLG2	s1_8514165	56.131	<nnxnp>	{-1}	87	79	0	0.39	1	-
RiLG2	s2_15547711	56.137	<nnxnp>	{-0}	78	83	5	0.16	1	-
RiLG2	s2_24196836	56.236	<nnxnp>	{-0}	79	86	1	0.3	1	-
RiLG2	s2_24533917	59.19	<nnxnp>	{-1}	88	78	0	0.6	1	-
RiLG2	s2_24581082	59.814	<nnxnp>	{-1}	86	73	7	1.06	1	-
RiLG2	s2_24711542	60.981	<nnxnp>	{-0}	81	85	0	0.1	1	-
RiLG2	s2_25114258	62.2	<nnxnp>	{-0}	83	83	0	0	1	-
RiLG2	UCD-CH21	62.827	<nnxnp>	{-0}	82	84	0	0.02	1	-
RiLG2	s2_25390769	62.849	<nnxnp>	{-1}	82	67	17	1.51	1	-
RiLG2	s2_25755225	62.86	<nnxnp>	{-1}	84	81	1	0.05	1	-
RiLG3	s3_1439825	0	<nnxnp>	{-0}	79	79	8	0	1	-
RiLG3	s3_512226	0.074	<nnxnp>	{-0}	79	87	0	0.39	1	-
RiLG3	s3_1439202	0.113	<nnxnp>	{-0}	79	86	1	0.3	1	-
RiLG3	s3_1440110	1.305	<nnxnp>	{-0}	79	82	5	0.06	1	-
RiLG3	s3_1615197	5.099	<nnxnp>	{-0}	79	78	9	0.01	1	-
RiLG3	s3_5416007	23.059	<nnxnp>	{-1}	80	85	1	0.15	1	-
RiLG3	s3_5812934	29.304	<nnxnp>	{-1}	74	92	0	1.95	1	-
RiLG3	s3_5602819	29.901	<nnxnp>	{-1}	73	89	4	1.58	1	-
RiLG3	s3_5616597	29.929	<nnxnp>	{-1}	73	93	0	2.41	1	-
RiLG3	s3_8480308	33.284	<nnxnp>	{-1}	74	92	0	1.95	1	-
RiLG3	s3_10737930	34.259	<nnxnp>	{-0}	94	72	0	2.92	1	*
RiLG3	s3_7663296	34.301	<nnxnp>	{-1}	72	88	6	1.6	1	-
RiLG3	s3_7604385	34.36	<nnxnp>	{-1}	72	94	0	2.92	1	*
RiLG3	s3_6781635	34.558	<nnxnp>	{-1}	72	92	2	2.44	1	-
RiLG3	s3_6781685	34.587	<nnxnp>	{-1}	72	92	2	2.44	1	-
RiLG3	s3_7320285	34.813	<nnxnp>	{-1}	71	94	1	3.21	1	*
RiLG3	s3_8552617	34.813	<nnxnp>	{-1}	71	95	0	3.47	1	*
RiLG3	s3_8552232	34.835	<nnxnp>	{-1}	70	92	4	2.99	1	*
RiLG3	s4_20443642	34.903	<nnxnp>	{-1}	69	83	14	1.29	1	-
RiLG3	s3_6777599	34.906	<nnxnp>	{-1}	72	94	0	2.92	1	*
RiLG3	s3_6355796	35.133	<nnxnp>	{-1}	73	93	0	2.41	1	-
RiLG3	s3_8498134	37.108	<nnxnp>	{-1}	75	91	0	1.54	1	-
RiLG3	s3_19208921	66.256	<nnxnp>	{-0}	95	69	2	4.12	1	**
RiLG3	s3_19139205	67.441	<nnxnp>	{-0}	93	68	5	3.88	1	**
RiLG3	s3_19180169	67.49	<nnxnp>	{-0}	93	70	3	3.25	1	*
RiLG3	s3_19396787	67.494	<nnxnp>	{-0}	93	70	3	3.25	1	*
RiLG3	s3_19210200	67.501	<nnxnp>	{-0}	93	72	1	2.67	1	-
RiLG3	s3_19396742	67.528	<nnxnp>	{-0}	93	73	0	2.41	1	-
RiLG3	s3_19790245	68.718	<nnxnp>	{-0}	95	68	3	4.47	1	**
RiLG3	s3_19894677	69.967	<nnxnp>	{-0}	93	73	0	2.41	1	-
RiLG3	s3_19953469	69.974	<nnxnp>	{-0}	93	72	1	2.67	1	-
RiLG3	s3_20479270	75.415	<nnxnp>	{-0}	90	76	0	1.18	1	-
RiLG3	s3_20638122	77.58	<nnxnp>	{-0}	88	68	10	2.56	1	-
RiLG3	s3_20844524	78.04	<nnxnp>	{-0}	89	69	8	2.53	1	-
RiLG3	s3_21639696	78.204	<nnxnp>	{-0}	86	68	12	2.1	1	-
RiLG3	s4_1630167	78.404	<nnxnp>	{-0}	72	77	17	0.17	1	-
RiLG4	s4_377231	0	<nnxnp>	{-1}	88	73	5	1.4	1	-
RiLG4	s4_266996	0.161	<nnxnp>	{-1}	88	70	8	2.05	1	-
RiLG4	s4_570056	0.728	<nnxnp>	{-1}	87	79	0	0.39	1	-
RiLG4	s4_908792	1.588	<nnxnp>	{-1}	87	79	0	0.39	1	-
RiLG4	s4_1096650	2.215	<nnxnp>	{-0}	80	86	0	0.22	1	-
RiLG4	s4_1287822	2.215	<nnxnp>	{-1}	86	80	0	0.22	1	-
RiLG4	s4_1119110	2.839	<nnxnp>	{-1}	87	79	0	0.39	1	-
RiLG4	s4_2520451	6.779	<nnxnp>	{-1}	89	75	2	1.2	1	-
RiLG4	s4_2242835	7.366	<nnxnp>	{-1}	88	78	0	0.6	1	-
RiLG4	s4_2520537	7.897	<nnxnp>	{-1}	89	76	1	1.02	1	-
RiLG4	s4_2460809	7.908	<nnxnp>	{-0}	77	87	2	0.61	1	-
RiLG4	s4_2515057	7.923	<nnxnp>	{-1}	89	76	1	1.02	1	-
RiLG4	s4_2532255	7.94	<nnxnp>	{-1}	89	77	0	0.87	1	-
RiLG4	s4_2186321	8.084	<nnxnp>	{-1}	88	64	14	3.79	1	*
RiLG4	s4_2928619	9.112	<nnxnp>	{-0}	75	91	0	1.54	1	-
RiLG4	s4_2971330	10.31	<nnxnp>	{-0}	73	93	0	2.41	1	-
RiLG4	s4_3161835	10.908	<nnxnp>	{-0}	72	94	0	2.92	1	*
RiLG4	s4_4473020	16.606	<nnxnp>	{-0}	70	89	7	2.27	1	-
RiLG4	s4_4414340	17.212	<nnxnp>	{-1}	97	68	1	5.1	1	**
RiLG4	s4_4692417	17.795	<nnxnp>	{-1}	98	68	0	5.42	1	**
RiLG4	s4_6384995	17.795	<nnxnp>	{-0}	68	98	0	5.42	1	**
RiLG4	s4_4772903	17.808	<nnxnp>	{-0}	68	95	3	4.47	1	**
RiLG4	s4_4773662	17.981	<nnxnp>	{-1}	98	66	2	6.24	1	**
RiLG4	s4_5172308	18.412	<nnxnp>	{-1}	97	69	0	4.72	1	**
RiLG4	s4_5172842	18.412	<nnxnp>	{-0}	69	97	0	4.72	1	**
RiLG4	s4_6350127	18.938	<nnxnp>	{-0}	70	95	1	3.79	1	*
RiLG4	s4_6176991	19.432	<nnxnp>	{-0}	69	94	3	3.83	1	*
RiLG4	s4_5333750	19.618	<nnxnp>	{-1}	97	69	0	4.72	1	**
RiLG4	s4_6292057	19.618	<nnxnp>	{-0}	69	97	0	4.72	1	**
RiLG4	s4_4458517	19.643	<nnxnp>	{-0}	68	94	4	4.17	1	**
RiLG4	s4_6512041	20.144	<nnxnp>	{-0}	68	97	1	5.1	1	**
RiLG4	s4_6967443	20.728	<nnxnp>	{-1}	95	71	0	3.47	1	*
RiLG4	s4_6264447	20.772	<nnxnp>	{-0}	71	91	4	2.47	1	-
RiLG4	s4_10301063	26.862	<nnxnp>	{-0}	67	89	10	3.1	1	*
RiLG4	s4_9662069	27.559	<nnxnp>	{-0}	66	99	1	6.6	1	**
RiLG4	s4_10405809	28.736	<nnxnp>	{-0}	66	97	3	5.9	1	**
RiLG4	s4_10443711	28.743	<nnxnp>	{-1}	100	66	0	6.96	1	**
RiLG4	s4_11035546	33.98	<nnxnp>	{-0}	70	95	1	3.79	1	*
RiLG4	s4_11033149	34.007	<nnxnp>	{-0}	70	96	0	4.07	1	**
RiLG4	s4_11128756	35.32	<nnxnp>	{-0}	70	96	0	4.07	1	**
RiLG4	s4_11210410	37.254	<nnxnp>	{-0}	71	95	0	3.47	1	*
RiLG4	s4_11212028	37.815	<nnxnp>	{-0}	72	90	4	2	1	-
RiLG4	s4_11264993	37.9	<nnxnp>	{-0}	72	94	0	2.92	1	*
RiLG4	s4_11294081	38.317	<nnxnp>	{-0}	72	88	6	1.6	1	-
RiLG4	s4_14145948	46.859	<nnxnp>	{-1}	98	68	0	5.42	1	**
RiLG4	s4_17082542	48.762	<nnxnp>	{-1}	97	69	0	4.72	1	**
RiLG4	s4_17074265	48.789	<nnxnp>	{-0}	69	95	2	4.12	1	**
RiLG4	s4_17747453	49.365	<nnxnp>	{-1}	96	70	0	4.07	1	**
RiLG4	s4_17428442	49.872	<nnxnp>	{-0}	69	92	5	3.29	1	*
RiLG4	s4_18437880	49.989	<nnxnp>	{-1}	97	69	0	4.72	1	**
RiLG4	s4_18375775	49.989	<nnxnp>	{-0}	69	97	0	4.72	1	**
RiLG4	s4_17897016	50.08	<nnxnp>	{-0}	69	96	1	4.42	1	**
RiLG4	s4_17932234	50.08	<nnxnp>	{-1}	97	68	1	5.1	1	**
RiLG4	s4_20549211	55.538	<nnxnp>	{-1}	93	63	10	5.77	1	**
RiLG4	s4_26850534	56.129	<nnxnp>	{-0}	71	94	1	3.21	1	*
RiLG4	s4_25996697	56.166	<nnxnp>	{-0}	71	93	2	2.95	1	*
RiLG5	s5_2516374	0	<nnxnp>	{-0}	70	96	0	4.07	1	**
RiLG5	s8_3543682	0.147	<nnxnp>	{-1}	93	68	5	3.88	1	**
RiLG5	s5_3597620	2.413	<nnxnp>	{-1}	96	70	0	4.07	1	**
RiLG5	s8_7842667	4.75	<nnxnp>	{-0}	68	98	0	5.42	1	**
RiLG5	s5_6244373	9.193	<nnxnp>	{-1}	94	72	0	2.92	1	*
RiLG5	s5_5434536	9.244	<nnxnp>	{-1}	93	65	8	4.96	1	**
RiLG5	s5_4732824	9.467	<nnxnp>	{-1}	95	71	0	3.47	1	*
RiLG5	s5_4996423	10.092	<nnxnp>	{-1}	94	72	0	2.92	1	*
RiLG5	s5_13626558	29.953	<nnxnp>	{-0}	74	86	6	0.9	1	-
RiLG5	s5_14415927	32.654	<nnxnp>	{-0}	75	82	9	0.31	1	-
RiLG5	s5_14294478	34.486	<nnxnp>	{-0}	73	92	1	2.19	1	-
RiLG5	s5_13706196	35.104	<nnxnp>	{-0}	69	97	0	4.72	1	**
RiLG5	s5_14441107	37.582	<nnxnp>	{-0}	70	89	7	2.27	1	-
RiLG5	s5_14502341	38.454	<nnxnp>	{-0}	71	95	0	3.47	1	*
RiLG5	s5_14706173	40.27	<nnxnp>	{-0}	72	91	3	2.21	1	-
RiLG5	BPPCT-038	40.312	<nnxnp>	{-0}	72	94	0	2.92	1	*
RiLG5	s5_15005383	41.41	<nnxnp>	{-0}	72	89	5	1.8	1	-
RiLG5	s5_15018254	41.521	<nnxnp>	{-0}	72	92	2	2.44	1	-
RiLG5	s5_15001660	41.54	<nnxnp>	{-0}	72	94	0	2.92	1	*
RiLG5	s5_15464031	43.301	<nnxnp>	{-0}	71	88	7	1.82	1	-
RiLG5	s5_15459470	43.48	<nnxnp>	{-0}	70	94	2	3.51	1	*
RiLG5	s5_16362370	46.35	<nnxnp>	{-0}	73	90	3	1.77	1	-
RiLG5	s5_16729547	47.862	<nnxnp>	{-0}	74	83	9	0.52	1	-
RiLG5	s5_16577425	47.901	<nnxnp>	{-0}	74	92	0	1.95	1	-
RiLG5	s5_16924932	48.708	<nnxnp>	{-0}	73	90	3	1.77	1	-
RiLG5	s5_17069677	49.369	<nnxnp>	{-0}	67	89	10	3.1	1	*
RiLG5	s5_16422823	49.611	<nnxnp>	{-0}	73	88	5	1.4	1	-
RiLG5	s5_17381684	52.774	<nnxnp>	{-0}	78	88	0	0.6	1	-
RiLG5	s5_17958065	55.713	<nnxnp>	{-0}	77	81	8	0.1	1	-
RiLG5	s5_18242570	56.136	<nnxnp>	{-0}	78	86	2	0.39	1	-
RiLG5	s5_17998251	56.24	<nnxnp>	{-0}	77	82	7	0.16	1	-
RiLG5	s5_18117356	56.355	<nnxnp>	{-0}	78	88	0	0.6	1	-
RiLG5	s5_18097112	56.423	<nnxnp>	{-0}	78	85	3	0.3	1	-
RiLG5	s5_18105080	59.775	<nnxnp>	{-0}	80	77	9	0.06	1	-
RiLG5	s5_18101706	59.806	<nnxnp>	{-0}	80	73	13	0.32	1	-
RiLG5	s5_18101688	59.988	<nnxnp>	{-0}	80	74	12	0.23	1	-
RiLG6	s6_4043826	0	<nnxnp>	{-1}	84	77	5	0.3	1	-
RiLG6	s6_863282	0.06	<nnxnp>	{-0}	81	83	2	0.02	1	-
RiLG6	s6_721991	0.063	<nnxnp>	{-0}	80	83	3	0.06	1	-
RiLG6	s6_831363	0.108	<nnxnp>	{-0}	81	85	0	0.1	1	-
RiLG6	s6_831408	0.261	<nnxnp>	{-0}	81	81	4	0	1	-
RiLG6	s6_721960	0.786	<nnxnp>	{-0}	82	80	4	0.02	1	-
RiLG6	s6_4245831	2.553	<nnxnp>	{-1}	83	79	4	0.1	1	-
RiLG6	s6_3511911	4.819	<nnxnp>	{-1}	85	79	2	0.22	1	-
RiLG6	s6_3244211	5.67	<nnxnp>	{-1}	84	80	2	0.1	1	-
RiLG6	s6_3789625	5.672	<nnxnp>	{-1}	84	82	0	0.02	1	-
RiLG6	CPSCT-002	5.998	<nnxnp>	{-0}	83	83	0	0	1	-
RiLG6	s6_2312275	6.563	<nnxnp>	{-1}	82	81	3	0.01	1	-
RiLG6	s6_2312282	6.88	<nnxnp>	{-0}	85	79	2	0.22	1	-
RiLG6	s6_2157551	8.013	<nnxnp>	{-1}	83	83	0	0	1	-
RiLG6	s6_1853295	10.759	<nnxnp>	{-0}	80	74	12	0.23	1	-
RiLG6	s6_1845874	11.271	<nnxnp>	{-0}	80	85	1	0.15	1	-
RiLG6	s6_329001	16.83	<nnxnp>	{-1}	83	81	2	0.02	1	-
RiLG6	s6_493025	18.17	<nnxnp>	{-0}	85	81	0	0.1	1	-
RiLG6	s6_655874	18.541	<nnxnp>	{-0}	85	74	7	0.76	1	-
RiLG6	s6_614051	18.613	<nnxnp>	{-0}	85	79	2	0.22	1	-
RiLG6	s6_4852620	21.601	<nnxnp>	{-0}	88	77	1	0.73	1	-
RiLG6	s6_5306358	23.599	<nnxnp>	{-1}	78	86	2	0.39	1	-
RiLG6	s6_5094301	24.708	<nnxnp>	{-0}	86	74	6	0.9	1	-
RiLG6	s6_6795605	28.112	<nnxnp>	{-1}	77	89	0	0.87	1	-
RiLG6	s6_7070366	28.329	<nnxnp>	{-1}	76	80	10	0.1	1	-
RiLG6	s6_7013688	31.015	<nnxnp>	{-1}	74	84	8	0.63	1	-
RiLG6	s6_7048387	33.159	<nnxnp>	{-1}	71	94	1	3.21	1	*
RiLG6	s6_7023093	33.176	<nnxnp>	{-1}	71	95	0	3.47	1	*
RiLG6	EMPaS-01	36.299	<nnxnp>	{-0}	98	68	0	5.42	1	**
RiLG6	s6_7518834	37.537	<nnxnp>	{-1}	68	98	0	5.42	1	**
RiLG6	s6_7570604	38.159	<nnxnp>	{-1}	69	97	0	4.72	1	**
RiLG6	s6_7940484	38.791	<nnxnp>	{-0}	98	68	0	5.42	1	**
RiLG6	s6_8105464	39.975	<nnxnp>	{-0}	98	68	0	5.42	1	**
RiLG6	s6_8127493	40.095	<nnxnp>	{-0}	98	64	4	7.14	1	***
RiLG6	s6_8306803	40.128	<nnxnp>	{-0}	97	62	7	7.7	1	***
RiLG6	s6_8365797	41.256	<nnxnp>	{-0}	100	65	1	7.42	1	***
RiLG6	s6_8679634	41.865	<nnxnp>	{-0}	101	65	0	7.81	1	***
RiLG6	s6_10071956	42.318	<nnxnp>	{-1}	66	94	6	4.9	1	**
RiLG6	s6_8303976	42.499	<nnxnp>	{-0}	100	64	2	7.9	1	****
RiLG6	s6_9629086	42.499	<nnxnp>	{-0}	99	66	1	6.6	1	**
RiLG6	s6_9824681	42.499	<nnxnp>	{-1}	66	99	1	6.6	1	**
RiLG6	s6_9273932	42.5	<nnxnp>	{-1}	66	100	0	6.96	1	***
RiLG6	s6_9273060	42.5	<nnxnp>	{-0}	100	66	0	6.96	1	***
RiLG6	s6_8999897	42.5	<nnxnp>	{-0}	100	64	2	7.9	1	****
RiLG6	s6_9700647	42.557	<nnxnp>	{-0}	100	65	1	7.42	1	***
RiLG6	s6_8633781	42.905	<nnxnp>	{-0}	100	57	9	11.78	1	*****
RiLG6	s6_10580074	45.536	<nnxnp>	{-1}	63	92	11	5.43	1	**
RiLG6	s6_11969302	49.405	<nnxnp>	{-1}	57	109	0	16.29	1	*******
RiLG6	EMPA-004	50.291	<nnxnp>	{-0}	66	31	69	12.63	1	******
RiLG6	CPPCT-029	50.711	<nnxnp>	{-1}	55	111	0	18.89	1	*******
RiLG6	s4_29077367	50.722	<nnxnp>	{-1}	55	110	1	18.33	1	*******
RiLG6	s6_18132714	51.369	<nnxnp>	{-1}	54	112	0	20.27	1	*******
RiLG6	s6_17911451	51.369	<nnxnp>	{-0}	112	54	0	20.27	1	*******
RiLG6	s6_18968864	53.908	<nnxnp>	{-0}	113	51	2	23.44	1	*******
RiLG6	pchcms5	56.279	<nnxnp>	{-1}	29	75	62	20.35	1	*******
RiLG6	s6_19324384	56.446	<nnxnp>	{-1}	48	116	2	28.2	1	*******
RiLG6	s6_19417685	56.685	<nnxnp>	{-1}	48	114	4	26.89	1	*******
RiLG6	s6_20257417	59.559	<nnxnp>	{-1}	43	123	0	38.55	1	*******
RiLG6	s6_20604032	60.197	<nnxnp>	{-1}	44	118	4	33.8	1	*******
RiLG6	s6_20604253	61.36	<nnxnp>	{-1}	41	114	11	34.38	1	*******
RiLG6	EPPCU-3090	61.45	<nnxnp>	{-1}	42	124	0	40.51	1	*******
RiLG6	s6_20982505	62.011	<nnxnp>	{-1}	41	125	0	42.51	1	*******
RiLG6	s6_20833817	62.048	<nnxnp>	{-1}	41	123	2	41	1	*******
RiLG6	s6_21557679	63.339	<nnxnp>	{-1}	39	125	2	45.1	1	*******
RiLG6	s6_21951287	66.447	<nnxnp>	{-1}	34	132	0	57.86	1	*******
RiLG6	s6_21947138	66.546	<nnxnp>	{-1}	34	127	5	53.72	1	*******
RiLG6	s6_22051798	67.478	<nnxnp>	{-1}	32	126	8	55.92	1	*******
RiLG6	s6_22457131	67.532	<nnxnp>	{-1}	32	127	7	56.76	1	*******
RiLG6	s6_22483847	67.75	<nnxnp>	{-1}	32	132	2	60.98	1	*******
RiLG6	s6_22568179	68.373	<nnxnp>	{-1}	31	134	1	64.3	1	*******
RiLG6	s6_22731316	69.587	<nnxnp>	{-1}	29	135	2	68.51	1	*******
RiLG6	s6_22796090	69.608	<nnxnp>	{-1}	29	137	0	70.27	1	*******
RiLG6	s6_22971318	72.034	<nnxnp>	{-1}	25	140	1	80.15	1	*******
RiLG6	s6_23205045	72.461	<nnxnp>	{-1}	24	134	8	76.58	1	*******
RiLG6	s6_23284441	72.622	<nnxnp>	{-1}	24	140	2	82.05	1	*******
RiLG6	s6_23198973	72.717	<nnxnp>	{-1}	24	139	3	81.13	1	*******
RiLG6	s6_23198953	73.441	<nnxnp>	{-1}	23	130	13	74.83	1	*******
RiLG6	s6_24221201	78.791	<nnxnp>	{-1}	14	147	5	109.87	1	*******
RiLG6	s6_24325917	78.937	<nnxnp>	{-1}	14	152	0	114.72	1	*******
RiLG6	s6_24222819	79.901	<nnxnp>	{-1}	12	152	2	119.51	1	*******
RiLG6	s6_24472912	80.1	<nnxnp>	{-1}	12	152	2	119.51	1	*******
RiLG6	s6_24477232	80.157	<nnxnp>	{-1}	12	152	2	119.51	1	*******
RiLG6	s6_24476450	80.254	<nnxnp>	{-1}	12	154	0	121.47	1	*******
RiLG6	s6_24413478	80.276	<nnxnp>	{-1}	12	150	4	117.56	1	*******
RiLG7	s7_9208237	0	<nnxnp>	{-0}	81	73	12	0.42	1	-
RiLG7	s7_8847523	0.179	<nnxnp>	{-0}	81	81	4	0	1	-
RiLG7	s7_7214138	0.186	<nnxnp>	{-0}	82	79	5	0.06	1	-
RiLG7	s7_8852295	0.192	<nnxnp>	{-0}	80	77	9	0.06	1	-
RiLG7	s7_8847486	0.243	<nnxnp>	{-0}	82	78	6	0.1	1	-
RiLG7	s2_22040051	0.61	<nnxnp>	{-0}	82	81	3	0.01	1	-
RiLG7	s7_8150180	0.855	<nnxnp>	{-0}	83	81	2	0.02	1	-
RiLG7	s7_7882206	0.901	<nnxnp>	{-0}	83	83	0	0	1	-
RiLG7	s7_7180846	0.951	<nnxnp>	{-0}	83	78	5	0.16	1	-
RiLG7	s7_8003480	1.032	<nnxnp>	{-0}	83	78	5	0.16	1	-
RiLG7	s5_16425183	1.175	<nnxnp>	{-0}	83	81	2	0.02	1	-
RiLG7	s7_8708734	2.067	<nnxnp>	{-0}	85	79	2	0.22	1	-
RiLG7	s7_8966163	2.694	<nnxnp>	{-0}	84	80	2	0.1	1	-
RiLG7	s7_8965414	2.925	<nnxnp>	{-0}	84	81	1	0.05	1	-
RiLG7	s7_9714288	3.958	<nnxnp>	{-0}	84	81	1	0.05	1	-
RiLG7	s7_9718023	3.976	<nnxnp>	{-0}	84	82	0	0.02	1	-
RiLG7	s7_10284537	7.291	<nnxnp>	{-0}	85	75	6	0.62	1	-
RiLG7	s7_11233991	10.775	<nnxnp>	{-0}	86	73	7	1.06	1	-
RiLG7	s6_28557638	10.909	<nnxnp>	{-0}	87	79	0	0.39	1	-
RiLG7	s7_11251086	11.5	<nnxnp>	{-0}	88	77	1	0.73	1	-
RiLG7	s7_12781408	11.511	<nnxnp>	{-0}	88	78	0	0.6	1	-
RiLG7	s7_12415495	11.603	<nnxnp>	{-0}	87	72	7	1.42	1	-
RiLG7	s7_12852652	12.112	<nnxnp>	{-0}	89	77	0	0.87	1	-
RiLG7	s7_12852693	12.173	<nnxnp>	{-0}	89	72	5	1.8	1	-
RiLG7	s7_12875275	12.573	<nnxnp>	{-0}	88	76	2	0.88	1	-
RiLG7	s7_13054323	13.43	<nnxnp>	{-0}	89	76	1	1.02	1	-
RiLG7	s7_13174662	14.522	<nnxnp>	{-1}	77	89	0	0.87	1	-
RiLG7	s7_13424047	15.747	<nnxnp>	{-0}	89	75	2	1.2	1	-
RiLG7	s7_13340043	15.75	<nnxnp>	{-0}	89	76	1	1.02	1	-
RiLG7	s7_13200273	15.751	<nnxnp>	{-1}	77	89	0	0.87	1	-
RiLG7	s7_13336515	15.751	<nnxnp>	{-0}	89	77	0	0.87	1	-
RiLG7	s6_9831625	15.89	<nnxnp>	{-0}	90	74	2	1.56	1	-
RiLG7	s7_13539944	16.311	<nnxnp>	{-0}	90	71	5	2.24	1	-
RiLG7	s7_13533028	17.137	<nnxnp>	{-0}	89	72	5	1.8	1	-
RiLG7	s7_14076214	18.25	<nnxnp>	{-0}	89	77	0	0.87	1	-
RiLG7	s7_14109649	18.252	<nnxnp>	{-0}	89	76	1	1.02	1	-
RiLG7	s7_14221099	18.873	<nnxnp>	{-0}	90	76	0	1.18	1	-
RiLG7	s7_14208952	18.876	<nnxnp>	{-1}	76	89	1	1.02	1	-
RiLG7	s7_14554867	22.68	<nnxnp>	{-0}	92	74	0	1.95	1	-
RiLG7	s7_14953318	27.222	<nnxnp>	{-0}	90	67	9	3.37	1	*
RiLG7	s7_15048268	27.83	<nnxnp>	{-0}	90	76	0	1.18	1	-
RiLG7	s7_15048234	28.133	<nnxnp>	{-0}	90	74	2	1.56	1	-
RiLG7	s7_15099071	28.455	<nnxnp>	{-0}	89	77	0	0.87	1	-
RiLG7	s7_15137424	28.964	<nnxnp>	{-1}	78	88	0	0.6	1	-
RiLG7	s7_15308378	32.182	<nnxnp>	{-0}	87	79	0	0.39	1	-
RiLG7	s7_15625838	32.182	<nnxnp>	{-1}	79	87	0	0.39	1	-
RiLG7	s7_15364396	32.242	<nnxnp>	{-1}	79	83	4	0.1	1	-
RiLG7	s7_15432532	33.061	<nnxnp>	{-0}	88	72	6	1.6	1	-
RiLG7	s7_15624579	33.468	<nnxnp>	{-1}	79	87	0	0.39	1	-
RiLG7	s7_15767469	34.501	<nnxnp>	{-0}	85	78	3	0.3	1	-
RiLG7	s7_15713057	34.713	<nnxnp>	{-0}	85	81	0	0.1	1	-
RiLG7	s7_16276894	37.116	<nnxnp>	{-0}	87	78	1	0.49	1	-
RiLG7	s7_16131360	37.19	<nnxnp>	{-0}	87	79	0	0.39	1	-
RiLG7	s7_16254312	37.19	<nnxnp>	{-1}	79	87	0	0.39	1	-
RiLG7	s5_2381197	37.202	<nnxnp>	{-0}	87	77	2	0.61	1	-
RiLG7	s7_16264107	37.205	<nnxnp>	{-1}	79	85	2	0.22	1	-
RiLG7	s7_16318952	37.236	<nnxnp>	{-1}	79	86	1	0.3	1	-
RiLG7	s7_16272663	37.299	<nnxnp>	{-0}	87	77	2	0.61	1	-
RiLG7	s7_16275899	37.325	<nnxnp>	{-0}	87	78	1	0.49	1	-
RiLG7	s7_15914396	37.472	<nnxnp>	{-0}	87	70	9	1.84	1	-
RiLG7	s7_15843057	37.521	<nnxnp>	{-1}	78	86	2	0.39	1	-
RiLG7	s7_16274058	37.839	<nnxnp>	{-0}	89	77	0	0.87	1	-
RiLG7	s7_16273930	38.548	<nnxnp>	{-0}	89	77	0	0.87	1	-
RiLG7	s7_16815320	40.959	<nnxnp>	{-0}	91	73	2	1.98	1	-
RiLG7	s7_17145428	42.897	<nnxnp>	{-0}	92	71	3	2.71	1	-
RiLG7	s7_17143989	43.431	<nnxnp>	{-0}	91	75	0	1.54	1	-
RiLG7	s7_17277966	44.069	<nnxnp>	{-0}	90	76	0	1.18	1	-
RiLG7	s7_17372632	44.273	<nnxnp>	{-0}	90	72	4	2	1	-
RiLG7	s7_17631375	45.34	<nnxnp>	{-0}	90	76	0	1.18	1	-
RiLG7	s7_17829766	46.518	<nnxnp>	{-0}	86	71	9	1.43	1	-
RiLG7	PMS-2	48.343	<nnxnp>	{-0}	91	75	0	1.54	1	-
RiLG7	s7_18116457	48.396	<nnxnp>	{-0}	91	73	2	1.98	1	-
RiLG7	s7_19356762	51.483	<nnxnp>	{-0}	88	76	2	0.88	1	-
RiLG7	s7_19429022	51.961	<nnxnp>	{-0}	89	77	0	0.87	1	-
RiLG7	s7_19308513	51.982	<nnxnp>	{-0}	87	72	7	1.42	1	-
RiLG7	s7_19457253	52.782	<nnxnp>	{-0}	89	72	5	1.8	1	-
RiLG7	s7_22310655	59.01	<nnxnp>	{-1}	77	85	4	0.4	1	-
RiLG7	s7_21707414	59.066	<nnxnp>	{-0}	87	74	5	1.05	1	-
RiLG7	s7_22212793	59.175	<nnxnp>	{-1}	77	83	6	0.22	1	-
RiLG7	s7_22367087	59.396	<nnxnp>	{-1}	77	89	0	0.87	1	-
RiLG8	s8_983025	0	<nnxnp>	{-0}	81	81	4	0	1	-
RiLG8	s8_318973	0.005	<nnxnp>	{-0}	81	83	2	0.02	1	-
RiLG8	s8_556435	0.006	<nnxnp>	{-0}	82	82	2	0	1	-
RiLG8	s8_151562	0.06	<nnxnp>	{-0}	82	84	0	0.02	1	-
RiLG8	s8_1582930	2.903	<nnxnp>	{-0}	81	82	3	0.01	1	-
RiLG8	s8_1523785	3.13	<nnxnp>	{-0}	81	85	0	0.1	1	-
RiLG8	s8_1910818	4.33	<nnxnp>	{-0}	79	80	7	0.01	1	-
RiLG8	s8_1773373	5.012	<nnxnp>	{-0}	78	87	1	0.49	1	-
RiLG8	s8_1801529	5.028	<nnxnp>	{-0}	78	88	0	0.6	1	-
RiLG8	s8_3234397	6.028	<nnxnp>	{-0}	76	87	3	0.74	1	-
RiLG8	s8_3097985	6.057	<nnxnp>	{-0}	76	90	0	1.18	1	-
RiLG8	s8_12146828	11.547	<nnxnp>	{-0}	75	91	0	1.54	1	-
RiLG8	s8_17113418	21.67	<nnxnp>	{-0}	76	81	9	0.16	1	-
RiLG8	s8_16622842	21.787	<nnxnp>	{-0}	80	79	7	0.01	1	-
RiLG8	s8_16987059	21.989	<nnxnp>	{-0}	78	75	13	0.06	1	-
RiLG8	s8_16769797	22.555	<nnxnp>	{-0}	79	87	0	0.39	1	-
RiLG8	s8_17060530	23.084	<nnxnp>	{-0}	80	83	3	0.06	1	-
RiLG8	s8_17102823	23.149	<nnxnp>	{-0}	80	86	0	0.22	1	-
RiLG8	s8_17363364	24.292	<nnxnp>	{-0}	80	84	2	0.1	1	-
RiLG8	s8_17363310	24.499	<nnxnp>	{-0}	80	83	3	0.06	1	-
RiLG8	s8_17404683	25.049	<nnxnp>	{-0}	79	87	0	0.39	1	-
RiLG8	s8_17565315	25.553	<nnxnp>	{-0}	80	83	3	0.06	1	-
RiLG8	s8_17694886	26.302	<nnxnp>	{-0}	79	86	1	0.3	1	-
RiLG8	s8_17565419	26.338	<nnxnp>	{-0}	79	78	9	0.01	1	-
RiLG8	s4_29737719	26.342	<nnxnp>	{-0}	78	73	15	0.17	1	-
RiLG8	s8_17862339	34.485	<nnxnp>	{-0}	80	86	0	0.22	1	-
RiLG8	s8_18349979	36.463	<nnxnp>	{-0}	77	89	0	0.87	1	-
RiLG8	s8_18315834	36.532	<nnxnp>	{-0}	77	87	2	0.61	1	-
RiLG8	s8_18733221	41.591	<nnxnp>	{-0}	73	93	0	2.41	1	-
RiLG8	s8_18765081	41.621	<nnxnp>	{-0}	73	91	2	1.98	1	-
RiLG8	s8_18990269	41.972	<nnxnp>	{-0}	72	88	6	1.6	1	-
RiLG8	s8_19050830	42.161	<nnxnp>	{-0}	72	94	0	2.92	1	*
RiLG8	s8_19280793	42.241	<nnxnp>	{-0}	72	90	4	2	1	-
RiLG8	s8_19079250	45.599	<nnxnp>	{-0}	77	82	7	0.16	1	-
RiLG8	s8_20608737	53.999	<nnxnp>	{-0}	77	78	11	0.01	1	-
RiLG8	s8_20262045	54.343	<nnxnp>	{-1}	86	80	0	0.22	1	-
RiLG8	s8_20620739	54.418	<nnxnp>	{-0}	80	84	2	0.1	1	-

## Sheet: Consensus
S4 Table. Markers mapped in 'Rainier', 'Rivedel' and consensus maps, including the linkage group and map position to which they were located.
LG	Marker	Position (cM)	Segregation	Phase	hh	hk	kk	ll	lm	nn	np	--	X2	Df	Signif.
LG1	s1_493072	0	<lmxll>	{1-}	0	0	0	81	76	0	0	9	0.16	1	-
LG1	s1_512037	0.036	<lmxll>	{0-}	0	0	0	84	81	0	0	1	0.05	1	-
LG1	s1_336583	0.679	<lmxll>	{1-}	0	0	0	83	80	0	0	3	0.06	1	-
LG1	s1_336438	0.685	<lmxll>	{1-}	0	0	0	83	83	0	0	0	0	1	-
LG1	s1_376328	0.685	<lmxll>	{0-}	0	0	0	83	83	0	0	0	0	1	-
LG1	s1_404221	2.028	<hkxhk>	{00}	27	90	49	0	0	0	0	0	7.01	2	**
LG1	s1_690093	3.206	<lmxll>	{0-}	0	0	0	83	83	0	0	0	0	1	-
LG1	s1_590653	3.206	<lmxll>	{1-}	0	0	0	83	83	0	0	0	0	1	-
LG1	s1_640847	3.236	<lmxll>	{0-}	0	0	0	83	80	0	0	3	0.06	1	-
LG1	s1_1429658	6.64	<hkxhk>	{10}	38	71	57	0	0	0	0	0	7.82	2	**
LG1	s1_1208633	7.147	<hkxhk>	{00}	28	90	48	0	0	0	0	0	6	2	**
LG1	s1_1081015	7.832	<hkxhk>	{00}	27	92	47	0	0	0	0	0	6.77	2	**
LG1	s1_1190186	8.17	<hkxhk>	{00}	26	94	46	0	0	0	0	0	7.73	2	**
LG1	s1_1238635	8.17	<hkxhk>	{11}	46	94	26	0	0	0	0	0	7.73	2	**
LG1	s1_1208585	8.445	<hkxhk>	{00}	27	92	47	0	0	0	0	0	6.77	2	**
LG1	s1_1270204	8.734	<hkxhk>	{11}	46	92	28	0	0	0	0	0	5.86	2	*
LG1	s1_1194230	9.521	<hkxhk>	{00}	28	90	48	0	0	0	0	0	6	2	**
LG1	s1_1761660	10.493	<nnxnp>	{-0}	0	0	0	0	0	68	89	9	2.81	1	*
LG1	s1_3284707	14.622	<nnxnp>	{-0}	0	0	0	0	0	74	78	14	0.11	1	-
LG1	s1_3443665	15.317	<nnxnp>	{-0}	0	0	0	0	0	73	83	10	0.64	1	-
LG1	s1_4029063	17.199	<nnxnp>	{-0}	0	0	0	0	0	74	77	15	0.06	1	-
LG1	s1_6885090	17.435	<lmxll>	{1-}	0	0	0	92	72	0	0	2	2.44	1	-
LG1	s1_6276714	17.44	<lmxll>	{1-}	0	0	0	91	70	0	0	5	2.74	1	*
LG1	s1_6276615	17.445	<lmxll>	{1-}	0	0	0	92	74	0	0	0	1.95	1	-
LG1	s1_6502979	17.445	<lmxll>	{1-}	0	0	0	92	72	0	0	2	2.44	1	-
LG1	s1_5832765	17.557	<lmxll>	{1-}	0	0	0	93	72	0	0	1	2.67	1	-
LG1	s1_3637714	17.665	<nnxnp>	{-0}	0	0	0	0	0	75	91	0	1.54	1	-
LG1	s1_7115950	21.643	<hkxhk>	{01}	50	72	44	0	0	0	0	0	3.35	2	-
LG1	s1_8870536	26.498	<hkxhk>	{01}	42	75	49	0	0	0	0	0	2.13	2	-
LG1	s1_8760055	27.24	<hkxhk>	{01}	41	77	48	0	0	0	0	0	1.46	2	-
LG1	s1_8782297	27.485	<hkxhk>	{01}	39	79	48	0	0	0	0	0	1.36	2	-
LG1	UDAp-415	28.54	<nnxnp>	{-1}	0	0	0	0	0	40	42	84	0.05	1	-
LG1	s1_7819825	29.044	<nnxnp>	{-0}	0	0	0	0	0	75	76	15	0.01	1	-
LG1	s1_7990494	29.304	<hkxhk>	{10}	48	73	45	0	0	0	0	0	2.52	2	-
LG1	s1_7844249	29.752	<hkxhk>	{01}	40	80	46	0	0	0	0	0	0.65	2	-
LG1	s1_7758487	30.083	<hkxhk>	{01}	42	78	46	0	0	0	0	0	0.8	2	-
LG1	s1_7564699	30.234	<nnxnp>	{-0}	0	0	0	0	0	77	87	2	0.61	1	-
LG1	s1_7570604	30.252	<nnxnp>	{-0}	0	0	0	0	0	77	88	1	0.73	1	-
LG1	s1_7647620	30.289	<nnxnp>	{-0}	0	0	0	0	0	77	88	1	0.73	1	-
LG1	s1_7516783	30.291	<nnxnp>	{-0}	0	0	0	0	0	77	89	0	0.87	1	-
LG1	s1_7964970	30.606	<nnxnp>	{-0}	0	0	0	0	0	75	81	10	0.23	1	-
LG1	s1_9622900	35.681	<hkxhk>	{10}	46	80	40	0	0	0	0	0	0.65	2	-
LG1	s1_11684599	36.442	<hkxhk>	{00}	38	68	55	0	0	0	0	5	7.47	2	**
LG1	s1_11300197	41.6	<hkxhk>	{11}	47	78	39	0	0	0	0	2	1.17	2	-
LG1	s1_10642022	42.337	<nnxnp>	{-0}	0	0	0	0	0	80	79	7	0.01	1	-
LG1	s1_10659420	42.381	<nnxnp>	{-0}	0	0	0	0	0	80	83	3	0.06	1	-
LG1	s1_10866255	42.878	<nnxnp>	{-1}	0	0	0	0	0	87	75	4	0.89	1	-
LG1	s1_10875237	42.975	<nnxnp>	{-1}	0	0	0	0	0	87	79	0	0.39	1	-
LG1	s1_11012864	44.553	<nnxnp>	{-0}	0	0	0	0	0	78	88	0	0.6	1	-
LG1	s1_12959899	45.063	<hkxhk>	{01}	44	77	45	0	0	0	0	0	0.88	2	-
LG1	s1_11226569	45.81	<nnxnp>	{-0}	0	0	0	0	0	78	85	3	0.3	1	-
LG1	s1_11237658	45.817	<nnxnp>	{-0}	0	0	0	0	0	76	85	5	0.5	1	-
LG1	s1_12257390	47.539	<hkxhk>	{11}	48	83	35	0	0	0	0	0	2.04	2	-
LG1	s1_12284952	47.817	<nnxnp>	{-0}	0	0	0	0	0	79	83	4	0.1	1	-
LG1	s1_12159049	48.034	<nnxnp>	{-0}	0	0	0	0	0	78	86	2	0.39	1	-
LG1	s1_12256939	48.548	<hkxhk>	{11}	45	89	32	0	0	0	0	0	2.9	2	-
LG1	s1_23504633	48.714	<nnxnp>	{-0}	0	0	0	0	0	77	86	3	0.5	1	-
LG1	s1_12181482	48.75	<nnxnp>	{-0}	0	0	0	0	0	77	89	0	0.87	1	-
LG1	s1_11650430	48.75	<nnxnp>	{-1}	0	0	0	0	0	89	77	0	0.87	1	-
LG1	s1_15086404	48.755	<nnxnp>	{-1}	0	0	0	0	0	89	76	1	1.02	1	-
LG1	s1_15071820	48.984	<nnxnp>	{-1}	0	0	0	0	0	89	76	1	1.02	1	-
LG1	s6_17833473	49.358	<nnxnp>	{-0}	0	0	0	0	0	78	88	0	0.6	1	-
LG1	s1_22820703	49.904	<nnxnp>	{-0}	0	0	0	0	0	77	89	0	0.87	1	-
LG1	s1_22814513	49.904	<nnxnp>	{-0}	0	0	0	0	0	77	88	1	0.73	1	-
LG1	s1_24964192	51.626	<nnxnp>	{-0}	0	0	0	0	0	80	86	0	0.22	1	-
LG1	s1_25100316	51.626	<nnxnp>	{-1}	0	0	0	0	0	86	80	0	0.22	1	-
LG1	s1_25150700	51.812	<nnxnp>	{-0}	0	0	0	0	0	80	84	2	0.1	1	-
LG1	s1_25640019	52.731	<nnxnp>	{-0}	0	0	0	0	0	82	84	0	0.02	1	-
LG1	s1_25667115	52.779	<nnxnp>	{-0}	0	0	0	0	0	82	81	3	0.01	1	-
LG1	s1_25762332	53.451	<nnxnp>	{-1}	0	0	0	0	0	85	73	8	0.91	1	-
LG1	s1_25733032	53.508	<nnxnp>	{-1}	0	0	0	0	0	85	77	4	0.4	1	-
LG1	s1_25924201	54.54	<nnxnp>	{-1}	0	0	0	0	0	85	81	0	0.1	1	-
LG1	s1_25919451	54.567	<nnxnp>	{-0}	0	0	0	0	0	81	84	1	0.05	1	-
LG1	s1_26482311	56.153	<hkxhk>	{01}	44	75	47	0	0	0	0	0	1.65	2	-
LG1	s1_26370947	56.303	<nnxnp>	{-0}	0	0	0	0	0	82	84	0	0.02	1	-
LG1	s1_26403568	56.606	<hkxhk>	{10}	53	67	46	0	0	0	0	0	6.76	2	**
LG1	s1_27012126	58.621	<hkxhk>	{10}	48	71	46	0	0	0	0	1	3.25	2	-
LG1	s1_26941003	59.869	<hkxhk>	{01}	41	77	48	0	0	0	0	0	1.46	2	-
LG1	s1_27273529	60.13	<nnxnp>	{-0}	0	0	0	0	0	83	75	8	0.41	1	-
LG1	s1_26930112	60.433	<hkxhk>	{01}	44	75	47	0	0	0	0	0	1.65	2	-
LG1	s1_27551678	63.095	<hkxhk>	{01}	41	78	47	0	0	0	0	0	1.04	2	-
LG1	s1_27555310	64.024	<hkxhk>	{01}	48	67	50	0	0	0	0	1	5.87	2	*
LG1	s1_28938918	65.08	<lmxll>	{1-}	0	0	0	85	65	0	0	16	2.67	1	-
LG1	s1_28834950	65.178	<lmxll>	{1-}	0	0	0	91	68	0	0	7	3.33	1	*
LG1	s1_28448436	65.197	<lmxll>	{1-}	0	0	0	91	69	0	0	6	3.02	1	*
LG1	s1_28785064	65.222	<lmxll>	{1-}	0	0	0	90	69	0	0	7	2.77	1	*
LG1	s1_28257606	65.368	<lmxll>	{1-}	0	0	0	91	74	0	0	1	1.75	1	-
LG1	s1_28272286	65.409	<lmxll>	{1-}	0	0	0	91	73	0	0	2	1.98	1	-
LG1	s1_27823668	65.81	<hkxhk>	{01}	42	70	54	0	0	0	0	0	5.81	2	*
LG1	s1_28218597	67.332	<hkxhk>	{10}	50	75	41	0	0	0	0	0	2.52	2	-
LG1	s1_29041384	68.43	<hkxhk>	{10}	50	75	41	0	0	0	0	0	2.52	2	-
LG1	s1_31012393	68.896	<lmxll>	{1-}	0	0	0	91	75	0	0	0	1.54	1	-
LG1	s1_30089977	70.811	<hkxhk>	{10}	48	77	41	0	0	0	0	0	1.46	2	-
LG1	s1_29890299	71.235	<nnxnp>	{-0}	0	0	0	0	0	82	80	4	0.02	1	-
LG1	s1_29550078	71.241	<nnxnp>	{-0}	0	0	0	0	0	81	73	12	0.42	1	-
LG1	s1_29670521	71.269	<nnxnp>	{-0}	0	0	0	0	0	82	81	3	0.01	1	-
LG1	s1_29548379	71.27	<nnxnp>	{-0}	0	0	0	0	0	82	81	3	0.01	1	-
LG1	s1_29363919	71.36	<nnxnp>	{-0}	0	0	0	0	0	82	84	0	0.02	1	-
LG1	s1_29771883	71.962	<nnxnp>	{-0}	0	0	0	0	0	79	75	12	0.1	1	-
LG1	s1_30077405	72.241	<hkxhk>	{01}	42	69	54	0	0	0	0	1	6.16	2	**
LG1	s1_29965530	72.421	<nnxnp>	{-0}	0	0	0	0	0	82	82	2	0	1	-
LG1	s1_29660520	72.765	<nnxnp>	{-0}	0	0	0	0	0	82	77	7	0.16	1	-
LG1	s1_30908471	73.396	<hkxhk>	{10}	49	74	43	0	0	0	0	0	2.39	2	-
LG1	s1_30031712	74.873	<hkxhk>	{01}	48	64	54	0	0	0	0	0	9.13	2	**
LG1	s1_30949986	76.332	<nnxnp>	{-0}	0	0	0	0	0	81	85	0	0.1	1	-
LG1	s1_34199333	79.531	<lmxll>	{1-}	0	0	0	89	71	0	0	6	2.02	1	-
LG1	s1_33907538	79.618	<lmxll>	{1-}	0	0	0	89	76	0	0	1	1.02	1	-
LG1	s1_31316348	80.215	<nnxnp>	{-0}	0	0	0	0	0	79	84	3	0.15	1	-
LG1	s1_31388495	80.247	<nnxnp>	{-0}	0	0	0	0	0	79	87	0	0.39	1	-
LG1	s1_23131583	81.299	<hkxhk>	{01}	50	68	48	0	0	0	0	0	5.47	2	*
LG1	s1_31605578	81.614	<nnxnp>	{-0}	0	0	0	0	0	81	85	0	0.1	1	-
LG1	s1_32050057	82.795	<nnxnp>	{-0}	0	0	0	0	0	81	85	0	0.1	1	-
LG1	s1_31650343	82.801	<nnxnp>	{-0}	0	0	0	0	0	81	83	2	0.02	1	-
LG1	s1_32211995	83.414	<nnxnp>	{-0}	0	0	0	0	0	80	86	0	0.22	1	-
LG1	s1_34689215	83.618	<lmxll>	{1-}	0	0	0	84	81	0	0	1	0.05	1	-
LG1	s1_34740216	83.63	<lmxll>	{1-}	0	0	0	85	81	0	0	0	0.1	1	-
LG1	s1_33652442	84.543	<hkxhk>	{01}	47	73	46	0	0	0	0	0	2.42	2	-
LG1	s1_32785925	84.668	<nnxnp>	{-0}	0	0	0	0	0	80	86	0	0.22	1	-
LG1	PMS-67	85.224	<nnxnp>	{-0}	0	0	0	0	0	81	85	0	0.1	1	-
LG1	s1_33350516	85.533	<nnxnp>	{-0}	0	0	0	0	0	82	81	3	0.01	1	-
LG1	s1_33047596	85.787	<nnxnp>	{-0}	0	0	0	0	0	82	84	0	0.02	1	-
LG1	s1_32831905	85.809	<nnxnp>	{-0}	0	0	0	0	0	82	82	2	0	1	-
LG1	s1_35259318	86.597	<lmxll>	{1-}	0	0	0	86	78	0	0	2	0.39	1	-
LG1	s1_35282364	86.692	<lmxll>	{1-}	0	0	0	86	78	0	0	2	0.39	1	-
LG1	s1_33640442	87.896	<nnxnp>	{-0}	0	0	0	0	0	82	80	4	0.02	1	-
LG1	s1_35501976	88.597	<lmxll>	{1-}	0	0	0	87	79	0	0	0	0.39	1	-
LG1	s1_35520953	89.171	<lmxll>	{1-}	0	0	0	86	75	0	0	5	0.75	1	-
LG1	s1_35536636	89.175	<lmxll>	{1-}	0	0	0	86	80	0	0	0	0.22	1	-
LG1	s1_35566094	90.178	<hkxhk>	{11}	43	84	39	0	0	0	0	0	0.22	2	-
LG1	s1_35552259	90.499	<hkxhk>	{00}	39	86	41	0	0	0	0	0	0.27	2	-
LG1	s1_36570421	91.179	<lmxll>	{1-}	0	0	0	83	80	0	0	3	0.06	1	-
LG1	s1_36173160	91.214	<lmxll>	{1-}	0	0	0	83	80	0	0	3	0.06	1	-
LG1	s1_35966775	91.244	<lmxll>	{1-}	0	0	0	83	81	0	0	2	0.02	1	-
LG1	s1_36092275	91.246	<lmxll>	{1-}	0	0	0	83	83	0	0	0	0	1	-
LG1	s1_36775145	91.267	<lmxll>	{1-}	0	0	0	83	82	0	0	1	0.01	1	-
LG1	s1_36598428	91.276	<lmxll>	{1-}	0	0	0	83	81	0	0	2	0.02	1	-
LG1	s1_36572605	91.338	<lmxll>	{1-}	0	0	0	82	77	0	0	7	0.16	1	-
LG1	s1_36600924	91.453	<lmxll>	{1-}	0	0	0	83	80	0	0	3	0.06	1	-
LG1	s1_35662376	91.954	<hkxhk>	{11}	46	79	41	0	0	0	0	0	0.69	2	-
LG1	s1_36495759	94.163	<nnxnp>	{-1}	0	0	0	0	0	78	87	1	0.49	1	-
LG1	s1_36520537	94.942	<hkxhk>	{00}	46	79	40	0	0	0	0	1	0.73	2	-
LG1	s1_36520522	94.942	<hkxhk>	{11}	40	79	46	0	0	0	0	1	0.73	2	-
LG1	s1_36652912	95.918	<nnxnp>	{-1}	0	0	0	0	0	78	82	6	0.1	1	-
LG1	s1_36709583	96.372	<nnxnp>	{-1}	0	0	0	0	0	79	87	0	0.39	1	-
LG1	s1_37100959	96.717	<lmxll>	{1-}	0	0	0	85	75	0	0	6	0.62	1	-
LG1	s1_36730111	96.971	<nnxnp>	{-1}	0	0	0	0	0	80	86	0	0.22	1	-
LG1	s1_37425351	99.455	<lmxll>	{1-}	0	0	0	84	81	0	0	1	0.05	1	-
LG1	s1_37278405	100.889	<hkxhk>	{01}	40	82	44	0	0	0	0	0	0.22	2	-
LG1	s1_37151061	101.49	<hkxhk>	{00}	42	81	43	0	0	0	0	0	0.11	2	-
LG1	s1_37041277	102.295	<nnxnp>	{-1}	0	0	0	0	0	81	85	0	0.1	1	-
LG1	s1_37522593	102.837	<hkxhk>	{00}	42	81	43	0	0	0	0	0	0.11	2	-
LG1	s1_37278419	103.537	<nnxnp>	{-0}	0	0	0	0	0	85	80	1	0.15	1	-
LG1	s1_37212039	103.54	<nnxnp>	{-1}	0	0	0	0	0	81	85	0	0.1	1	-
LG1	s1_38238968	104.196	<lmxll>	{1-}	0	0	0	85	81	0	0	0	0.1	1	-
LG1	s1_38148601	104.613	<lmxll>	{1-}	0	0	0	85	75	0	0	6	0.62	1	-
LG1	s1_38238599	104.806	<lmxll>	{1-}	0	0	0	86	76	0	0	4	0.62	1	-
LG1	s1_37889266	105.719	<nnxnp>	{-0}	0	0	0	0	0	83	75	8	0.41	1	-
LG1	s1_39063825	106.053	<lmxll>	{1-}	0	0	0	88	78	0	0	0	0.6	1	-
LG1	s1_39051424	108.713	<nnxnp>	{-0}	0	0	0	0	0	82	81	3	0.01	1	-
LG1	s1_39081865	108.774	<nnxnp>	{-0}	0	0	0	0	0	82	80	4	0.02	1	-
LG1	s1_38378468	108.926	<nnxnp>	{-0}	0	0	0	0	0	82	84	0	0.02	1	-
LG1	s1_38277187	109.292	<nnxnp>	{-0}	0	0	0	0	0	82	77	7	0.16	1	-
LG1	s1_38369307	109.57	<nnxnp>	{-0}	0	0	0	0	0	83	82	1	0.01	1	-
LG1	s1_38302378	109.805	<nnxnp>	{-0}	0	0	0	0	0	83	71	12	0.94	1	-
LG1	s1_40623243	110.421	<lmxll>	{1-}	0	0	0	91	74	0	0	1	1.75	1	-
LG1	s1_40714828	111.729	<lmxll>	{1-}	0	0	0	89	77	0	0	0	0.87	1	-
LG1	s1_37822120	111.884	<hkxhk>	{10}	51	63	48	0	0	0	0	4	8.11	2	**
LG1	s1_39282772	113.447	<nnxnp>	{-1}	0	0	0	0	0	81	82	3	0.01	1	-
LG1	s1_39521216	114.465	<nnxnp>	{-1}	0	0	0	0	0	79	87	0	0.39	1	-
LG1	s1_39728842	117.03	<nnxnp>	{-0}	0	0	0	0	0	87	79	0	0.39	1	-
LG1	s1_39744944	117.17	<nnxnp>	{-0}	0	0	0	0	0	87	73	6	1.23	1	-
LG1	s1_39792608	117.599	<nnxnp>	{-1}	0	0	0	0	0	80	86	0	0.22	1	-
LG1	s1_40392121	118.203	<nnxnp>	{-1}	0	0	0	0	0	79	87	0	0.39	1	-
LG1	s1_40220931	118.203	<nnxnp>	{-0}	0	0	0	0	0	87	79	0	0.39	1	-
LG1	s1_39760956	118.24	<nnxnp>	{-1}	0	0	0	0	0	79	84	3	0.15	1	-
LG1	s1_39786051	118.485	<nnxnp>	{-1}	0	0	0	0	0	78	76	12	0.03	1	-
LG1	s1_44124719	119.436	<lmxll>	{1-}	0	0	0	87	79	0	0	0	0.39	1	-
LG1	s1_42980659	122.325	<lmxll>	{1-}	0	0	0	82	73	0	0	11	0.52	1	-
LG1	s1_43149931	123.054	<lmxll>	{0-}	0	0	0	83	75	0	0	8	0.41	1	-
LG1	s1_43475799	123.617	<lmxll>	{0-}	0	0	0	84	81	0	0	1	0.05	1	-
LG1	s1_43102782	123.622	<lmxll>	{0-}	0	0	0	84	80	0	0	2	0.1	1	-
LG1	s1_43084529	123.632	<lmxll>	{0-}	0	0	0	84	79	0	0	3	0.15	1	-
LG1	s1_43114928	123.632	<lmxll>	{0-}	0	0	0	84	79	0	0	3	0.15	1	-
LG1	s1_43150715	123.643	<lmxll>	{0-}	0	0	0	84	81	0	0	1	0.05	1	-
LG1	s1_43102725	123.643	<lmxll>	{0-}	0	0	0	83	80	0	0	3	0.06	1	-
LG1	s1_43062476	123.65	<lmxll>	{1-}	0	0	0	82	84	0	0	0	0.02	1	-
LG1	s1_43701037	123.65	<lmxll>	{0-}	0	0	0	84	82	0	0	0	0.02	1	-
LG1	s1_43475775	123.659	<lmxll>	{1-}	0	0	0	82	83	0	0	1	0.01	1	-
LG1	s1_43221581	123.662	<lmxll>	{0-}	0	0	0	83	81	0	0	2	0.02	1	-
LG1	s1_43084621	123.662	<lmxll>	{0-}	0	0	0	84	80	0	0	2	0.1	1	-
LG1	s1_43139665	123.68	<lmxll>	{0-}	0	0	0	83	81	0	0	2	0.02	1	-
LG1	s1_42924871	124.311	<lmxll>	{0-}	0	0	0	83	82	0	0	1	0.01	1	-
LG1	s4_3011114	124.314	<lmxll>	{0-}	0	0	0	83	83	0	0	0	0	1	-
LG1	s1_43016879	124.324	<lmxll>	{1-}	0	0	0	83	82	0	0	1	0.01	1	-
LG1	s1_42801165	124.334	<lmxll>	{0-}	0	0	0	83	81	0	0	2	0.02	1	-
LG1	s1_41244985	124.338	<nnxnp>	{-1}	0	0	0	0	0	79	87	0	0.39	1	-
LG1	s1_42186915	124.93	<lmxll>	{0-}	0	0	0	82	84	0	0	0	0.02	1	-
LG1	s1_42186718	124.944	<lmxll>	{0-}	0	0	0	82	83	0	0	1	0.01	1	-
LG1	s1_42153859	124.969	<lmxll>	{0-}	0	0	0	81	79	0	0	6	0.02	1	-
LG1	s1_42397607	124.971	<lmxll>	{0-}	0	0	0	82	80	0	0	4	0.02	1	-
LG1	s1_41264204	125.79	<nnxnp>	{-1}	0	0	0	0	0	80	85	1	0.15	1	-
LG1	s1_46765766	130.473	<nnxnp>	{-0}	0	0	0	0	0	85	81	0	0.1	1	-
LG1	s1_44354389	132.87	<hkxhk>	{10}	44	88	34	0	0	0	0	0	1.81	2	-
LG1	s1_44403793	136.471	<nnxnp>	{-0}	0	0	0	0	0	80	75	11	0.16	1	-
LG1	s1_43909967	136.72	<nnxnp>	{-0}	0	0	0	0	0	87	79	0	0.39	1	-
LG1	s1_43710227	136.72	<nnxnp>	{-1}	0	0	0	0	0	79	87	0	0.39	1	-
LG1	s1_44499877	136.721	<nnxnp>	{-1}	0	0	0	0	0	78	74	14	0.11	1	-
LG1	s1_43809646	136.844	<nnxnp>	{-1}	0	0	0	0	0	79	86	1	0.3	1	-
LG1	s1_44686492	137.591	<nnxnp>	{-0}	0	0	0	0	0	84	68	14	1.68	1	-
LG1	s1_44451902	137.666	<nnxnp>	{-1}	0	0	0	0	0	80	86	0	0.22	1	-
LG1	s1_44764873	138.322	<nnxnp>	{-0}	0	0	0	0	0	84	82	0	0.02	1	-
LG1	s1_45456733	138.322	<nnxnp>	{-1}	0	0	0	0	0	82	84	0	0.02	1	-
LG1	s1_44661638	138.411	<nnxnp>	{-1}	0	0	0	0	0	82	81	3	0.01	1	-
LG2	s2_4250326	0	<hkxhk>	{10}	41	92	26	0	0	0	0	7	6.76	2	**
LG2	s2_9861152	4.035	<lmxll>	{0-}	0	0	0	76	88	0	0	2	0.88	1	-
LG2	s2_10258716	4.072	<lmxll>	{0-}	0	0	0	76	89	0	0	1	1.02	1	-
LG2	s2_10147949	4.108	<lmxll>	{1-}	0	0	0	90	76	0	0	0	1.18	1	-
LG2	s2_9691706	4.485	<lmxll>	{0-}	0	0	0	76	85	0	0	5	0.5	1	-
LG2	s2_1654821	5.257	<hkxhk>	{11}	49	76	40	0	0	0	0	1	2.01	2	-
LG2	s2_706131	10.263	<lmxll>	{0-}	0	0	0	70	96	0	0	0	4.07	1	**
LG2	s2_705067	10.863	<lmxll>	{0-}	0	0	0	70	90	0	0	6	2.5	1	-
LG2	s2_1745155	12.816	<hkxhk>	{00}	36	89	41	0	0	0	0	0	1.17	2	-
LG2	s2_4912153	16.748	<lmxll>	{0-}	0	0	0	75	86	0	0	5	0.75	1	-
LG2	s2_3851317	16.856	<lmxll>	{1-}	0	0	0	91	74	0	0	1	1.75	1	-
LG2	s2_3867998	16.977	<lmxll>	{1-}	0	0	0	91	75	0	0	0	1.54	1	-
LG2	s2_9707702	17.025	<nnxnp>	{-1}	0	0	0	0	0	74	85	7	0.76	1	-
LG2	s8_4538115	17.169	<nnxnp>	{-0}	0	0	0	0	0	92	73	1	2.19	1	-
LG2	s2_10223139	17.188	<nnxnp>	{-0}	0	0	0	0	0	92	74	0	1.95	1	-
LG2	s2_3987595	17.682	<lmxll>	{0-}	0	0	0	76	85	0	0	5	0.5	1	-
LG2	s2_3815121	18.328	<hkxhk>	{00}	34	95	37	0	0	0	0	0	3.58	2	-
LG2	s2_8997963	19.069	<nnxnp>	{-0}	0	0	0	0	0	91	69	6	3.02	1	*
LG2	s2_664619	20.016	<nnxnp>	{-0}	0	0	0	0	0	91	75	0	1.54	1	-
LG2	s2_4907835	20.586	<hkxhk>	{01}	45	67	54	0	0	0	0	0	7.14	2	**
LG2	s2_6071765	20.801	<lmxll>	{0-}	0	0	0	79	85	0	0	2	0.22	1	-
LG2	s2_2301347	21.287	<nnxnp>	{-1}	0	0	0	0	0	77	89	0	0.87	1	-
LG2	s2_5018966	21.877	<hkxhk>	{01}	44	66	56	0	0	0	0	0	8.7	2	**
LG2	s2_2427028	22.617	<nnxnp>	{-1}	0	0	0	0	0	77	89	0	0.87	1	-
LG2	s2_11564418	23.262	<lmxll>	{0-}	0	0	0	78	85	0	0	3	0.3	1	-
LG2	s2_11354990	23.855	<lmxll>	{0-}	0	0	0	78	86	0	0	2	0.39	1	-
LG2	s2_2975134	24.123	<nnxnp>	{-1}	0	0	0	0	0	78	88	0	0.6	1	-
LG2	s2_3822727	24.123	<nnxnp>	{-0}	0	0	0	0	0	88	78	0	0.6	1	-
LG2	s2_12809720	24.332	<lmxll>	{0-}	0	0	0	77	83	0	0	6	0.22	1	-
LG2	s2_12441799	24.498	<lmxll>	{0-}	0	0	0	77	89	0	0	0	0.87	1	-
LG2	s2_12447854	25.074	<lmxll>	{0-}	0	0	0	76	89	0	0	1	1.02	1	-
LG2	s2_13414676	25.096	<lmxll>	{0-}	0	0	0	76	90	0	0	0	1.18	1	-
LG2	s2_13416116	25.874	<lmxll>	{0-}	0	0	0	75	89	0	0	2	1.2	1	-
LG2	s2_14256335	31.64	<lmxll>	{0-}	0	0	0	75	91	0	0	0	1.54	1	-
LG2	s2_15791060	32.607	<hkxhk>	{10}	53	80	33	0	0	0	0	0	5.04	2	*
LG2	s2_14471925	32.893	<lmxll>	{0-}	0	0	0	73	93	0	0	0	2.41	1	-
LG2	s2_15089812	33.34	<lmxll>	{0-}	0	0	0	74	91	0	0	1	1.75	1	-
LG2	s2_16107492	33.456	<hkxhk>	{01}	32	83	51	0	0	0	0	0	4.35	2	-
LG2	s2_16083911	34.141	<hkxhk>	{10}	53	80	33	0	0	0	0	0	5.04	2	*
LG2	s2_15356547	34.643	<lmxll>	{0-}	0	0	0	74	90	0	0	2	1.56	1	-
LG2	s2_15640184	35.73	<lmxll>	{0-}	0	0	0	72	93	0	0	1	2.67	1	-
LG2	s2_15691801	35.813	<lmxll>	{0-}	0	0	0	72	94	0	0	0	2.92	1	*
LG2	s2_16521836	36.348	<nnxnp>	{-1}	0	0	0	0	0	75	91	0	1.54	1	-
LG2	s2_15693693	36.37	<lmxll>	{0-}	0	0	0	71	95	0	0	0	3.47	1	*
LG2	s2_16175781	36.818	<lmxll>	{0-}	0	0	0	72	92	0	0	2	2.44	1	-
LG2	s2_16700339	38.481	<lmxll>	{0-}	0	0	0	71	92	0	0	3	2.71	1	-
LG2	s2_17136218	38.669	<lmxll>	{0-}	0	0	0	71	93	0	0	2	2.95	1	*
LG2	s2_17122248	38.727	<lmxll>	{0-}	0	0	0	70	80	0	0	16	0.67	1	-
LG2	s2_17105740	38.798	<lmxll>	{0-}	0	0	0	71	95	0	0	0	3.47	1	*
LG2	s2_16755779	38.805	<lmxll>	{0-}	0	0	0	71	94	0	0	1	3.21	1	*
LG2	s2_16900286	38.825	<lmxll>	{0-}	0	0	0	70	92	0	0	4	2.99	1	*
LG2	s2_17172344	38.838	<lmxll>	{0-}	0	0	0	71	90	0	0	5	2.24	1	-
LG2	s2_19199325	41.107	<nnxnp>	{-1}	0	0	0	0	0	81	83	2	0.02	1	-
LG2	s2_19047545	41.673	<nnxnp>	{-1}	0	0	0	0	0	80	85	1	0.15	1	-
LG2	s2_19332473	42.865	<nnxnp>	{-1}	0	0	0	0	0	80	86	0	0.22	1	-
LG2	s2_19591193	43.403	<nnxnp>	{-1}	0	0	0	0	0	81	84	1	0.05	1	-
LG2	s2_20290583	46.276	<nnxnp>	{-1}	0	0	0	0	0	82	84	0	0.02	1	-
LG2	s2_19869360	46.611	<lmxll>	{0-}	0	0	0	65	93	0	0	8	4.96	1	**
LG2	s2_20417080	46.834	<nnxnp>	{-1}	0	0	0	0	0	83	83	0	0	1	-
LG2	s2_20266618	46.994	<nnxnp>	{-1}	0	0	0	0	0	81	69	16	0.96	1	-
LG2	s2_19889819	47.14	<hkxhk>	{10}	52	83	31	0	0	0	0	0	5.31	2	*
LG2	s2_20486124	48.073	<nnxnp>	{-1}	0	0	0	0	0	83	81	2	0.02	1	-
LG2	s2_20162201	48.656	<hkxhk>	{01}	32	81	53	0	0	0	0	0	5.41	2	*
LG2	s2_20210002	50.094	<hkxhk>	{01}	35	76	55	0	0	0	0	0	6	2	**
LG2	s2_20921620	51.514	<nnxnp>	{-1}	0	0	0	0	0	83	83	0	0	1	-
LG2	s2_21483227	54.749	<hkxhk>	{00}	31	87	48	0	0	0	0	0	3.87	2	-
LG2	UCD-CH11	55.874	<nnxnp>	{-1}	0	0	0	0	0	80	86	0	0.22	1	-
LG2	s2_21629421	57.291	<lmxll>	{0-}	0	0	0	65	92	0	0	9	4.64	1	**
LG2	s2_21695836	58.822	<lmxll>	{0-}	0	0	0	67	99	0	0	0	6.17	1	**
LG2	s2_21662414	59.057	<lmxll>	{0-}	0	0	0	67	92	0	0	7	3.93	1	**
LG2	s2_22345474	60.13	<nnxnp>	{-0}	0	0	0	0	0	84	74	8	0.63	1	-
LG2	s2_21900771	60.133	<nnxnp>	{-0}	0	0	0	0	0	85	73	8	0.91	1	-
LG2	s2_22860625	60.828	<hkxhk>	{00}	34	79	52	0	0	0	0	1	4.22	2	-
LG2	s2_22947360	61.632	<hkxhk>	{01}	41	70	54	0	0	0	0	1	5.84	2	*
LG2	s2_22505538	62.562	<nnxnp>	{-0}	0	0	0	0	0	81	75	10	0.23	1	-
LG2	s2_22505376	62.8	<nnxnp>	{-0}	0	0	0	0	0	81	84	1	0.05	1	-
LG2	s2_22765536	63.54	<hkxhk>	{11}	47	86	33	0	0	0	0	0	2.58	2	-
LG2	UCD-CH12	63.834	<nnxnp>	{-1}	0	0	0	0	0	87	79	0	0.39	1	-
LG2	s2_23202653	64.333	<hkxhk>	{01}	41	70	53	0	0	0	0	2	5.27	2	*
LG2	s2_23061020	65.119	<nnxnp>	{-0}	0	0	0	0	0	81	85	0	0.1	1	-
LG2	s2_23065474	65.125	<nnxnp>	{-0}	0	0	0	0	0	81	84	1	0.05	1	-
LG2	s2_23099671	65.696	<hkxhk>	{10}	51	78	37	0	0	0	0	0	2.96	2	-
LG2	s2_23099755	65.975	<hkxhk>	{01}	38	78	50	0	0	0	0	0	2.34	2	-
LG2	s2_22784889	66.127	<lmxll>	{0-}	0	0	0	66	94	0	0	6	4.9	1	**
LG2	s2_23334906	66.465	<lmxll>	{1-}	0	0	0	99	66	0	0	1	6.6	1	**
LG2	s2_23272082	66.562	<lmxll>	{1-}	0	0	0	99	67	0	0	0	6.17	1	**
LG2	s2_23677811	67.76	<lmxll>	{1-}	0	0	0	97	69	0	0	0	4.72	1	**
LG2	s2_23431770	68.168	<nnxnp>	{-0}	0	0	0	0	0	80	86	0	0.22	1	-
LG2	s2_23443456	68.562	<nnxnp>	{-0}	0	0	0	0	0	79	80	7	0.01	1	-
LG2	s2_24010650	68.783	<hkxhk>	{01}	42	77	47	0	0	0	0	0	1.17	2	-
LG2	s2_24091341	69.402	<nnxnp>	{-0}	0	0	0	0	0	78	88	0	0.6	1	-
LG2	s2_24153000	69.968	<nnxnp>	{-0}	0	0	0	0	0	79	87	0	0.39	1	-
LG2	s1_8514165	69.968	<nnxnp>	{-1}	0	0	0	0	0	87	79	0	0.39	1	-
LG2	s2_15547711	69.98	<nnxnp>	{-0}	0	0	0	0	0	78	83	5	0.16	1	-
LG2	s2_24196836	70.096	<nnxnp>	{-0}	0	0	0	0	0	79	86	1	0.3	1	-
LG2	s2_24031927	70.138	<hkxhk>	{01}	44	75	47	0	0	0	0	0	1.65	2	-
LG2	s2_24576208	70.39	<lmxll>	{0-}	0	0	0	71	95	0	0	0	3.47	1	*
LG2	s2_24031822	70.739	<hkxhk>	{10}	49	76	41	0	0	0	0	0	1.95	2	-
LG2	s2_24987649	72.367	<lmxll>	{0-}	0	0	0	70	96	0	0	0	4.07	1	**
LG2	s2_25371101	72.941	<lmxll>	{1-}	0	0	0	95	70	0	0	1	3.79	1	*
LG2	s2_25244162	72.957	<lmxll>	{0-}	0	0	0	71	95	0	0	0	3.47	1	*
LG2	s2_25523698	72.958	<lmxll>	{0-}	0	0	0	71	90	0	0	5	2.24	1	-
LG2	UDP98-410	73.27	<lmxll>	{1-}	0	0	0	94	72	0	0	0	2.92	1	*
LG2	PceGA-34	73.27	<lmxll>	{0-}	0	0	0	72	94	0	0	0	2.92	1	*
LG2	s2_24581082	73.764	<nnxnp>	{-1}	0	0	0	0	0	86	73	7	1.06	1	-
LG2	s2_25553931	73.815	<lmxll>	{0-}	0	0	0	73	93	0	0	0	2.41	1	-
LG2	s2_25623458	74.326	<lmxll>	{0-}	0	0	0	73	87	0	0	6	1.23	1	-
LG2	s2_25780503	74.466	<lmxll>	{0-}	0	0	0	74	87	0	0	5	1.05	1	-
LG2	s2_24711542	74.905	<nnxnp>	{-0}	0	0	0	0	0	81	85	0	0.1	1	-
LG2	s2_25362470	75.314	<hkxhk>	{00}	36	81	49	0	0	0	0	0	2.13	2	-
LG2	s2_26572434	75.57	<lmxll>	{0-}	0	0	0	75	83	0	0	8	0.41	1	-
LG2	s2_26293818	75.59	<lmxll>	{0-}	0	0	0	75	91	0	0	0	1.54	1	-
LG2	s2_26288441	75.73	<lmxll>	{0-}	0	0	0	75	85	0	0	6	0.62	1	-
LG2	s2_25114258	76.119	<nnxnp>	{-0}	0	0	0	0	0	83	83	0	0	1	-
LG2	UCD-CH21	76.706	<nnxnp>	{-0}	0	0	0	0	0	82	84	0	0.02	1	-
LG2	s2_25390769	76.711	<nnxnp>	{-1}	0	0	0	0	0	82	67	17	1.51	1	-
LG2	s2_25755225	76.732	<nnxnp>	{-1}	0	0	0	0	0	84	81	1	0.05	1	-
LG2	s2_25766562	76.904	<hkxhk>	{01}	39	78	49	0	0	0	0	0	1.81	2	-
LG2	s2_2251791	78.216	<hkxhk>	{10}	49	75	42	0	0	0	0	0	2.13	2	-
LG2	s2_26344024	78.652	<hkxhk>	{00}	35	88	43	0	0	0	0	0	1.37	2	-
LG2	s2_26013776	79.993	<hkxhk>	{10}	48	75	42	0	0	0	0	1	1.8	2	-
LG2	s2_26552025	80.677	<hkxhk>	{00}	39	79	48	0	0	0	0	0	1.36	2	-
LG2	s2_26001307	81.328	<hkxhk>	{10}	50	73	43	0	0	0	0	0	3	2	-
LG2	s2_26269439	83.027	<hkxhk>	{00}	37	77	49	0	0	0	0	3	2.26	2	-
LG2	s2_26687741	86.453	<hkxhk>	{11}	41	73	49	0	0	0	0	3	2.56	2	-
LG3	s3_441027	0	<hkxhk>	{11}	36	82	48	0	0	0	0	0	1.76	2	-
LG3	s3_419556	2.131	<hkxhk>	{11}	35	84	47	0	0	0	0	0	1.76	2	-
LG3	s3_440979	4.271	<lmxll>	{1-}	0	0	0	79	82	0	0	5	0.06	1	-
LG3	s3_615587	4.274	<lmxll>	{1-}	0	0	0	79	86	0	0	1	0.3	1	-
LG3	s3_357550	4.282	<lmxll>	{1-}	0	0	0	79	87	0	0	0	0.39	1	-
LG3	s3_1262637	4.639	<lmxll>	{1-}	0	0	0	81	82	0	0	3	0.01	1	-
LG3	s3_832042	4.64	<lmxll>	{1-}	0	0	0	81	85	0	0	0	0.1	1	-
LG3	s3_1934809	4.855	<lmxll>	{1-}	0	0	0	79	76	0	0	11	0.06	1	-
LG3	s3_1721292	4.886	<lmxll>	{1-}	0	0	0	80	81	0	0	5	0.01	1	-
LG3	s3_853519	4.886	<lmxll>	{1-}	0	0	0	80	82	0	0	4	0.02	1	-
LG3	s3_1517441	4.902	<lmxll>	{1-}	0	0	0	80	83	0	0	3	0.06	1	-
LG3	s3_1517551	4.905	<lmxll>	{1-}	0	0	0	80	86	0	0	0	0.22	1	-
LG3	s3_673070	5.491	<lmxll>	{1-}	0	0	0	77	82	0	0	7	0.16	1	-
LG3	s3_446641	5.503	<lmxll>	{1-}	0	0	0	79	82	0	0	5	0.06	1	-
LG3	s3_225999	5.508	<lmxll>	{1-}	0	0	0	79	83	0	0	4	0.1	1	-
LG3	s3_208499	5.514	<lmxll>	{1-}	0	0	0	79	83	0	0	4	0.1	1	-
LG3	s3_96273	5.528	<lmxll>	{1-}	0	0	0	79	86	0	0	1	0.3	1	-
LG3	s3_846140	5.858	<hkxhk>	{00}	41	92	33	0	0	0	0	0	2.72	2	-
LG3	s3_1439825	6.985	<nnxnp>	{-1}	0	0	0	0	0	79	79	8	0	1	-
LG3	s3_512226	7.086	<nnxnp>	{-1}	0	0	0	0	0	79	87	0	0.39	1	-
LG3	s3_1439202	7.116	<nnxnp>	{-1}	0	0	0	0	0	79	86	1	0.3	1	-
LG3	s3_1440110	8.281	<nnxnp>	{-1}	0	0	0	0	0	79	82	5	0.06	1	-
LG3	s3_1870731	9.183	<hkxhk>	{11}	35	88	43	0	0	0	0	0	1.37	2	-
LG3	s3_1615197	12.077	<nnxnp>	{-1}	0	0	0	0	0	79	78	9	0.01	1	-
LG3	s3_2721334	14.64	<hkxhk>	{11}	33	85	48	0	0	0	0	0	2.81	2	-
LG3	BPPCT-007	15.552	<hkxhk>	{00}	46	87	33	0	0	0	0	0	2.42	2	-
LG3	s3_4475039	16.292	<lmxll>	{1-}	0	0	0	77	87	0	0	2	0.61	1	-
LG3	s3_2923363	19.375	<hkxhk>	{11}	49	73	42	0	0	0	0	2	2.57	2	-
LG3	s3_3301483	22.553	<hkxhk>	{11}	33	82	51	0	0	0	0	0	3.93	2	-
LG3	s3_3301497	22.553	<hkxhk>	{00}	51	82	33	0	0	0	0	0	3.93	2	-
LG3	s3_4194966	26.146	<lmxll>	{1-}	0	0	0	81	76	0	0	9	0.16	1	-
LG3	s3_3987687	26.454	<lmxll>	{1-}	0	0	0	79	75	0	0	12	0.1	1	-
LG3	s3_4224131	27.592	<hkxhk>	{11}	44	78	42	0	0	0	0	2	0.44	2	-
LG3	s3_4988156	31.179	<lmxll>	{1-}	0	0	0	79	83	0	0	4	0.1	1	-
LG3	s3_4879172	31.216	<hkxhk>	{00}	38	91	37	0	0	0	0	0	1.55	2	-
LG3	s3_5416007	31.477	<nnxnp>	{-0}	0	0	0	0	0	80	85	1	0.15	1	-
LG3	s3_4797010	32.453	<hkxhk>	{00}	42	83	40	0	0	0	0	1	0.05	2	-
LG3	s3_4802702	36.728	<hkxhk>	{11}	50	62	44	0	0	0	0	10	7.03	2	**
LG3	s3_5812934	37.742	<nnxnp>	{-0}	0	0	0	0	0	74	92	0	1.95	1	-
LG3	s3_5616597	38.389	<nnxnp>	{-0}	0	0	0	0	0	73	93	0	2.41	1	-
LG3	s3_5602819	38.39	<nnxnp>	{-0}	0	0	0	0	0	73	89	4	1.58	1	-
LG3	s3_9783189	40.571	<lmxll>	{0-}	0	0	0	85	77	0	0	4	0.4	1	-
LG3	s3_6355796	42.011	<nnxnp>	{-0}	0	0	0	0	0	73	93	0	2.41	1	-
LG3	s3_6781685	42.514	<nnxnp>	{-0}	0	0	0	0	0	72	92	2	2.44	1	-
LG3	s3_6777599	42.521	<nnxnp>	{-0}	0	0	0	0	0	72	94	0	2.92	1	*
LG3	s3_6781635	42.591	<nnxnp>	{-0}	0	0	0	0	0	72	92	2	2.44	1	-
LG3	s3_9826594	42.782	<lmxll>	{1-}	0	0	0	80	86	0	0	0	0.22	1	-
LG3	s3_7320285	43.026	<nnxnp>	{-0}	0	0	0	0	0	71	94	1	3.21	1	*
LG3	s3_8552617	43.032	<nnxnp>	{-0}	0	0	0	0	0	71	95	0	3.47	1	*
LG3	s3_8552232	43.057	<nnxnp>	{-0}	0	0	0	0	0	70	92	4	2.99	1	*
LG3	s3_10737930	43.416	<nnxnp>	{-1}	0	0	0	0	0	94	72	0	2.92	1	*
LG3	s3_7663296	43.605	<nnxnp>	{-0}	0	0	0	0	0	72	88	6	1.6	1	-
LG3	s3_7604385	43.612	<nnxnp>	{-0}	0	0	0	0	0	72	94	0	2.92	1	*
LG3	s3_8480308	43.879	<nnxnp>	{-0}	0	0	0	0	0	74	92	0	1.95	1	-
LG3	s3_12383969	45.521	<lmxll>	{0-}	0	0	0	88	72	0	0	6	1.6	1	-
LG3	s3_10675302	46.184	<hkxhk>	{01}	52	79	35	0	0	0	0	0	3.87	2	-
LG3	s3_12712447	47.402	<lmxll>	{1-}	0	0	0	79	87	0	0	0	0.39	1	-
LG3	s3_12501345	47.769	<hkxhk>	{10}	33	80	53	0	0	0	0	0	5.04	2	*
LG3	s3_13229472	52.338	<hkxhk>	{01}	57	72	37	0	0	0	0	0	7.73	2	**
LG3	s3_13767131	53.566	<hkxhk>	{00}	40	75	48	0	0	0	0	3	1.82	2	-
LG3	s3_13417026	53.936	<lmxll>	{1-}	0	0	0	80	83	0	0	3	0.06	1	-
LG3	s3_13779550	55.835	<lmxll>	{1-}	0	0	0	79	87	0	0	0	0.39	1	-
LG3	s3_14033830	56.774	<hkxhk>	{00}	36	84	46	0	0	0	0	0	1.23	2	-
LG3	s3_14559381	58.102	<hkxhk>	{00}	35	78	53	0	0	0	0	0	4.51	2	-
LG3	s3_15691821	61.811	<hkxhk>	{00}	41	69	55	0	0	0	0	1	6.79	2	**
LG3	s3_15463298	62.569	<lmxll>	{0-}	0	0	0	84	79	0	0	3	0.15	1	-
LG3	s3_15681482	63.559	<hkxhk>	{00}	37	78	51	0	0	0	0	0	2.96	2	-
LG3	s3_15681566	64.005	<hkxhk>	{11}	52	78	36	0	0	0	0	0	3.69	2	-
LG3	s3_15472030	64.591	<lmxll>	{0-}	0	0	0	84	79	0	0	3	0.15	1	-
LG3	s3_16134649	65.376	<hkxhk>	{00}	35	82	49	0	0	0	0	0	2.39	2	-
LG3	s3_16222150	66.831	<hkxhk>	{00}	34	83	49	0	0	0	0	0	2.71	2	-
LG3	s3_16303010	67.3	<hkxhk>	{00}	34	85	47	0	0	0	0	0	2.13	2	-
LG3	s3_16098848	67.999	<lmxll>	{1-}	0	0	0	86	80	0	0	0	0.22	1	-
LG3	s3_16574434	69.538	<hkxhk>	{11}	50	78	38	0	0	0	0	0	2.34	2	-
LG3	s3_16574409	69.538	<hkxhk>	{00}	38	78	50	0	0	0	0	0	2.34	2	-
LG3	s3_16514767	70.148	<hkxhk>	{00}	32	87	47	0	0	0	0	0	3.1	2	-
LG3	s3_16552248	70.452	<hkxhk>	{00}	35	83	48	0	0	0	0	0	2.04	2	-
LG3	s3_17598484	70.969	<lmxll>	{0-}	0	0	0	83	76	0	0	7	0.31	1	-
LG3	s3_16670619	71.036	<hkxhk>	{00}	33	85	48	0	0	0	0	0	2.81	2	-
LG3	s3_17388280	71.741	<lmxll>	{0-}	0	0	0	82	83	0	0	1	0.01	1	-
LG3	s3_17034728	71.743	<lmxll>	{0-}	0	0	0	82	75	0	0	9	0.31	1	-
LG3	s3_17301940	71.765	<lmxll>	{0-}	0	0	0	82	83	0	0	1	0.01	1	-
LG3	s3_17367086	71.768	<lmxll>	{0-}	0	0	0	82	84	0	0	0	0.02	1	-
LG3	s3_17342357	71.782	<lmxll>	{0-}	0	0	0	82	82	0	0	2	0	1	-
LG3	s3_17349238	71.816	<lmxll>	{0-}	0	0	0	80	74	0	0	12	0.23	1	-
LG3	s3_17891918	72.997	<lmxll>	{1-}	0	0	0	86	80	0	0	0	0.22	1	-
LG3	s3_17388199	73.648	<lmxll>	{0-}	0	0	0	81	80	0	0	5	0.01	1	-
LG3	s3_17988922	73.692	<hkxhk>	{11}	46	88	32	0	0	0	0	0	2.96	2	-
LG3	s3_17988256	73.797	<hkxhk>	{11}	45	89	32	0	0	0	0	0	2.9	2	-
LG3	s3_17991196	74.184	<hkxhk>	{11}	47	84	35	0	0	0	0	0	1.76	2	-
LG3	s3_18138999	75.021	<hkxhk>	{00}	34	85	47	0	0	0	0	0	2.13	2	-
LG3	s3_18278501	75.571	<lmxll>	{1-}	0	0	0	82	84	0	0	0	0.02	1	-
LG3	s3_18275035	76.114	<hkxhk>	{11}	47	84	35	0	0	0	0	0	1.76	2	-
LG3	s3_18258127	76.314	<lmxll>	{1-}	0	0	0	80	81	0	0	5	0.01	1	-
LG3	s3_18458954	77.153	<hkxhk>	{00}	37	84	45	0	0	0	0	0	0.8	2	-
LG3	s3_18466073	77.238	<hkxhk>	{11}	44	88	34	0	0	0	0	0	1.81	2	-
LG3	s3_19139205	77.584	<nnxnp>	{-1}	0	0	0	0	0	93	68	5	3.88	1	**
LG3	s3_19180169	77.636	<nnxnp>	{-1}	0	0	0	0	0	93	70	3	3.25	1	*
LG3	s3_19210200	77.679	<nnxnp>	{-1}	0	0	0	0	0	93	72	1	2.67	1	-
LG3	s3_19396787	77.763	<nnxnp>	{-1}	0	0	0	0	0	93	70	3	3.25	1	*
LG3	s3_19396742	77.773	<nnxnp>	{-1}	0	0	0	0	0	93	73	0	2.41	1	-
LG3	s3_19208921	77.839	<nnxnp>	{-1}	0	0	0	0	0	95	69	2	4.12	1	**
LG3	s3_18278453	78.027	<lmxll>	{1-}	0	0	0	85	78	0	0	3	0.3	1	-
LG3	s3_18417007	78.532	<hkxhk>	{11}	44	84	38	0	0	0	0	0	0.46	2	-
LG3	s3_19790245	79.143	<nnxnp>	{-1}	0	0	0	0	0	95	68	3	4.47	1	**
LG3	s3_19894677	80.151	<nnxnp>	{-1}	0	0	0	0	0	93	73	0	2.41	1	-
LG3	s3_19953469	80.173	<nnxnp>	{-1}	0	0	0	0	0	93	72	1	2.67	1	-
LG3	s3_18465330	81.79	<hkxhk>	{00}	42	71	50	0	0	0	0	3	3.49	2	-
LG3	s3_18469712	85.158	<hkxhk>	{11}	50	64	50	0	0	0	0	2	7.9	2	**
LG3	s3_20638122	87.556	<nnxnp>	{-1}	0	0	0	0	0	88	68	10	2.56	1	-
LG3	s3_20844524	87.959	<nnxnp>	{-1}	0	0	0	0	0	89	69	8	2.53	1	-
LG3	s3_21639696	88.017	<nnxnp>	{-1}	0	0	0	0	0	86	68	12	2.1	1	-
LG3	s3_21541212	88.987	<hkxhk>	{11}	40	88	38	0	0	0	0	0	0.65	2	-
LG3	s3_21083045	94.794	<hkxhk>	{00}	45	66	52	0	0	0	0	3	6.5	2	**
LG4	s4_377231	0	<nnxnp>	{-1}	0	0	0	0	0	88	73	5	1.4	1	-
LG4	s4_266996	0.155	<nnxnp>	{-1}	0	0	0	0	0	88	70	8	2.05	1	-
LG4	s4_570056	0.724	<nnxnp>	{-1}	0	0	0	0	0	87	79	0	0.39	1	-
LG4	s4_908792	1.579	<nnxnp>	{-1}	0	0	0	0	0	87	79	0	0.39	1	-
LG4	s4_1287822	2.205	<nnxnp>	{-1}	0	0	0	0	0	86	80	0	0.22	1	-
LG4	s4_1096650	2.205	<nnxnp>	{-0}	0	0	0	0	0	80	86	0	0.22	1	-
LG4	s4_1119110	2.829	<nnxnp>	{-1}	0	0	0	0	0	87	79	0	0.39	1	-
LG4	s4_2031599	6.435	<hkxhk>	{00}	50	71	31	0	0	0	0	14	5.41	2	*
LG4	s4_2520451	6.959	<nnxnp>	{-1}	0	0	0	0	0	89	75	2	1.2	1	-
LG4	s4_2242835	7.54	<nnxnp>	{-1}	0	0	0	0	0	88	78	0	0.6	1	-
LG4	s4_2520537	8.068	<nnxnp>	{-1}	0	0	0	0	0	89	76	1	1.02	1	-
LG4	s4_2460809	8.083	<nnxnp>	{-0}	0	0	0	0	0	77	87	2	0.61	1	-
LG4	s4_2515057	8.097	<nnxnp>	{-1}	0	0	0	0	0	89	76	1	1.02	1	-
LG4	s4_2532255	8.11	<nnxnp>	{-1}	0	0	0	0	0	89	77	0	0.87	1	-
LG4	s4_2186321	8.249	<nnxnp>	{-1}	0	0	0	0	0	88	64	14	3.79	1	*
LG4	s4_2928619	9.272	<nnxnp>	{-0}	0	0	0	0	0	75	91	0	1.54	1	-
LG4	s4_2971330	10.459	<nnxnp>	{-0}	0	0	0	0	0	73	93	0	2.41	1	-
LG4	s4_3161835	11.042	<nnxnp>	{-0}	0	0	0	0	0	72	94	0	2.92	1	*
LG4	s4_4473020	16.739	<nnxnp>	{-0}	0	0	0	0	0	70	89	7	2.27	1	-
LG4	s4_4414340	17.347	<nnxnp>	{-1}	0	0	0	0	0	97	68	1	5.1	1	**
LG4	s4_4692417	17.919	<nnxnp>	{-1}	0	0	0	0	0	98	68	0	5.42	1	**
LG4	s4_6384995	17.919	<nnxnp>	{-0}	0	0	0	0	0	68	98	0	5.42	1	**
LG4	s4_4772903	17.942	<nnxnp>	{-0}	0	0	0	0	0	68	95	3	4.47	1	**
LG4	s4_4773662	18.095	<nnxnp>	{-1}	0	0	0	0	0	98	66	2	6.24	1	**
LG4	s4_5172842	18.53	<nnxnp>	{-0}	0	0	0	0	0	69	97	0	4.72	1	**
LG4	s4_5172308	18.53	<nnxnp>	{-1}	0	0	0	0	0	97	69	0	4.72	1	**
LG4	s4_6350127	19.051	<nnxnp>	{-0}	0	0	0	0	0	70	95	1	3.79	1	*
LG4	s4_6176991	19.545	<nnxnp>	{-0}	0	0	0	0	0	69	94	3	3.83	1	*
LG4	s4_5333750	19.727	<nnxnp>	{-1}	0	0	0	0	0	97	69	0	4.72	1	**
LG4	s4_6292057	19.727	<nnxnp>	{-0}	0	0	0	0	0	69	97	0	4.72	1	**
LG4	s4_4458517	19.763	<nnxnp>	{-0}	0	0	0	0	0	68	94	4	4.17	1	**
LG4	s4_6512041	20.247	<nnxnp>	{-0}	0	0	0	0	0	68	97	1	5.1	1	**
LG4	s4_6967443	20.873	<nnxnp>	{-1}	0	0	0	0	0	95	71	0	3.47	1	*
LG4	s4_6264447	20.93	<nnxnp>	{-0}	0	0	0	0	0	71	91	4	2.47	1	-
LG4	s4_10301063	26.867	<nnxnp>	{-0}	0	0	0	0	0	67	89	10	3.1	1	*
LG4	s4_9662069	27.546	<nnxnp>	{-0}	0	0	0	0	0	66	99	1	6.6	1	**
LG4	s4_10405809	28.655	<nnxnp>	{-0}	0	0	0	0	0	66	97	3	5.9	1	**
LG4	s6_17155242	33.972	<hkxhk>	{10}	3	116	47	0	0	0	0	0	49.57	2	*******
LG4	s4_11128756	35.357	<nnxnp>	{-0}	0	0	0	0	0	70	96	0	4.07	1	**
LG4	s4_11210410	37.303	<nnxnp>	{-0}	0	0	0	0	0	71	95	0	3.47	1	*
LG4	s4_11212028	37.823	<nnxnp>	{-0}	0	0	0	0	0	72	90	4	2	1	-
LG4	s4_11264993	37.946	<nnxnp>	{-0}	0	0	0	0	0	72	94	0	2.92	1	*
LG4	s4_11294081	38.284	<nnxnp>	{-0}	0	0	0	0	0	72	88	6	1.6	1	-
LG4	s4_14136810	42.842	<hkxhk>	{10}	26	92	48	0	0	0	0	0	7.78	2	**
LG4	s4_14109730	45.051	<hkxhk>	{10}	28	97	41	0	0	0	0	0	6.76	2	**
LG4	s4_13966821	45.396	<lmxll>	{0-}	0	0	0	82	84	0	0	0	0.02	1	-
LG4	s4_13982461	46.164	<hkxhk>	{10}	27	98	41	0	0	0	0	0	7.78	2	**
LG4	s4_13751491	46.549	<lmxll>	{0-}	0	0	0	84	73	0	0	9	0.77	1	-
LG4	s4_14145948	46.955	<nnxnp>	{-1}	0	0	0	0	0	98	68	0	5.42	1	**
LG4	s4_17082542	48.842	<nnxnp>	{-1}	0	0	0	0	0	97	69	0	4.72	1	**
LG4	s4_17074265	48.86	<nnxnp>	{-0}	0	0	0	0	0	69	95	2	4.12	1	**
LG4	s4_17747453	49.415	<nnxnp>	{-1}	0	0	0	0	0	96	70	0	4.07	1	**
LG4	s4_17428442	49.972	<nnxnp>	{-0}	0	0	0	0	0	69	92	5	3.29	1	*
LG4	s4_18437880	50.062	<nnxnp>	{-1}	0	0	0	0	0	97	69	0	4.72	1	**
LG4	s4_18375775	50.062	<nnxnp>	{-0}	0	0	0	0	0	69	97	0	4.72	1	**
LG4	s4_17897016	50.148	<nnxnp>	{-0}	0	0	0	0	0	69	96	1	4.42	1	**
LG4	s4_17932234	50.168	<nnxnp>	{-1}	0	0	0	0	0	97	68	1	5.1	1	**
LG4	s4_20549211	55.586	<nnxnp>	{-1}	0	0	0	0	0	93	63	10	5.77	1	**
LG4	s4_26850534	56.078	<nnxnp>	{-0}	0	0	0	0	0	71	94	1	3.21	1	*
LG4	s4_25996697	56.158	<nnxnp>	{-0}	0	0	0	0	0	71	93	2	2.95	1	*
LG4	s4_18129927	57.072	<lmxll>	{1-}	0	0	0	80	86	0	0	0	0.22	1	-
LG4	s6_11407414	59.194	<hkxhk>	{11}	84	66	11	0	0	0	0	5	71.42	2	*******
LG4	s4_26671992	64.878	<lmxll>	{0-}	0	0	0	88	78	0	0	0	0.6	1	-
LG4	s4_23042604	66.412	<lmxll>	{0-}	0	0	0	88	74	0	0	4	1.21	1	-
LG4	s4_22963499	66.416	<lmxll>	{0-}	0	0	0	88	77	0	0	1	0.73	1	-
LG4	s4_23042686	66.799	<lmxll>	{0-}	0	0	0	90	72	0	0	4	2	1	-
LG4	s4_23780118	66.809	<lmxll>	{0-}	0	0	0	90	72	0	0	4	2	1	-
LG4	s4_23042765	66.865	<lmxll>	{0-}	0	0	0	89	68	0	0	9	2.81	1	*
LG4	s4_23061047	67.271	<lmxll>	{0-}	0	0	0	89	72	0	0	5	1.8	1	-
LG4	s4_27322722	68.076	<lmxll>	{1-}	0	0	0	79	84	0	0	3	0.15	1	-
LG4	s4_26292908	70.682	<lmxll>	{0-}	0	0	0	88	71	0	0	7	1.82	1	-
LG5	s5_2771554	0	<hkxhk>	{01}	49	63	52	0	0	0	0	2	8.91	2	**
LG5	s5_2353413	0.922	<hkxhk>	{11}	37	72	55	0	0	0	0	2	6.39	2	**
LG5	s5_2401521	4.678	<hkxhk>	{00}	54	79	33	0	0	0	0	0	5.7	2	*
LG5	s5_1503173	6.175	<hkxhk>	{00}	53	80	33	0	0	0	0	0	5.04	2	*
LG5	s5_1741390	7.094	<hkxhk>	{11}	32	84	50	0	0	0	0	0	3.93	2	-
LG5	s5_1653084	8.137	<hkxhk>	{00}	48	83	35	0	0	0	0	0	2.04	2	-
LG5	s5_2722408	8.394	<lmxll>	{1-}	0	0	0	79	83	0	0	4	0.1	1	-
LG5	s5_2760029	8.436	<lmxll>	{1-}	0	0	0	79	85	0	0	2	0.22	1	-
LG5	s5_1986033	8.769	<lmxll>	{1-}	0	0	0	79	86	0	0	1	0.3	1	-
LG5	s5_1797623	9.05	<lmxll>	{0-}	0	0	0	88	76	0	0	2	0.88	1	-
LG5	s4_2613920	9.08	<lmxll>	{0-}	0	0	0	88	78	0	0	0	0.6	1	-
LG5	s5_1121958	9.856	<lmxll>	{0-}	0	0	0	86	70	0	0	10	1.64	1	-
LG5	s5_2516374	10.009	<nnxnp>	{-1}	0	0	0	0	0	70	96	0	4.07	1	**
LG5	s5_674862	10.833	<lmxll>	{0-}	0	0	0	85	79	0	0	2	0.22	1	-
LG5	s5_3597620	11.879	<nnxnp>	{-0}	0	0	0	0	0	96	70	0	4.07	1	**
LG5	s5_3517627	12.315	<hkxhk>	{00}	48	86	32	0	0	0	0	0	3.3	2	-
LG5	s5_389562	12.771	<lmxll>	{0-}	0	0	0	88	78	0	0	0	0.6	1	-
LG5	EPPCU-9168	13.386	<lmxll>	{0-}	0	0	0	89	77	0	0	0	0.87	1	-
LG5	s5_3232514	14.016	<lmxll>	{0-}	0	0	0	88	75	0	0	3	1.04	1	-
LG5	s5_3645100	14.545	<lmxll>	{0-}	0	0	0	87	79	0	0	0	0.39	1	-
LG5	s5_4211398	14.787	<hkxhk>	{00}	55	79	32	0	0	0	0	0	6.76	2	**
LG5	s5_3658213	15.127	<lmxll>	{0-}	0	0	0	88	74	0	0	4	1.21	1	-
LG5	BPPCT-026	15.186	<lmxll>	{0-}	0	0	0	88	78	0	0	0	0.6	1	-
LG5	s5_4682881	15.784	<hkxhk>	{10}	47	83	36	0	0	0	0	0	1.46	2	-
LG5	s5_4649816	15.847	<lmxll>	{1-}	0	0	0	79	87	0	0	0	0.39	1	-
LG5	s5_4962108	18.47	<lmxll>	{0-}	0	0	0	89	76	0	0	1	1.02	1	-
LG5	s5_6244373	19.413	<nnxnp>	{-0}	0	0	0	0	0	94	72	0	2.92	1	*
LG5	s5_5434536	19.517	<nnxnp>	{-0}	0	0	0	0	0	93	65	8	4.96	1	**
LG5	s5_4996423	20.343	<nnxnp>	{-0}	0	0	0	0	0	94	72	0	2.92	1	*
LG5	s5_5853190	20.937	<lmxll>	{0-}	0	0	0	89	77	0	0	0	0.87	1	-
LG5	s5_7759932	24.305	<hkxhk>	{11}	32	87	47	0	0	0	0	0	3.1	2	-
LG5	s5_7864151	24.554	<hkxhk>	{11}	34	85	47	0	0	0	0	0	2.13	2	-
LG5	s5_8793208	26.949	<lmxll>	{0-}	0	0	0	88	75	0	0	3	1.04	1	-
LG5	s5_8264772	28.255	<lmxll>	{0-}	0	0	0	88	72	0	0	6	1.6	1	-
LG5	s5_11429844	28.878	<hkxhk>	{11}	45	65	52	0	0	0	0	4	6.93	2	**
LG5	s5_11217763	31.386	<hkxhk>	{00}	45	81	40	0	0	0	0	0	0.4	2	-
LG5	s5_11727925	33.037	<hkxhk>	{11}	44	68	54	0	0	0	0	0	6.63	2	**
LG5	s5_11598583	34.553	<hkxhk>	{11}	39	78	49	0	0	0	0	0	1.81	2	-
LG5	s5_12111965	34.946	<lmxll>	{1-}	0	0	0	77	81	0	0	8	0.1	1	-
LG5	s5_11707170	35.117	<hkxhk>	{11}	39	75	52	0	0	0	0	0	3.58	2	-
LG5	s5_12091154	35.63	<lmxll>	{1-}	0	0	0	76	86	0	0	4	0.62	1	-
LG5	s5_12035052	35.739	<lmxll>	{1-}	0	0	0	76	90	0	0	0	1.18	1	-
LG5	BPPCT-037	36.323	<lmxll>	{1-}	0	0	0	75	91	0	0	0	1.54	1	-
LG5	s5_11883742	37.441	<hkxhk>	{00}	51	79	36	0	0	0	0	0	3.1	2	-
LG5	s2_9458303	37.966	<hkxhk>	{11}	37	76	53	0	0	0	0	0	4.27	2	-
LG5	s5_12874828	38.333	<lmxll>	{1-}	0	0	0	75	89	0	0	2	1.2	1	-
LG5	s5_12784379	38.614	<lmxll>	{1-}	0	0	0	75	91	0	0	0	1.54	1	-
LG5	s5_13008786	40.527	<lmxll>	{1-}	0	0	0	78	87	0	0	1	0.49	1	-
LG5	s5_13291324	40.543	<lmxll>	{1-}	0	0	0	78	88	0	0	0	0.6	1	-
LG5	s5_13215786	40.707	<lmxll>	{1-}	0	0	0	78	86	0	0	2	0.39	1	-
LG5	s5_13311336	41.076	<lmxll>	{1-}	0	0	0	79	86	0	0	1	0.3	1	-
LG5	s5_13507676	41.779	<lmxll>	{1-}	0	0	0	78	84	0	0	4	0.22	1	-
LG5	s5_13626558	44.671	<nnxnp>	{-1}	0	0	0	0	0	74	86	6	0.9	1	-
LG5	s5_13843020	45.35	<lmxll>	{1-}	0	0	0	80	84	0	0	2	0.1	1	-
LG5	s5_14167714	45.837	<hkxhk>	{00}	56	66	43	0	0	0	0	1	8.65	2	**
LG5	s5_14146695	46.294	<hkxhk>	{11}	38	70	58	0	0	0	0	0	8.89	2	**
LG5	s5_13924258	46.613	<hkxhk>	{11}	38	71	57	0	0	0	0	0	7.82	2	**
LG5	s5_13859152	46.86	<lmxll>	{1-}	0	0	0	80	86	0	0	0	0.22	1	-
LG5	s5_13713738	47.139	<hkxhk>	{11}	35	78	53	0	0	0	0	0	4.51	2	-
LG5	s5_14174060	47.682	<lmxll>	{1-}	0	0	0	81	78	0	0	7	0.06	1	-
LG5	s5_14415927	48.084	<nnxnp>	{-1}	0	0	0	0	0	75	82	9	0.31	1	-
LG5	s5_14180472	48.09	<lmxll>	{1-}	0	0	0	82	84	0	0	0	0.02	1	-
LG5	s5_14241081	49.658	<lmxll>	{1-}	0	0	0	82	76	0	0	8	0.23	1	-
LG5	s5_13706196	49.915	<nnxnp>	{-1}	0	0	0	0	0	69	97	0	4.72	1	**
LG5	s5_14294597	50.273	<lmxll>	{1-}	0	0	0	84	74	0	0	8	0.63	1	-
LG5	s5_14294478	50.429	<nnxnp>	{-1}	0	0	0	0	0	73	92	1	2.19	1	-
LG5	s5_14358075	50.6	<hkxhk>	{11}	39	76	51	0	0	0	0	0	2.92	2	-
LG5	BPPCT-038	51.767	<lmxll>	{1-}	0	0	0	84	82	0	0	0	0.02	1	-
LG5	s5_14441107	52.712	<nnxnp>	{-1}	0	0	0	0	0	70	89	7	2.27	1	-
LG5	s5_14934878	53.404	<lmxll>	{1-}	0	0	0	85	76	0	0	5	0.5	1	-
LG5	s5_14896352	53.576	<hkxhk>	{00}	52	73	41	0	0	0	0	0	3.87	2	-
LG5	s5_14935123	53.703	<lmxll>	{1-}	0	0	0	85	77	0	0	4	0.4	1	-
LG5	s5_14502341	53.812	<nnxnp>	{-1}	0	0	0	0	0	71	95	0	3.47	1	*
LG5	s5_15123033	54.56	<hkxhk>	{00}	52	71	43	0	0	0	0	0	4.45	2	-
LG5	s5_15044200	54.823	<lmxll>	{1-}	0	0	0	85	80	0	0	1	0.15	1	-
LG5	EMPaS-14	54.83	<lmxll>	{1-}	0	0	0	85	81	0	0	0	0.1	1	-
LG5	s5_15253761	55.117	<lmxll>	{1-}	0	0	0	84	76	0	0	6	0.4	1	-
LG5	s5_15306167	55.379	<lmxll>	{1-}	0	0	0	84	81	0	0	1	0.05	1	-
LG5	s5_15094355	55.386	<lmxll>	{1-}	0	0	0	84	81	0	0	1	0.05	1	-
LG5	s5_15138839	55.388	<lmxll>	{1-}	0	0	0	84	82	0	0	0	0.02	1	-
LG5	s5_15306287	55.389	<lmxll>	{1-}	0	0	0	84	81	0	0	1	0.05	1	-
LG5	s5_15120020	55.394	<lmxll>	{1-}	0	0	0	84	75	0	0	7	0.51	1	-
LG5	s5_14706173	55.715	<nnxnp>	{-1}	0	0	0	0	0	72	91	3	2.21	1	-
LG5	s5_15121724	56.272	<hkxhk>	{11}	38	81	47	0	0	0	0	0	1.07	2	-
LG5	s5_15606060	56.617	<lmxll>	{1-}	0	0	0	84	82	0	0	0	0.02	1	-
LG5	s5_15005383	56.873	<nnxnp>	{-1}	0	0	0	0	0	72	89	5	1.8	1	-
LG5	s5_15001660	57.016	<nnxnp>	{-1}	0	0	0	0	0	72	94	0	2.92	1	*
LG5	s5_15018254	57.023	<nnxnp>	{-1}	0	0	0	0	0	72	92	2	2.44	1	-
LG5	s5_15733705	57.914	<hkxhk>	{00}	49	72	44	0	0	0	0	1	2.98	2	-
LG5	s5_15727610	58.271	<hkxhk>	{11}	37	82	47	0	0	0	0	0	1.23	2	-
LG5	s5_15734175	58.422	<hkxhk>	{00}	47	81	38	0	0	0	0	0	1.07	2	-
LG5	s5_15734369	58.498	<hkxhk>	{00}	47	80	39	0	0	0	0	0	0.99	2	-
LG5	s5_15464031	58.878	<nnxnp>	{-1}	0	0	0	0	0	71	88	7	1.82	1	-
LG5	s5_15741094	58.968	<hkxhk>	{11}	39	78	48	0	0	0	0	1	1.47	2	-
LG5	s5_15459470	59.101	<nnxnp>	{-1}	0	0	0	0	0	70	94	2	3.51	1	*
LG5	s5_15795559	60.343	<hkxhk>	{00}	51	74	41	0	0	0	0	0	3.16	2	-
LG5	s5_16355934	60.894	<lmxll>	{1-}	0	0	0	81	85	0	0	0	0.1	1	-
LG5	s5_16372159	60.924	<lmxll>	{1-}	0	0	0	81	81	0	0	4	0	1	-
LG5	s5_16362370	61.859	<nnxnp>	{-1}	0	0	0	0	0	73	90	3	1.77	1	-
LG5	s5_16508701	62.724	<hkxhk>	{11}	40	75	51	0	0	0	0	0	3	2	-
LG5	s5_16729547	63.513	<nnxnp>	{-1}	0	0	0	0	0	74	83	9	0.52	1	-
LG5	s5_16577425	63.577	<nnxnp>	{-1}	0	0	0	0	0	74	92	0	1.95	1	-
LG5	s5_16924932	64.369	<nnxnp>	{-1}	0	0	0	0	0	73	90	3	1.77	1	-
LG5	s5_17069677	65.025	<nnxnp>	{-1}	0	0	0	0	0	67	89	10	3.1	1	*
LG5	s5_16422823	65.275	<nnxnp>	{-1}	0	0	0	0	0	73	88	5	1.4	1	-
LG5	s5_17116581	65.343	<lmxll>	{1-}	0	0	0	82	81	0	0	3	0.01	1	-
LG5	s5_16980917	65.69	<lmxll>	{1-}	0	0	0	81	83	0	0	2	0.02	1	-
LG5	s5_17269821	65.778	<lmxll>	{1-}	0	0	0	81	82	0	0	3	0.01	1	-
LG5	s5_17062870	65.805	<lmxll>	{1-}	0	0	0	81	85	0	0	0	0.1	1	-
LG5	s5_16321505	65.978	<lmxll>	{1-}	0	0	0	78	76	0	0	12	0.03	1	-
LG5	s5_16852601	66.424	<lmxll>	{1-}	0	0	0	80	86	0	0	0	0.22	1	-
LG5	s5_17659161	67.432	<lmxll>	{1-}	0	0	0	80	84	0	0	2	0.1	1	-
LG5	s5_17573812	67.54	<lmxll>	{1-}	0	0	0	80	82	0	0	4	0.02	1	-
LG5	s5_17402195	67.677	<lmxll>	{1-}	0	0	0	80	86	0	0	0	0.22	1	-
LG5	s5_17574501	67.691	<lmxll>	{1-}	0	0	0	80	85	0	0	1	0.15	1	-
LG5	s5_17876167	67.767	<lmxll>	{1-}	0	0	0	78	75	0	0	13	0.06	1	-
LG5	s5_17750346	67.98	<lmxll>	{1-}	0	0	0	77	74	0	0	15	0.06	1	-
LG5	s5_18370425	68.129	<lmxll>	{1-}	0	0	0	81	85	0	0	0	0.1	1	-
LG5	s5_18336406	68.15	<lmxll>	{1-}	0	0	0	81	80	0	0	5	0.01	1	-
LG5	s5_18364486	68.156	<lmxll>	{1-}	0	0	0	80	85	0	0	1	0.15	1	-
LG5	s5_17635941	68.257	<hkxhk>	{00}	49	76	41	0	0	0	0	0	1.95	2	-
LG5	s5_17381684	68.311	<nnxnp>	{-1}	0	0	0	0	0	78	88	0	0.6	1	-
LG5	s5_17684451	68.959	<hkxhk>	{11}	43	69	53	0	0	0	0	1	5.63	2	*
LG5	s5_17822012	69.508	<hkxhk>	{11}	42	76	48	0	0	0	0	0	1.61	2	-
LG5	s5_17997679	70.044	<hkxhk>	{11}	41	77	48	0	0	0	0	0	1.46	2	-
LG5	s5_17651176	70.55	<hkxhk>	{00}	51	70	44	0	0	0	0	1	4.38	2	-
LG5	s5_17210622	71.535	<hkxhk>	{00}	52	68	46	0	0	0	0	0	5.86	2	*
LG5	s5_18242570	72.083	<nnxnp>	{-1}	0	0	0	0	0	78	86	2	0.39	1	-
LG5	s5_17998251	72.198	<nnxnp>	{-1}	0	0	0	0	0	77	82	7	0.16	1	-
LG5	s5_18117356	72.29	<nnxnp>	{-1}	0	0	0	0	0	78	88	0	0.6	1	-
LG5	s5_18097112	72.359	<nnxnp>	{-1}	0	0	0	0	0	78	85	3	0.3	1	-
LG5	s5_17958074	74.511	<hkxhk>	{00}	47	67	50	0	0	0	0	2	5.6	2	*
LG5	s5_18105080	75.542	<nnxnp>	{-1}	0	0	0	0	0	80	77	9	0.06	1	-
LG5	s5_18101706	75.656	<nnxnp>	{-1}	0	0	0	0	0	80	73	13	0.32	1	-
LG5	s5_18101688	75.825	<nnxnp>	{-1}	0	0	0	0	0	80	74	12	0.23	1	-
LG6	s6_2202660	0	<hkxhk>	{01}	57	34	59	0	0	0	0	16	44.88	2	*******
LG6	s6_3585215	8.264	<hkxhk>	{10}	43	65	54	0	0	0	0	4	7.81	2	**
LG6	s6_721960	10.206	<nnxnp>	{-0}	0	0	0	0	0	82	80	4	0.02	1	-
LG6	s6_4245831	11.795	<nnxnp>	{-1}	0	0	0	0	0	83	79	4	0.1	1	-
LG6	s6_757460	12.403	<hkxhk>	{00}	48	80	38	0	0	0	0	0	1.42	2	-
LG6	s6_2312275	14.866	<nnxnp>	{-1}	0	0	0	0	0	82	81	3	0.01	1	-
LG6	CPSCT-002	14.875	<nnxnp>	{-0}	0	0	0	0	0	83	83	0	0	1	-
LG6	s6_2312282	14.93	<nnxnp>	{-0}	0	0	0	0	0	85	79	2	0.22	1	-
LG6	s6_3511911	15.054	<nnxnp>	{-1}	0	0	0	0	0	85	79	2	0.22	1	-
LG6	s6_3244211	15.532	<nnxnp>	{-1}	0	0	0	0	0	84	80	2	0.1	1	-
LG6	s6_3789625	15.54	<nnxnp>	{-1}	0	0	0	0	0	84	82	0	0.02	1	-
LG6	s6_953503	16.001	<lmxll>	{0-}	0	0	0	90	70	0	0	6	2.5	1	-
LG6	s6_3912141	16.925	<hkxhk>	{00}	46	82	38	0	0	0	0	0	0.8	2	-
LG6	s6_2157551	17.121	<nnxnp>	{-1}	0	0	0	0	0	83	83	0	0	1	-
LG6	s6_4414263	17.536	<lmxll>	{0-}	0	0	0	91	75	0	0	0	1.54	1	-
LG6	s6_4329192	17.712	<lmxll>	{1-}	0	0	0	75	90	0	0	1	1.36	1	-
LG6	s6_1853295	19.995	<nnxnp>	{-0}	0	0	0	0	0	80	74	12	0.23	1	-
LG6	s6_1845874	20.496	<nnxnp>	{-0}	0	0	0	0	0	80	85	1	0.15	1	-
LG6	s6_3717000	21.205	<lmxll>	{0-}	0	0	0	93	73	0	0	0	2.41	1	-
LG6	s6_1887127	23.173	<hkxhk>	{00}	47	77	42	0	0	0	0	0	1.17	2	-
LG6	s6_342732	23.924	<hkxhk>	{10}	38	80	48	0	0	0	0	0	1.42	2	-
LG6	s6_329001	25.906	<nnxnp>	{-1}	0	0	0	0	0	83	81	2	0.02	1	-
LG6	s6_493025	27.105	<nnxnp>	{-0}	0	0	0	0	0	85	81	0	0.1	1	-
LG6	s6_655874	27.433	<nnxnp>	{-0}	0	0	0	0	0	85	74	7	0.76	1	-
LG6	s6_614051	27.467	<nnxnp>	{-0}	0	0	0	0	0	85	79	2	0.22	1	-
LG6	s6_473011	28.417	<lmxll>	{0-}	0	0	0	92	74	0	0	0	1.95	1	-
LG6	s6_4852620	30.271	<nnxnp>	{-0}	0	0	0	0	0	88	77	1	0.73	1	-
LG6	s6_5955043	31.184	<hkxhk>	{10}	39	89	38	0	0	0	0	0	0.88	2	-
LG6	s6_5725559	31.623	<hkxhk>	{01}	39	88	39	0	0	0	0	0	0.6	2	-
LG6	s6_5383318	31.677	<lmxll>	{0-}	0	0	0	88	69	0	0	9	2.3	1	-
LG6	s6_5439613	31.711	<hkxhk>	{10}	39	88	39	0	0	0	0	0	0.6	2	-
LG6	s6_5462434	31.783	<lmxll>	{0-}	0	0	0	88	77	0	0	1	0.73	1	-
LG6	s6_5391830	31.795	<lmxll>	{0-}	0	0	0	88	78	0	0	0	0.6	1	-
LG6	s6_5881398	31.795	<lmxll>	{1-}	0	0	0	78	88	0	0	0	0.6	1	-
LG6	s6_6089367	31.799	<lmxll>	{1-}	0	0	0	78	87	0	0	1	0.49	1	-
LG6	s6_5144797	32.026	<lmxll>	{0-}	0	0	0	89	76	0	0	1	1.02	1	-
LG6	s6_5147321	32.031	<lmxll>	{0-}	0	0	0	89	77	0	0	0	0.87	1	-
LG6	s6_5059268	32.272	<lmxll>	{0-}	0	0	0	90	76	0	0	0	1.18	1	-
LG6	s6_5306358	32.315	<nnxnp>	{-1}	0	0	0	0	0	78	86	2	0.39	1	-
LG6	s6_5906760	32.788	<hkxhk>	{10}	39	90	37	0	0	0	0	0	1.23	2	-
LG6	s6_5094301	33.33	<nnxnp>	{-0}	0	0	0	0	0	86	74	6	0.9	1	-
LG6	s6_6093473	33.653	<hkxhk>	{01}	40	86	39	0	0	0	0	1	0.31	2	-
LG6	s6_6795605	36.644	<nnxnp>	{-1}	0	0	0	0	0	77	89	0	0.87	1	-
LG6	s6_6645885	36.753	<hkxhk>	{10}	40	86	40	0	0	0	0	0	0.22	2	-
LG6	s6_7070366	36.957	<nnxnp>	{-1}	0	0	0	0	0	76	80	10	0.1	1	-
LG6	s6_7076378	39.42	<lmxll>	{1-}	0	0	0	84	81	0	0	1	0.05	1	-
LG6	s6_7013688	39.636	<nnxnp>	{-1}	0	0	0	0	0	74	84	8	0.63	1	-
LG6	s6_10372637	42.795	<hkxhk>	{11}	56	41	64	0	0	0	0	5	39.56	2	*******
LG6	s6_11568817	48.188	<hkxhk>	{00}	79	44	35	0	0	0	0	8	55.52	2	*******
LG6	s6_27628608	48.749	<nnxnp>	{-0}	0	0	0	0	0	89	61	16	5.23	1	**
LG6	s6_8105464	48.86	<nnxnp>	{-0}	0	0	0	0	0	98	68	0	5.42	1	**
LG6	s6_8306803	48.916	<nnxnp>	{-0}	0	0	0	0	0	97	62	7	7.7	1	***
LG6	s6_8127493	48.975	<nnxnp>	{-0}	0	0	0	0	0	98	64	4	7.14	1	***
LG6	s6_8365797	50.069	<nnxnp>	{-0}	0	0	0	0	0	100	65	1	7.42	1	***
LG6	s6_10261093	50.674	<lmxll>	{0-}	0	0	0	83	69	0	0	14	1.29	1	-
LG6	s6_8679634	50.71	<nnxnp>	{-0}	0	0	0	0	0	101	65	0	7.81	1	***
LG6	s6_10071956	51.183	<nnxnp>	{-1}	0	0	0	0	0	66	94	6	4.9	1	**
LG6	s6_8999897	51.291	<nnxnp>	{-0}	0	0	0	0	0	100	64	2	7.9	1	****
LG6	s6_8303976	51.343	<nnxnp>	{-0}	0	0	0	0	0	100	64	2	7.9	1	****
LG6	s6_9273060	51.344	<nnxnp>	{-0}	0	0	0	0	0	100	66	0	6.96	1	***
LG6	s6_9273932	51.344	<nnxnp>	{-1}	0	0	0	0	0	66	100	0	6.96	1	***
LG6	s6_9629086	51.344	<nnxnp>	{-0}	0	0	0	0	0	99	66	1	6.6	1	**
LG6	s6_9824681	51.348	<nnxnp>	{-1}	0	0	0	0	0	66	99	1	6.6	1	**
LG6	s6_9700647	51.356	<nnxnp>	{-0}	0	0	0	0	0	100	65	1	7.42	1	***
LG6	s6_8633781	51.532	<nnxnp>	{-0}	0	0	0	0	0	100	57	9	11.78	1	*****
LG6	s6_6414982	52.068	<hkxhk>	{10}	1	114	51	0	0	0	0	0	53.28	2	*******
LG6	s6_10580193	52.671	<hkxhk>	{00}	64	61	41	0	0	0	0	0	18.04	2	******
LG6	s6_10369972	53.208	<hkxhk>	{00}	60	67	39	0	0	0	0	0	11.48	2	****
LG6	s6_11068840	54.01	<lmxll>	{1-}	0	0	0	79	78	0	0	9	0.01	1	-
LG6	s6_9991105	54.12	<lmxll>	{1-}	0	0	0	78	85	0	0	3	0.3	1	-
LG6	s6_11846158	54.121	<lmxll>	{1-}	0	0	0	78	86	0	0	2	0.39	1	-
LG6	s6_11070239	54.129	<lmxll>	{1-}	0	0	0	78	88	0	0	0	0.6	1	-
LG6	s6_11068712	54.171	<lmxll>	{1-}	0	0	0	78	79	0	0	9	0.01	1	-
LG6	s6_9993620	54.188	<lmxll>	{1-}	0	0	0	78	83	0	0	5	0.16	1	-
LG6	s6_11165633	54.242	<lmxll>	{1-}	0	0	0	78	74	0	0	14	0.11	1	-
LG6	s6_10580074	54.295	<nnxnp>	{-1}	0	0	0	0	0	63	92	11	5.43	1	**
LG6	s6_11112255	54.626	<hkxhk>	{11}	37	65	64	0	0	0	0	0	16.59	2	******
LG6	s6_11112146	54.749	<hkxhk>	{00}	65	64	37	0	0	0	0	0	18.14	2	******
LG6	s6_11141969	55.539	<hkxhk>	{11}	40	58	68	0	0	0	0	0	24.51	2	*******
LG6	s6_840051	57.171	<nnxnp>	{-1}	0	0	0	0	0	58	108	0	15.06	1	******
LG6	s6_12395905	57.425	<hkxhk>	{11}	33	59	72	0	0	0	0	2	31.45	2	*******
LG6	s6_11969302	57.924	<nnxnp>	{-1}	0	0	0	0	0	57	109	0	16.29	1	*******
LG6	s6_13491725	59.047	<hkxhk>	{11}	36	59	71	0	0	0	0	0	28.64	2	*******
LG6	CPPCT-029	59.175	<nnxnp>	{-1}	0	0	0	0	0	55	111	0	18.89	1	*******
LG6	s6_18132714	59.799	<nnxnp>	{-1}	0	0	0	0	0	54	112	0	20.27	1	*******
LG6	s6_17911451	59.799	<nnxnp>	{-0}	0	0	0	0	0	112	54	0	20.27	1	*******
LG6	EMPA-004	60.085	<hkxhk>	{00}	66	68	31	0	0	0	0	1	19.95	2	*******
LG6	s6_15334972	60.412	<hkxhk>	{00}	70	62	34	0	0	0	0	0	26.24	2	*******
LG6	s6_15460181	61.557	<hkxhk>	{11}	31	65	70	0	0	0	0	0	26.13	2	*******
LG6	s6_16340762	61.991	<hkxhk>	{00}	69	66	31	0	0	0	0	0	24.36	2	*******
LG6	s6_18968864	62.248	<nnxnp>	{-0}	0	0	0	0	0	113	51	2	23.44	1	*******
LG6	pchcms5	62.747	<nnxnp>	{-1}	0	0	0	0	0	29	75	62	20.35	1	*******
LG6	s6_16253391	63.079	<lmxll>	{1-}	0	0	0	74	91	0	0	1	1.75	1	-
LG6	s6_16811089	63.484	<hkxhk>	{00}	73	57	36	0	0	0	0	0	32.78	2	*******
LG6	s6_17730538	64.276	<hkxhk>	{01}	22	100	44	0	0	0	0	0	12.8	2	****
LG6	s6_18081891	65.182	<hkxhk>	{10}	43	95	27	0	0	0	0	1	6.89	2	**
LG6	s6_16986857	65.745	<lmxll>	{1-}	0	0	0	75	88	0	0	3	1.04	1	-
LG6	s6_17518036	66.667	<lmxll>	{1-}	0	0	0	77	85	0	0	4	0.4	1	-
LG6	s6_17297466	66.758	<lmxll>	{1-}	0	0	0	77	88	0	0	1	0.73	1	-
LG6	s6_17581556	66.936	<lmxll>	{1-}	0	0	0	77	87	0	0	2	0.61	1	-
LG6	s6_17702145	67.729	<lmxll>	{1-}	0	0	0	75	88	0	0	3	1.04	1	-
LG6	s6_18565028	68.104	<lmxll>	{1-}	0	0	0	74	92	0	0	0	1.95	1	-
LG6	s6_17589193	68.644	<lmxll>	{1-}	0	0	0	73	85	0	0	8	0.91	1	-
LG6	s6_16615654	68.988	<hkxhk>	{00}	75	45	42	0	0	0	0	4	45.44	2	*******
LG6	s6_16476086	73.59	<hkxhk>	{00}	62	36	61	0	0	0	0	7	47.62	2	*******
LG6	s6_22659585	78.268	<lmxll>	{1-}	0	0	0	72	89	0	0	5	1.8	1	-
LG6	s6_22735786	78.502	<lmxll>	{1-}	0	0	0	72	86	0	0	8	1.24	1	-
LG6	s6_22759256	79.521	<lmxll>	{1-}	0	0	0	72	84	0	0	10	0.92	1	-
LG6	s6_22971318	80.016	<nnxnp>	{-1}	0	0	0	0	0	25	140	1	80.15	1	*******
LG6	s6_23205045	80.196	<nnxnp>	{-1}	0	0	0	0	0	24	134	8	76.58	1	*******
LG6	s6_23198973	80.734	<nnxnp>	{-1}	0	0	0	0	0	24	139	3	81.13	1	*******
LG6	s6_23198953	81.204	<nnxnp>	{-1}	0	0	0	0	0	23	130	13	74.83	1	*******
LG6	s6_25092887	85.152	<hkxhk>	{11}	2	75	89	0	0	0	0	0	92.73	2	*******
LG6	s6_25355347	85.943	<lmxll>	{0-}	0	0	0	91	71	0	0	4	2.47	1	-
LG6	s6_24221201	86.604	<nnxnp>	{-1}	0	0	0	0	0	14	147	5	109.87	1	*******
LG6	s6_25684848	86.955	<lmxll>	{0-}	0	0	0	90	72	0	0	4	2	1	-
LG6	s6_24325917	87.015	<nnxnp>	{-1}	0	0	0	0	0	14	152	0	114.72	1	*******
LG6	s6_24222819	87.933	<nnxnp>	{-1}	0	0	0	0	0	12	152	2	119.51	1	*******
LG6	s6_25367075	87.934	<hkxhk>	{10}	76	85	5	0	0	0	0	0	60.83	2	*******
LG6	s6_24477232	88.064	<nnxnp>	{-1}	0	0	0	0	0	12	152	2	119.51	1	*******
LG6	s6_25361410	88.392	<hkxhk>	{01}	3	86	77	0	0	0	0	0	66.19	2	*******
LG6	s6_25361375	88.529	<hkxhk>	{10}	76	87	3	0	0	0	0	0	64.59	2	*******
LG6	s6_25363666	88.926	<hkxhk>	{10}	79	84	3	0	0	0	0	0	69.61	2	*******
LG6	s6_26407153	89.938	<lmxll>	{0-}	0	0	0	89	73	0	0	4	1.58	1	-
LG6	s6_26407074	89.958	<lmxll>	{0-}	0	0	0	88	72	0	0	6	1.6	1	-
LG6	s6_26531169	90.377	<hkxhk>	{10}	76	85	5	0	0	0	0	0	60.83	2	*******
LG6	s6_26406726	90.852	<hkxhk>	{10}	77	88	1	0	0	0	0	0	70.19	2	*******
LG6	s6_26401614	90.992	<hkxhk>	{01}	0	89	77	0	0	0	0	0	72.3	2	*******
LG6	s6_26406680	91.236	<hkxhk>	{10}	77	86	3	0	0	0	0	0	66.19	2	*******
LG6	s6_26716111	91.585	<hkxhk>	{01}	4	85	77	0	0	0	0	0	64.3	2	*******
LG6	s6_26317121	92.028	<hkxhk>	{01}	4	83	79	0	0	0	0	0	67.77	2	*******
LG6	s6_26569556	92.538	<hkxhk>	{10}	78	87	1	0	0	0	0	0	71.82	2	*******
LG6	s6_26401546	93.394	<hkxhk>	{01}	1	84	81	0	0	0	0	0	77.13	2	*******
LG6	s6_28256832	94.204	<hkxhk>	{10}	77	85	4	0	0	0	0	0	64.3	2	*******
LG6	s6_26317220	95.107	<hkxhk>	{10}	82	78	6	0	0	0	0	0	70.19	2	*******
LG6	s6_26458336	95.757	<hkxhk>	{10}	83	77	6	0	0	0	0	0	72.3	2	*******
LG6	s6_26792543	96.868	<hkxhk>	{10}	83	76	6	0	0	0	0	1	72.89	2	*******
LG6	s6_16340513	98.85	<hkxhk>	{00}	4	82	78	0	0	0	0	2	66.78	2	*******
LG6	s6_27365943	98.971	<hkxhk>	{01}	9	73	81	0	0	0	0	3	65.38	2	*******
LG6	s6_28749805	101.628	<hkxhk>	{10}	84	70	12	0	0	0	0	0	66.53	2	*******
LG6	s6_28836372	109.641	<hkxhk>	{10}	88	38	23	0	0	0	0	17	92.48	2	*******
LG7	s7_9208237	0	<nnxnp>	{-0}	0	0	0	0	0	81	73	12	0.42	1	-
LG7	s7_8852295	0.156	<nnxnp>	{-0}	0	0	0	0	0	80	77	9	0.06	1	-
LG7	s7_8847523	0.178	<nnxnp>	{-0}	0	0	0	0	0	81	81	4	0	1	-
LG7	s7_7214138	0.194	<nnxnp>	{-0}	0	0	0	0	0	82	79	5	0.06	1	-
LG7	s7_8847486	0.214	<nnxnp>	{-0}	0	0	0	0	0	82	78	6	0.1	1	-
LG7	s7_8150180	0.849	<nnxnp>	{-0}	0	0	0	0	0	83	81	2	0.02	1	-
LG7	s7_7882206	0.894	<nnxnp>	{-0}	0	0	0	0	0	83	83	0	0	1	-
LG7	s7_7180846	0.916	<nnxnp>	{-0}	0	0	0	0	0	83	78	5	0.16	1	-
LG7	s7_8003480	1.016	<nnxnp>	{-0}	0	0	0	0	0	83	78	5	0.16	1	-
LG7	s7_8708734	2.134	<nnxnp>	{-0}	0	0	0	0	0	85	79	2	0.22	1	-
LG7	s7_8966163	2.765	<nnxnp>	{-0}	0	0	0	0	0	84	80	2	0.1	1	-
LG7	s7_8965414	2.966	<nnxnp>	{-0}	0	0	0	0	0	84	81	1	0.05	1	-
LG7	s7_9714288	4.036	<nnxnp>	{-0}	0	0	0	0	0	84	81	1	0.05	1	-
LG7	s7_9718023	4.051	<nnxnp>	{-0}	0	0	0	0	0	84	82	0	0.02	1	-
LG7	s7_10284537	7.454	<nnxnp>	{-0}	0	0	0	0	0	85	75	6	0.62	1	-
LG7	s7_11233991	10.926	<nnxnp>	{-0}	0	0	0	0	0	86	73	7	1.06	1	-
LG7	s7_12415495	11.754	<nnxnp>	{-0}	0	0	0	0	0	87	72	7	1.42	1	-
LG7	s7_12875275	12.736	<nnxnp>	{-0}	0	0	0	0	0	88	76	2	0.88	1	-
LG7	s7_13054323	13.658	<nnxnp>	{-0}	0	0	0	0	0	89	76	1	1.02	1	-
LG7	s7_13174662	14.696	<nnxnp>	{-1}	0	0	0	0	0	77	89	0	0.87	1	-
LG7	s7_13424047	15.923	<nnxnp>	{-0}	0	0	0	0	0	89	75	2	1.2	1	-
LG7	s7_13340043	15.936	<nnxnp>	{-0}	0	0	0	0	0	89	76	1	1.02	1	-
LG7	s7_13200273	15.941	<nnxnp>	{-1}	0	0	0	0	0	77	89	0	0.87	1	-
LG7	s7_13336515	15.941	<nnxnp>	{-0}	0	0	0	0	0	89	77	0	0.87	1	-
LG7	s7_13539944	16.465	<nnxnp>	{-0}	0	0	0	0	0	90	71	5	2.24	1	-
LG7	s7_13533028	17.325	<nnxnp>	{-0}	0	0	0	0	0	89	72	5	1.8	1	-
LG7	s7_14109649	18.428	<nnxnp>	{-0}	0	0	0	0	0	89	76	1	1.02	1	-
LG7	s7_14076214	18.431	<nnxnp>	{-0}	0	0	0	0	0	89	77	0	0.87	1	-
LG7	s7_14208952	19.047	<nnxnp>	{-1}	0	0	0	0	0	76	89	1	1.02	1	-
LG7	s7_14221099	19.051	<nnxnp>	{-0}	0	0	0	0	0	90	76	0	1.18	1	-
LG7	s7_14554867	22.778	<nnxnp>	{-0}	0	0	0	0	0	92	74	0	1.95	1	-
LG7	s7_14953318	27.265	<nnxnp>	{-0}	0	0	0	0	0	90	67	9	3.37	1	*
LG7	s7_15048268	27.829	<nnxnp>	{-0}	0	0	0	0	0	90	76	0	1.18	1	-
LG7	s7_15048234	28.132	<nnxnp>	{-0}	0	0	0	0	0	90	74	2	1.56	1	-
LG7	s7_15099071	28.441	<nnxnp>	{-0}	0	0	0	0	0	89	77	0	0.87	1	-
LG7	s7_15137424	28.999	<nnxnp>	{-1}	0	0	0	0	0	78	88	0	0.6	1	-
LG7	s7_15625838	32.14	<nnxnp>	{-1}	0	0	0	0	0	79	87	0	0.39	1	-
LG7	s7_15308378	32.14	<nnxnp>	{-0}	0	0	0	0	0	87	79	0	0.39	1	-
LG7	s7_15364396	32.184	<nnxnp>	{-1}	0	0	0	0	0	79	83	4	0.1	1	-
LG7	s7_15432532	32.998	<nnxnp>	{-0}	0	0	0	0	0	88	72	6	1.6	1	-
LG7	s7_15624579	33.418	<nnxnp>	{-1}	0	0	0	0	0	79	87	0	0.39	1	-
LG7	s7_15767469	34.423	<nnxnp>	{-0}	0	0	0	0	0	85	78	3	0.3	1	-
LG7	s7_15713057	34.633	<nnxnp>	{-0}	0	0	0	0	0	85	81	0	0.1	1	-
LG7	s7_16276894	36.974	<nnxnp>	{-0}	0	0	0	0	0	87	78	1	0.49	1	-
LG7	s7_16131360	37.041	<nnxnp>	{-0}	0	0	0	0	0	87	79	0	0.39	1	-
LG7	s7_16254312	37.041	<nnxnp>	{-1}	0	0	0	0	0	79	87	0	0.39	1	-
LG7	s7_16264107	37.053	<nnxnp>	{-1}	0	0	0	0	0	79	85	2	0.22	1	-
LG7	s7_16318952	37.072	<nnxnp>	{-1}	0	0	0	0	0	79	86	1	0.3	1	-
LG7	s7_16272663	37.15	<nnxnp>	{-0}	0	0	0	0	0	87	77	2	0.61	1	-
LG7	s7_16275899	37.166	<nnxnp>	{-0}	0	0	0	0	0	87	78	1	0.49	1	-
LG7	s7_15914396	37.315	<nnxnp>	{-0}	0	0	0	0	0	87	70	9	1.84	1	-
LG7	s7_15843057	37.358	<nnxnp>	{-1}	0	0	0	0	0	78	86	2	0.39	1	-
LG7	s7_16659647	37.425	<hkxhk>	{11}	48	78	39	0	0	0	0	1	1.47	2	-
LG7	s7_16274058	37.717	<nnxnp>	{-0}	0	0	0	0	0	89	77	0	0.87	1	-
LG7	s7_16273930	38.422	<nnxnp>	{-0}	0	0	0	0	0	89	77	0	0.87	1	-
LG7	s7_16555415	38.879	<hkxhk>	{00}	39	78	49	0	0	0	0	0	1.81	2	-
LG7	s7_16815320	40.822	<nnxnp>	{-0}	0	0	0	0	0	91	73	2	1.98	1	-
LG7	s7_16898998	41.504	<hkxhk>	{00}	36	85	44	0	0	0	0	1	0.93	2	-
LG7	s7_17145428	42.795	<nnxnp>	{-0}	0	0	0	0	0	92	71	3	2.71	1	-
LG7	CPPCT-033	43.122	<lmxll>	{1-}	0	0	0	40	40	0	0	86	0	1	-
LG7	s7_17143989	43.341	<nnxnp>	{-0}	0	0	0	0	0	91	75	0	1.54	1	-
LG7	s7_17277966	43.971	<nnxnp>	{-0}	0	0	0	0	0	90	76	0	1.18	1	-
LG7	s7_17372632	44.146	<nnxnp>	{-0}	0	0	0	0	0	90	72	4	2	1	-
LG7	s7_16812740	44.41	<lmxll>	{0-}	0	0	0	69	95	0	0	2	4.12	1	**
LG7	s7_17631375	45.271	<nnxnp>	{-0}	0	0	0	0	0	90	76	0	1.18	1	-
LG7	s7_17516009	46.276	<hkxhk>	{11}	42	90	34	0	0	0	0	0	1.95	2	-
LG7	s7_17829766	46.355	<nnxnp>	{-0}	0	0	0	0	0	86	71	9	1.43	1	-
LG7	s7_17986610	48.467	<lmxll>	{0-}	0	0	0	67	84	0	0	15	1.91	1	-
LG7	s7_17978335	48.634	<lmxll>	{0-}	0	0	0	68	94	0	0	4	4.17	1	**
LG7	MA020	49.648	<lmxll>	{0-}	0	0	0	68	98	0	0	0	5.42	1	**
LG7	s7_19356762	51.416	<nnxnp>	{-0}	0	0	0	0	0	88	76	2	0.88	1	-
LG7	s7_19429022	51.888	<nnxnp>	{-0}	0	0	0	0	0	89	77	0	0.87	1	-
LG7	UCD-CH14	51.897	<lmxll>	{0-}	0	0	0	68	98	0	0	0	5.42	1	**
LG7	s7_19308513	51.9	<nnxnp>	{-0}	0	0	0	0	0	87	72	7	1.42	1	-
LG7	s7_19457253	52.717	<nnxnp>	{-0}	0	0	0	0	0	89	72	5	1.8	1	-
LG7	s7_17473041	53.657	<hkxhk>	{11}	47	73	44	0	0	0	0	2	2.09	2	-
LG7	s7_22310655	59.006	<nnxnp>	{-1}	0	0	0	0	0	77	85	4	0.4	1	-
LG7	s7_21707414	59.007	<nnxnp>	{-0}	0	0	0	0	0	87	74	5	1.05	1	-
LG7	s7_22212793	59.126	<nnxnp>	{-1}	0	0	0	0	0	77	83	6	0.22	1	-
LG7	s7_22367087	59.328	<nnxnp>	{-1}	0	0	0	0	0	77	89	0	0.87	1	-
LG7	s7_18481353	60.967	<lmxll>	{0-}	0	0	0	69	97	0	0	0	4.72	1	**
LG7	s7_18481431	61.877	<lmxll>	{0-}	0	0	0	71	95	0	0	0	3.47	1	*
LG7	s7_22003777	68.244	<hkxhk>	{10}	39	83	29	0	0	0	0	15	2.81	2	-
LG7	s7_20075064	76.226	<lmxll>	{0-}	0	0	0	72	91	0	0	3	2.21	1	-
LG7	s7_20428302	78.243	<lmxll>	{0-}	0	0	0	74	92	0	0	0	1.95	1	-
LG7	s7_20918923	79.033	<lmxll>	{0-}	0	0	0	74	92	0	0	0	1.95	1	-
LG7	s7_21060831	79.649	<lmxll>	{0-}	0	0	0	75	86	0	0	5	0.75	1	-
LG7	s7_21139437	81.608	<lmxll>	{0-}	0	0	0	77	73	0	0	16	0.11	1	-
LG7	s7_20394461	81.678	<lmxll>	{0-}	0	0	0	78	83	0	0	5	0.16	1	-
LG7	s7_21672951	81.782	<lmxll>	{0-}	0	0	0	78	78	0	0	10	0	1	-
LG8	s8_421739	0	<lmxll>	{0-}	0	0	0	80	86	0	0	0	0.22	1	-
LG8	s8_718891	1.301	<lmxll>	{0-}	0	0	0	82	84	0	0	0	0.02	1	-
LG8	s8_556456	1.347	<lmxll>	{0-}	0	0	0	82	80	0	0	4	0.02	1	-
LG8	s8_1997024	5.403	<lmxll>	{0-}	0	0	0	83	82	0	0	1	0.01	1	-
LG8	s8_2567357	6.571	<lmxll>	{0-}	0	0	0	83	83	0	0	0	0	1	-
LG8	s8_3213348	7.174	<hkxhk>	{11}	33	92	39	0	0	0	0	2	2.88	2	-
LG8	s8_2838287	7.809	<lmxll>	{0-}	0	0	0	83	81	0	0	2	0.02	1	-
LG8	s8_2962383	7.852	<lmxll>	{0-}	0	0	0	83	83	0	0	0	0	1	-
LG8	s8_3743630	9.583	<lmxll>	{0-}	0	0	0	83	74	0	0	9	0.52	1	-
LG8	s8_4534514	10.734	<lmxll>	{0-}	0	0	0	86	77	0	0	3	0.5	1	-
LG8	s8_4536200	11.206	<lmxll>	{0-}	0	0	0	85	81	0	0	0	0.1	1	-
LG8	s8_4515583	11.255	<lmxll>	{0-}	0	0	0	85	79	0	0	2	0.22	1	-
LG8	s8_4390107	11.47	<lmxll>	{0-}	0	0	0	85	78	0	0	3	0.3	1	-
LG8	s8_5343038	11.765	<lmxll>	{0-}	0	0	0	86	79	0	0	1	0.3	1	-
LG8	s8_5071522	11.769	<lmxll>	{0-}	0	0	0	86	80	0	0	0	0.22	1	-
LG8	s8_5817068	13.653	<lmxll>	{0-}	0	0	0	84	77	0	0	5	0.3	1	-
LG8	s8_8886482	13.872	<lmxll>	{0-}	0	0	0	84	80	0	0	2	0.1	1	-
LG8	s8_9005717	14.733	<lmxll>	{0-}	0	0	0	85	73	0	0	8	0.91	1	-
LG8	s8_8054123	16.453	<lmxll>	{0-}	0	0	0	84	82	0	0	0	0.02	1	-
LG8	s8_8083234	16.462	<lmxll>	{0-}	0	0	0	84	80	0	0	2	0.1	1	-
LG8	s8_983025	19.23	<nnxnp>	{-0}	0	0	0	0	0	81	81	4	0	1	-
LG8	s8_556435	19.237	<nnxnp>	{-0}	0	0	0	0	0	82	82	2	0	1	-
LG8	s8_318973	19.238	<nnxnp>	{-0}	0	0	0	0	0	81	83	2	0.02	1	-
LG8	s8_151562	19.274	<nnxnp>	{-0}	0	0	0	0	0	82	84	0	0.02	1	-
LG8	s8_7292804	19.601	<lmxll>	{0-}	0	0	0	85	78	0	0	3	0.3	1	-
LG8	s8_1582930	22.064	<nnxnp>	{-0}	0	0	0	0	0	81	82	3	0.01	1	-
LG8	s8_1523785	22.287	<nnxnp>	{-0}	0	0	0	0	0	81	85	0	0.1	1	-
LG8	s8_1910818	23.495	<nnxnp>	{-0}	0	0	0	0	0	79	80	7	0.01	1	-
LG8	s8_1773373	24.126	<nnxnp>	{-0}	0	0	0	0	0	78	87	1	0.49	1	-
LG8	s8_1801529	24.147	<nnxnp>	{-0}	0	0	0	0	0	78	88	0	0.6	1	-
LG8	s8_11160044	24.876	<lmxll>	{0-}	0	0	0	80	85	0	0	1	0.15	1	-
LG8	s8_3234397	25.17	<nnxnp>	{-0}	0	0	0	0	0	76	87	3	0.74	1	-
LG8	s8_3097985	25.178	<nnxnp>	{-0}	0	0	0	0	0	76	90	0	1.18	1	-
LG8	s8_11538664	26.003	<lmxll>	{0-}	0	0	0	80	86	0	0	0	0.22	1	-
LG8	s8_11548517	26.024	<lmxll>	{0-}	0	0	0	80	82	0	0	4	0.02	1	-
LG8	s8_12178533	29.651	<lmxll>	{0-}	0	0	0	78	88	0	0	0	0.6	1	-
LG8	s8_13650238	30.262	<lmxll>	{0-}	0	0	0	79	87	0	0	0	0.39	1	-
LG8	s8_12146828	30.723	<nnxnp>	{-0}	0	0	0	0	0	75	91	0	1.54	1	-
LG8	s8_14266654	33.37	<lmxll>	{0-}	0	0	0	80	86	0	0	0	0.22	1	-
LG8	s8_14684738	33.938	<lmxll>	{0-}	0	0	0	81	84	0	0	1	0.05	1	-
LG8	EMPA-018	34.01	<lmxll>	{0-}	0	0	0	81	85	0	0	0	0.1	1	-
LG8	s8_14825086	34.012	<lmxll>	{0-}	0	0	0	81	84	0	0	1	0.05	1	-
LG8	s8_14684659	34.013	<lmxll>	{0-}	0	0	0	81	83	0	0	2	0.02	1	-
LG8	s8_14800416	34.678	<lmxll>	{0-}	0	0	0	82	84	0	0	0	0.02	1	-
LG8	s8_14984887	37.093	<lmxll>	{0-}	0	0	0	84	82	0	0	0	0.02	1	-
LG8	s8_16076425	37.723	<hkxhk>	{01}	47	77	42	0	0	0	0	0	1.17	2	-
LG8	s8_16035774	38.023	<hkxhk>	{01}	45	76	45	0	0	0	0	0	1.18	2	-
LG8	s8_15078212	39.291	<lmxll>	{0-}	0	0	0	87	76	0	0	3	0.74	1	-
LG8	s8_17113418	40.879	<nnxnp>	{-0}	0	0	0	0	0	76	81	9	0.16	1	-
LG8	s8_16987059	41.126	<nnxnp>	{-0}	0	0	0	0	0	78	75	13	0.06	1	-
LG8	s8_16622842	41.345	<nnxnp>	{-0}	0	0	0	0	0	80	79	7	0.01	1	-
LG8	s8_16769797	41.908	<nnxnp>	{-0}	0	0	0	0	0	79	87	0	0.39	1	-
LG8	s8_17060530	42.217	<nnxnp>	{-0}	0	0	0	0	0	80	83	3	0.06	1	-
LG8	s8_17102823	42.296	<nnxnp>	{-0}	0	0	0	0	0	80	86	0	0.22	1	-
LG8	s8_16891654	42.521	<hkxhk>	{10}	40	79	47	0	0	0	0	0	0.98	2	-
LG8	s8_16724126	42.538	<hkxhk>	{10}	40	77	49	0	0	0	0	0	1.84	2	-
LG8	s8_16371728	42.579	<hkxhk>	{10}	39	79	48	0	0	0	0	0	1.36	2	-
LG8	s8_16350869	42.584	<hkxhk>	{01}	47	80	39	0	0	0	0	0	0.99	2	-
LG8	s8_16284732	42.59	<hkxhk>	{10}	39	81	46	0	0	0	0	0	0.69	2	-
LG8	s8_16363716	44.569	<hkxhk>	{01}	54	68	43	0	0	0	0	1	6.56	2	**
LG8	s8_17565315	45.498	<nnxnp>	{-0}	0	0	0	0	0	80	83	3	0.06	1	-
LG8	s8_16924231	46.271	<lmxll>	{1-}	0	0	0	79	87	0	0	0	0.39	1	-
LG8	s8_17360959	46.781	<lmxll>	{1-}	0	0	0	79	76	0	0	11	0.06	1	-
LG8	s8_17430748	46.797	<lmxll>	{1-}	0	0	0	80	86	0	0	0	0.22	1	-
LG8	s8_17622545	46.8	<lmxll>	{1-}	0	0	0	80	85	0	0	1	0.15	1	-
LG8	s8_17817411	50.329	<hkxhk>	{01}	44	83	39	0	0	0	0	0	0.3	2	-
LG8	s8_17822690	50.514	<hkxhk>	{01}	43	85	38	0	0	0	0	0	0.4	2	-
LG8	s8_17895488	51.056	<hkxhk>	{10}	38	85	43	0	0	0	0	0	0.4	2	-
LG8	s8_17895511	51.056	<hkxhk>	{01}	43	85	38	0	0	0	0	0	0.4	2	-
LG8	s8_17933644	51.906	<hkxhk>	{01}	42	88	36	0	0	0	0	0	1.04	2	-
LG8	s8_17862339	54.256	<nnxnp>	{-0}	0	0	0	0	0	80	86	0	0.22	1	-
LG8	s8_17825313	54.68	<hkxhk>	{10}	45	70	51	0	0	0	0	0	4.51	2	-
LG8	s8_18154877	55.092	<lmxll>	{1-}	0	0	0	84	80	0	0	2	0.1	1	-
LG8	s8_18349979	56.351	<nnxnp>	{-0}	0	0	0	0	0	77	89	0	0.87	1	-
LG8	s8_18877572	57.868	<lmxll>	{1-}	0	0	0	89	77	0	0	0	0.87	1	-
LG8	s8_18689322	57.877	<lmxll>	{1-}	0	0	0	89	76	0	0	1	1.02	1	-
LG8	s8_18874819	58.5	<lmxll>	{1-}	0	0	0	90	75	0	0	1	1.36	1	-
LG8	s8_19002098	60.144	<hkxhk>	{10}	35	94	37	0	0	0	0	0	2.96	2	-
LG8	s8_18733221	61.368	<nnxnp>	{-0}	0	0	0	0	0	73	93	0	2.41	1	-
LG8	s8_18765081	61.395	<nnxnp>	{-0}	0	0	0	0	0	73	91	2	1.98	1	-
LG8	s8_18990269	61.641	<nnxnp>	{-0}	0	0	0	0	0	72	88	6	1.6	1	-
LG8	s8_19050830	61.835	<nnxnp>	{-0}	0	0	0	0	0	72	94	0	2.92	1	*
LG8	s8_19280793	61.904	<nnxnp>	{-0}	0	0	0	0	0	72	90	4	2	1	-
LG8	s8_19452527	62.785	<lmxll>	{1-}	0	0	0	91	75	0	0	0	1.54	1	-
LG8	s8_19452379	62.813	<lmxll>	{1-}	0	0	0	91	73	0	0	2	1.98	1	-
LG8	s8_19079250	64.919	<nnxnp>	{-0}	0	0	0	0	0	77	82	7	0.16	1	-
LG8	s8_19735484	65.978	<hkxhk>	{01}	38	92	36	0	0	0	0	0	2	2	-
LG8	s8_19503159	66.112	<hkxhk>	{10}	34	95	37	0	0	0	0	0	3.58	2	-
LG8	s8_19735596	66.722	<hkxhk>	{10}	36	91	38	0	0	0	0	1	1.8	2	-
LG8	s8_20436374	67.262	<lmxll>	{1-}	0	0	0	93	71	0	0	2	2.95	1	*
LG8	s8_20893960	67.374	<lmxll>	{1-}	0	0	0	93	73	0	0	0	2.41	1	-
LG8	s8_21371619	67.395	<lmxll>	{1-}	0	0	0	93	72	0	0	1	2.67	1	-
LG8	s8_20870745	67.406	<lmxll>	{1-}	0	0	0	93	72	0	0	1	2.67	1	-
LG8	s8_21416042	67.419	<lmxll>	{1-}	0	0	0	93	72	0	0	1	2.67	1	-
LG8	s8_19735750	69.281	<hkxhk>	{01}	39	86	41	0	0	0	0	0	0.27	2	-
LG8	s8_18958943	73.71	<hkxhk>	{01}	48	62	47	0	0	0	0	9	6.95	2	**
