# Supplementary material for: Construction of High Density Sweet Cherry (Prunus avium L.) Linkage Maps Using Microsatellite Markers and SNPs Detected by Genotyping-by-Sequencing (GBS)
Source: PLoS One. 2015 May 26;10(5):e0127750. doi: 10.1371/journal.pone.0127750 (PMC4444190; doi:10.1371/journal.pone.0127750)
Supplement: S8 Table — (XLSX) [file pone.0127750.s010.xlsx]

## Sheet: Hoja1
S8 Table. Summary of mapped and genic SNPs, and proportion of mapped SNPs in genic regions in parental ('Rainier', 'Rivedel') and consensus maps. LG – linkage group; GR – genic regions.
LG/ Scaffold	'Rainier'			'Rivedel'			Consensus
	Mapped	Genic	% in GR	Mapped	Genic	% in GR	Mapped	Genic	% in GR
1	99	80	80.8	104	84	80.8	211	172	81.5
2	62	50	80.6	49	39	79.6	120	95	79.2
3	55	43	78.2	36	25	69.4	113	86	76.1
4	13	11	84.6	56	45	80.4	71	56	78.9
5	64	52	81.3	35	27	77.1	130	106	81.5
6	78	62	79.5	78	60	76.9	137	98	71.5
7	19	17	89.5	79	64	81	87	74	85.1
8	53	43	81.1	37	31	83.8	95	82	86.3
Total	443	358	80.8	474	375	79.1	964	769	79.8
Average			81.9			78.6			80
