# Supplementary material for: Construction of High Density Sweet Cherry (Prunus avium L.) Linkage Maps Using Microsatellite Markers and SNPs Detected by Genotyping-by-Sequencing (GBS)
Source: PLoS One. 2015 May 26;10(5):e0127750. doi: 10.1371/journal.pone.0127750 (PMC4444190; doi:10.1371/journal.pone.0127750)
Supplement: S9 Table — (XLSX) [file pone.0127750.s011.xlsx]

## Sheet: Hoja1
S9 Table. Discrepancies between physical (according to Peach v1.0) and genetic position of mapped markers used for determination of physical position.
'Rainier'										'Rivedel'
LG1		LG2		LG5		LG6		LG8		LG1		LG3		LG6
SNP name	cM	SNP name	cM	SNP name	cM	SNP name	cM	SNP name	cM	SNP name	cM	SNP name	cM	SNP name	cM
s1_44124719	134.03	s2_17172344	31.03	s5_2722408	0	s6_4414263	1.48	s8_9005717	14.81	s1_46765766	122.68	s3_8552617	34.81	s6_4245831	2.55
s1_42980659	136.96	s2_16900286	31.04	s5_2760029	0.05	s6_4329192	1.63	s8_8054123	16.53	s1_45456733	128.22	s3_8552232	34.84	s6_3511911	4.82
s1_43149931	137.7	s2_16755779	31.1	s5_1986033	0.42	s6_2842360	4.57	s8_8083234	16.55	s1_44764873	128.22	s4_20443642	34.9	s6_3244211	5.67
s1_42975295	138.12	s2_17136218	31.11	s5_1797623	0.67	s6_3335499	4.57	s8_7292804	19.71	s1_44661638	128.27	s3_6777599	34.91	s6_3789625	5.67
s1_42397607	138.13	s2_17105740	31.12	s4_2613920	0.7	s6_3070552	5.19			s1_44451902	129.33	s3_6355796	35.13	CPSCT-002	6
s1_42186718	138.13	s2_16700339	31.2	s5_1121958	1.49	s6_3717000	5.19			s1_44686492	129.37			s6_2312275	6.56
s1_43475799	138.51	s2_17122248	31.4	s5_674862	2.44	s6_2002523	8.81			s1_44499877	130.69			s6_2312282	6.88
s1_43102782	138.52	s2_16175781	31.83	s5_389562	4.31	s6_1764223	8.82			s1_43809646	130.71			s6_2157551	8.01
s1_43114928	138.53	s2_15691757	31.83			s6_2630030	8.82			s1_44403793	130.82			s6_1853295	10.76
s1_43084529	138.54	s2_15693693	32.13			s6_2557368	8.82			s1_43909967	131.03			s6_1845874	11.27
s1_43150715	138.54	s2_15640184	32.28			s6_2205976	8.83			s1_43710227	131.03
s1_43102725	138.55	s2_15691801	32.37			s6_2205915	8.83
s1_43062476	138.55	s2_15356547	32.59			s6_2226015	8.84
s1_43701037	138.55	s2_15089812	32.72			s6_1493883	9.96
s1_43475775	138.56	s2_14256335	32.74			s6_1351835	11.21
s1_43221581	138.56	s2_14471925	33.09			s6_610667	11.61
s1_43084621	138.57					s6_4645424	11.62
s1_43139665	138.68					s6_4570814	11.75
s1_42924871	139.07					s6_472822	11.79
s4_3011114	139.08					s6_473011	11.83
s1_43016879	139.09					s6_472960	11.84
s1_42801165	139.1
s1_42186915	139.52
s1_42153859	139.56
										-	-
										-	-
										-	-
										-	-
										-	-
